# Supplementary material for: Tautomerization of 2,6-lutidines in the presence of B(C6F5)3 using catecholborane as a precatalyst
Source: Royal Society of Chemistry journal article supplement (doi:10.1039/c6cc00347h), 2016-01-01
Supplement: c6cc00347h1.pdf [file c6cc00347h1.pdf]

## I. Experimental Section

### General:

Solvents were dried by reflux under N<sub>2</sub> over sodium or CaH<sub>2</sub> and freshly distilled prior to use. Air-sensitive compounds were handled under a N<sub>2</sub> atmosphere using standard Schlenk and glovebox techniques. NMR spectra were recorded on Bruker SPECT NMR (400 MHz for <sup>1</sup>H, 376 MHz for <sup>19</sup>F, 100 MHz for <sup>13</sup>C) and Bruker DMX500 NMR (500 MHz for <sup>1</sup>H, 160 MHz for <sup>11</sup>B, 471 MHz for <sup>19</sup>F) spectrometers. Most assignments were based on a series of 2D NMR experiments. Elemental analyses were performed at VARIO EL III in Shanghai Institute of Organic Chemistry, CAS. HRMS analyses were performed at Bruker micrOTOF II. Crystallographic data for the structures reported in this paper have been deposited with the Cambridge Crystallographic Data Center: CCDC 1445374 (**1a**) and 1445373 (**2**) contain the supplementary crystallographic data for this paper. These data can be obtained free of charge from The Cambridge Crystallographic Data Centre at [www.ccdc.cam.ac.uk/data\\_request/cif](http://www.ccdc.cam.ac.uk/data_request/cif).

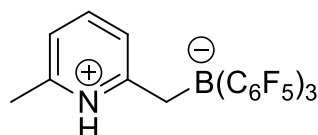

**Synthesis of 1a:** A solution of 2,6-lutidine (42 mg, 0.39 mmol) and HBcat (4.8 mg, 0.040 mmol) in CH<sub>2</sub>Cl<sub>2</sub> (1 mL) was added to the solution of B(C<sub>6</sub>F<sub>5</sub>)<sub>3</sub> (200mg, 0.39mmol) in CH<sub>2</sub>Cl<sub>2</sub> (1mL). The reaction mixture was stirred at 25 °C for 24h. Then the volatile was removed under vacuum. The resulting solid was washed with toluene/hexane (2mL/3mL) and pumped to dryness to give compound **1a** (205mg, 85%).

X-ray quality crystals were grown by slow evaporation of a THF solution.

<sup>1</sup>H NMR (400 MHz, THF-d<sub>8</sub>, 25 °C): δ [ppm] = 12.98 (br s, 1H, NH), 8.01 (t, 1H, <sup>3</sup>J<sub>H-H</sub> = 8.0 Hz, H4(py)), 7.36(d, 1H, <sup>3</sup>J<sub>H-H</sub> = 8.0 Hz, H5(py)), 7.31 (d, 1H, <sup>3</sup>J<sub>H-H</sub> = 8.0 Hz, H3(py)), 3.30 (q, 2H, <sup>2</sup>J<sub>B-H</sub> = 6.1 Hz, CH<sub>2</sub>), 2.52 (s, 3H, CH<sub>3</sub>).

$^{13}\text{C}$  NMR (100 MHz, THF- $d_8$ , 25 °C):  $\delta$  [ppm] = 166.10 (C2(py)), 151.19 (C6(py)), 148.93 (dm,  $^1J_{\text{C-F}}$  = 241 Hz, CF), 145.20 (C4(py)), 139.13 (dm,  $^1J_{\text{C-F}}$  = 241 Hz, CF), 137.42 (dm,  $^1J_{\text{C-F}}$  = 245 Hz, CF), 124.75 (C3(py)), 122.59 (C5(py)), 32.43 (q,  $^1J_{\text{C-B}}$  = 38 Hz,  $\text{CH}_2$ ), 18.78 ( $\text{CH}_3$ ).

$^{19}\text{F}$  NMR (376 MHz, THF- $d_8$ , 25 °C):  $\delta$  [ppm] = -134.07 (d, 6F,  $^3J_{\text{F-F}}$  = 21 Hz, *ortho*- $\text{C}_6\text{F}_5$ ), -164.93 (t, 3F,  $^3J_{\text{F-F}}$  = 20 Hz, *para*- $\text{C}_6\text{F}_5$ ), -168.81 (t, 6F,  $^3J_{\text{F-F}}$  = 21 Hz, *meta*- $\text{C}_6\text{F}_5$ ).

$^{11}\text{B}$  NMR (160 MHz, THF- $d_8$ , 25 °C):  $\delta$  [ppm] = -13.1 (s).

HRMS (ESI,  $m/z$ ): calcd for  $\text{C}_{25}\text{H}_9\text{BF}_{15}\text{N}$  [ $\text{M}+\text{Na}^+$ ] 642.0481, found 642.0485.

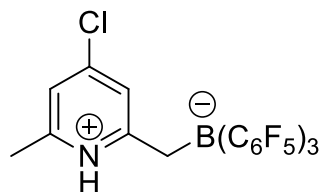

**Synthesis of 1d:** A solution of 4-chloro-2,6-lutidine (110 mg, 0.78 mmol) and HBcat (4.8mg, 0.040 mmol) in  $\text{CH}_2\text{Cl}_2$  (1 mL) was added to the solution of  $\text{B}(\text{C}_6\text{F}_5)_3$  (200mg, 0.39 mmol) in  $\text{CH}_2\text{Cl}_2$  (1 mL). The reaction mixture was stirred at 25 °C for 24h. After removal of the volatile under vacuum, the resulting solid was dissolved in  $\text{CH}_2\text{Cl}_2$  again. The dichloromethane solution was concentrated to ~3mL and stored at -40 °C overnight, affording a white solid which was filtered and dried under vacuum to give compound **1d** (184mg, 72%).

$^1\text{H}$  NMR (400 MHz,  $\text{CD}_2\text{Cl}_2$ , 25 °C):  $\delta$  [ppm] = 10.92 (br s, 1H, NH), 7.23 (s, 1H, H5(py)), 6.96 (d, 1H, H3(py)), 3.27 (q, 2H,  $^2J_{\text{B-H}}$  = 5.7 Hz,  $\text{CH}_2$ ), 2.55 (s, 3H,  $\text{CH}_3$ ).

$^{13}\text{C}$  NMR (100 MHz,  $\text{CD}_2\text{Cl}_2$ , 25 °C):  $\delta$  [ppm] = 167.79 (C2(py)), 154.38 (C6(py)),

151.09 (C4(py)), 148.30 (dm,  $^1J_{C-F}$  = 234 Hz, CF), 139.05 (dm,  $^1J_{C-F}$  = 245 Hz, CF), 137.34 (dm,  $^1J_{C-F}$  = 242 Hz, CF), 125.14 (C3(py)), 122.74 (C5(py)), 32.75 (q,  $^1J_{C-B}$  = 37 Hz, CH<sub>2</sub>), 20.22 (CH<sub>3</sub>).

<sup>19</sup>F NMR (376 MHz, CD<sub>2</sub>Cl<sub>2</sub>, 25 °C): δ [ppm] = -132.38 (d, 6F,  $^3J_{F-F}$  = 22 Hz, *ortho*-C<sub>6</sub>F<sub>5</sub>), -160.73 (t, 3F,  $^3J_{F-F}$  = 20 Hz, *para*-C<sub>6</sub>F<sub>5</sub>), -165.14 (t, 6F,  $^3J_{F-F}$  = 20 Hz, *meta*-C<sub>6</sub>F<sub>5</sub>).

<sup>11</sup>B NMR (160 MHz, CD<sub>2</sub>Cl<sub>2</sub>, 25 °C): δ [ppm] = -13.1 (s).

HRMS (ESI, m/z): calcd for C<sub>25</sub>H<sub>8</sub>BF<sub>15</sub>N [M+Na<sup>+</sup>] 676.0097, found 676.0095.

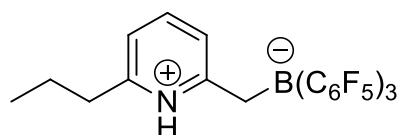

**Synthesis of 1e:** A solution of 6-propyl-2-methylpyridine (47mg, 0.39mmol) and H<sub>2</sub>cat (4.8mg, 0.040mmol) in CH<sub>2</sub>Cl<sub>2</sub> (1mL) was added to the solution of B(C<sub>6</sub>F<sub>5</sub>)<sub>3</sub> (200mg, 0.39mmol) in CH<sub>2</sub>Cl<sub>2</sub> (1mL). The reaction mixture was stirred at 25 °C for 24h. Then the volatile was removed under vacuum. The resulting solid was washed with toluene/hexane (2ml/3ml) and again pumped to dryness to give compound **1e** (200mg, 81%).

<sup>1</sup>H NMR (400 MHz, THF-d<sub>8</sub>, 25 °C): δ [ppm] = 12.94 (br s, 1H, NH), 8.04 (t, 1H,  $^3J_{H-H}$  = 8.0 Hz, H4(py)), 7.37(d, 1H,  $^3J_{H-H}$  = 8.0 Hz, H5(py)), 7.31 (d, 1H,  $^3J_{H-H}$  = 8.0 Hz, H3(py)), 3.31 (q, 2H,  $^2J_{B-H}$  = 6.1 Hz, CH<sub>2</sub>), 2.74 (t, 2H,  $^3J_{H-H}$  = 7.6 Hz, CH<sub>2</sub>CH<sub>2</sub>), 1.64 (m, 2H,  $^3J_{H-H}$  = 7.4 Hz, CH<sub>2</sub>CH<sub>2</sub>), 0.95 (t, 3H,  $^3J_{H-H}$  = 7.4 Hz, CH<sub>3</sub>CH<sub>2</sub>).

<sup>13</sup>C NMR (100 MHz, THF-d<sub>8</sub>, 25 °C): δ [ppm] = 166.38 (C2(py)), 154.87 (C6(py)), 148.89 (dm,  $^1J_{C-F}$  = 238 Hz, CF), 145.26 (C4(py)), 139.13 (dm,  $^1J_{C-F}$  = 247 Hz, CF), 137.41 (dm,  $^1J_{C-F}$  = 250 Hz, CF<sub>5</sub>), 125.10 (C3(py)), 121.96 (C5(py)), 35.42 (CH<sub>2</sub>CH<sub>2</sub>),

32.36 (q,  $^1J_{C-B} = 38$  Hz  $\text{CH}_2\text{B}(\text{C}_6\text{F}_5)_3$ ), 23.26 ( $\text{CH}_3\text{CH}_2$ ), 13.31 ( $\text{CH}_3$ ).

$^{19}\text{F}$  NMR (376 MHz,  $\text{THF-d}_8$ , 25 °C):  $\delta$  [ppm] = -132.23 (d, 6F,  $^3J_{\text{F-F}} = 22$  Hz, *ortho*- $\text{C}_6\text{F}_5$ ), -163.08 (t, 3F,  $^3J_{\text{F-F}} = 20$  Hz, *para*- $\text{C}_6\text{F}_5$ ), -166.82 (t, 6F,  $^3J_{\text{F-F}} = 19$  Hz, *meta*- $\text{C}_6\text{F}_5$ ).

$^{11}\text{B}$  NMR (160 MHz,  $\text{THF-d}_8$ , 25 °C):  $\delta$  [ppm] = -13.2 (s).

HRMS (ESI,  $m/z$ ): calcd for  $\text{C}_{27}\text{H}_{13}\text{BF}_{15}\text{N}$  [ $\text{M}+\text{NH}_4^+$ ] 651.1245, found 651.1245.

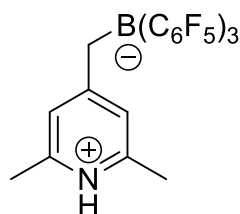

**Synthesis of 1f:** A solution of 2,4,6-collidine (48mg, 0.40mmol) and HBCat (4.8mg, 0.040mmol) in  $\text{CH}_2\text{Cl}_2$  (1mL) was added to the solution of  $\text{B}(\text{C}_6\text{F}_5)_3$  (200mg, 0.39mmol) in  $\text{CH}_2\text{Cl}_2$  (1mL). The reaction mixture was stirred at 25 °C for 24h. After removal of the volatile under vacuum, the resulting solid was dissolved in  $\text{CH}_2\text{Cl}_2$ . The dichloromethane solution was concentrated to ~2mL and stored at -40 °C overnight, affording a white solid which was filtered and dried under vacuum to give compound **1f** (94mg, 38%).

$^1\text{H}$  NMR (400 MHz,  $\text{THF-d}_8$ , 25 °C):  $\delta$  [ppm] = 13.13 (br s, 1H, NH), 6.88 (s, 2H,  $\text{H}3(\text{py})$ ), 3.16 (q, 2H,  $^2J_{\text{B-H}} = 7.1$  Hz,  $\text{CH}_2$ ), 2.45 (s, 6H,  $\text{CH}_3$ ).

$^{13}\text{C}$  NMR (100 MHz,  $\text{THF-d}_8$ , 25 °C):  $\delta$  [ppm] = 174.31 ( $\text{C}4(\text{py})$ ), 150.07 ( $\text{C}2(\text{py})$ ), 148.80 (dm,  $^1J_{\text{C-F}} = 249$  Hz, CF), 138.82 (dm,  $^1J_{\text{C-F}} = 249$  Hz, CF), 137.37 (dm,  $^1J_{\text{C-F}} = 249$  Hz, CF), 124.87 ( $\text{C}3(\text{py})$ ), 35.93 (q,  $^1J_{\text{C-B}} = 39$  Hz,  $\text{CH}_2$ ), 18.63 ( $\text{CH}_3$ ).

$^{19}\text{F}$  NMR (376 MHz,  $\text{THF-d}_8$ , 25 °C):  $\delta$  [ppm] = -133.24 (d, 6F,  $^3J_{\text{F-F}} = 21\text{Hz}$ , *ortho*-

$\text{C}_6\text{F}_5$ ), -165.88 (t, 3F,  $^3J_{\text{F-F}} = 20$  Hz, *para*-  $\text{C}_6\text{F}_5$ ), -169.26 (t, 6F,  $^3J_{\text{F-F}} = 19$  Hz, *meta*- $\text{C}_6\text{F}_5$ ).

$^{11}\text{B}$  NMR (160 MHz, THF- $\text{d}_8$ , 25 °C):  $\delta$  [ppm] = -12.4 (s).

HRMS (ESI,  $m/z$ ): calcd for  $\text{C}_{26}\text{H}_{11}\text{BF}_{15}\text{N}$  [ $\text{M}+\text{Na}^+$ ] 656.0643, found 656.0642.

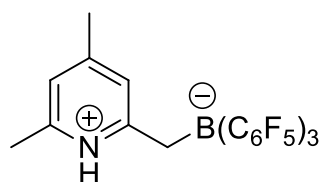

**Synthesis of 1f’:** A solution of 2,4,6-collidine (48mg, 0.40mmol) and HBCat (4.8mg, 0.040mmol) in toluene (1mL) was added to the solution of  $\text{B}(\text{C}_6\text{F}_5)_3$  (200mg, 0.39mmol) in toluene (2mL). The reaction mixture was stirred at 50 °C for 24h. After removal of the volatile under vacuum, the resulting solid was dissolved in  $\text{CH}_2\text{Cl}_2$ . The dichloromethane solution was concentrated to ~2mL and stored at -40 °C overnight, affording a white solid which was filtered and dried under vacuum to give compound 1f’ (188mg, 76%).

$^1\text{H}$  NMR (400 MHz,  $\text{CD}_2\text{Cl}_2$ , 25 °C):  $\delta$  [ppm] = 10.47 (br s, 1H, NH), 7.01 (s, 1H,  $H_5(\text{py})$ ), 6.74 (d, 1H,  $H_3(\text{py})$ ), 3.21 (q, 2H,  $^2J_{\text{B-H}} = 5.2$  Hz,  $\text{CH}_2$ ), 2.50 (s, 3H,  $\text{C}5(\text{py})\text{CH}_3$ ), 2.33 (s, 3H,  $\text{C}4(\text{py})\text{CH}_3$ ).

$^{13}\text{C}$  NMR (100 MHz,  $\text{CD}_2\text{Cl}_2$ , 25 °C):  $\delta$  [ppm] = 165.24 ( $\text{C}2(\text{py})$ ), 159.58 ( $\text{C}6(\text{py})$ ), 149.09 ( $\text{C}4(\text{py})$ ), 148.36 (dm,  $^1J_{\text{C-F}} = 238$  Hz, CF), 138.94 (dm,  $^1J_{\text{C-F}} = 250$  Hz, CF), 137.25 (dm,  $^1J_{\text{C-F}} = 255$  Hz, CF), 125.37 ( $\text{C}3(\text{py})$ ), 123.04 ( $\text{C}5(\text{py})$ ), 31.86 (q,  $^1J_{\text{C-B}} = 37$  Hz,  $\text{CH}_2$ ), 22.18 ( $\text{C}4(\text{py})\text{CH}_3$ ), 20.07 ( $\text{C}5(\text{py})\text{CH}_3$ ).

$^{19}\text{F}$  NMR (376 MHz,  $\text{CD}_2\text{Cl}_2$ , 25 °C):  $\delta$  [ppm] = -132.39 (d, 6F,  $^3J_{\text{F-F}} = 21$  Hz, *ortho*- $\text{C}_6\text{F}_5$ ), -161.33 (t, 3F,  $^3J_{\text{F-F}} = 21$  Hz, *para*-  $\text{C}_6\text{F}_5$ ), -165.53 (t, 6F,  $^3J_{\text{F-F}} = 20$  Hz,

*meta*-C<sub>6</sub>F<sub>5</sub>).

<sup>11</sup>B NMR (160 MHz, CD<sub>2</sub>Cl<sub>2</sub>, 25 °C): δ [ppm] = -13.3 (s).

HRMS (ESI, m/z): calcd for C<sub>26</sub>H<sub>11</sub>BF<sub>15</sub>N [M+Na<sup>+</sup>] 656.0643, found 656.0642.

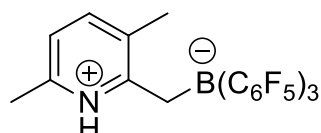

**Synthesis of 1g:** A solution of 3-methyl-2,6-lutidine (47mg, 0.39mmol) and H<sub>B</sub>cat (4.8mg, 0.040mmol) in CH<sub>2</sub>Cl<sub>2</sub> (1mL) was added to the solution of B(C<sub>6</sub>F<sub>5</sub>)<sub>3</sub> (200mg, 0.39mmol) in CH<sub>2</sub>Cl<sub>2</sub> (1mL). The reaction mixture was stirred at 25 °C for 24h. After removal of the volatile under vacuum, the resulting solid was dissolved in CH<sub>2</sub>Cl<sub>2</sub> again. The dichloromethane solution was concentrated to ~1mL and stored at -40 °C overnight, affording a white solid which was filtered and dried under vacuum to give compound **1g** (168mg, 68%).

<sup>1</sup>H NMR (400 MHz, CD<sub>2</sub>Cl<sub>2</sub>, 25 °C): δ [ppm] = 10.75 (br s, 1H, NH), 7.82 (d, 1H, <sup>3</sup>J<sub>H-H</sub> = 7.9 Hz, H4(py)), 7.15 (d, 1H, <sup>3</sup>J<sub>H-H</sub> = 7.9 Hz, H5(py)), 3.27 (q, 2H, <sup>2</sup>J<sub>B-H</sub> = 6.1 Hz, CH<sub>2</sub>), 2.46 (s, 3H, C6(py)CH<sub>3</sub>), 2.16 (s, 3H, C3(py)CH<sub>3</sub>).

<sup>13</sup>C NMR (100 MHz, CD<sub>2</sub>Cl<sub>2</sub>, 25 °C): δ [ppm] = 165.17 (C2(py)), 148.38 (dm, <sup>1</sup>J<sub>C-F</sub> = 238 Hz, CF), 147.80 (C6(py)), 146.44 (C4(py)), 139.12 (dm, <sup>1</sup>J<sub>C-F</sub> = 246 Hz, CF), 137.25 (dm, <sup>1</sup>J<sub>C-F</sub> = 245 Hz, CF), 135.33 (C3(py)), 122.03 (C5(py)), 28.06 (q, <sup>1</sup>J<sub>C-B</sub> = 37 Hz, CH<sub>2</sub>), 19.78 (C6(py)CH<sub>3</sub>), 18.23 (C3(py)CH<sub>3</sub>).

<sup>19</sup>F NMR (376 MHz, CD<sub>2</sub>Cl<sub>2</sub>, 25 °C): δ [ppm] = -132.44 (d, 6F, <sup>3</sup>J<sub>F-F</sub> = 22 Hz, *ortho*-C<sub>6</sub>F<sub>5</sub>), -160.66 (t, 3F, <sup>3</sup>J<sub>F-F</sub> = 20 Hz, *para*-C<sub>6</sub>F<sub>5</sub>), -165.08 (t, 6F, <sup>3</sup>J<sub>F-F</sub> = 20 Hz, *meta*-C<sub>6</sub>F<sub>5</sub>).

$^{11}\text{B}$  NMR (160 MHz,  $\text{CD}_2\text{Cl}_2$ , 25  $^\circ\text{C}$ ):  $\delta$  [ppm] = -14.1 (s).

HRMS (ESI,  $m/z$ ): calcd for  $\text{C}_{26}\text{H}_{11}\text{BF}_{15}\text{N}$  [ $\text{M}+\text{NH}_4^+$ ] 651.1089, found 651.1088.

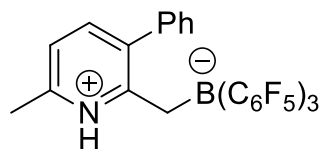

**Synthesis of 1h:** A solution of 3-phenyl-2,6-lutidine (144mg, 0.78mmol) and HBcat (4.8mg, 0.040mmol) in  $\text{CH}_2\text{Cl}_2$  (1mL) was added to the solution of  $\text{B}(\text{C}_6\text{F}_5)_3$  (200mg, 0.39mmol) in  $\text{CH}_2\text{Cl}_2$  (1mL). The reaction mixture was stirred at 25  $^\circ\text{C}$  for 24h. Then the volatile was removed under vacuum. The resulting solid was washed with toluene/hexane (1ml/3ml) and again pumped to dryness to give compound **1h** (130mg, 48%).

$^1\text{H}$  NMR (400 MHz,  $\text{CD}_2\text{Cl}_2$ , 25  $^\circ\text{C}$ ):  $\delta$  [ppm] = 11.00 (br s, 1H, NH), 7.91 (d, 1H,  $^3J_{\text{H-H}} = 8.0$  Hz, *H4*(py)), 7.44-7.45 (br m, 3H, *meta*- $\text{C}_6\text{H}_5$  and *para*- $\text{C}_6\text{H}_5$ ), 7.30 (d, 1H,  $^3J_{\text{H-H}} = 8.0$  Hz, *H5*(py)), 7.12 (br m, 2H, *ortho*- $\text{C}_6\text{H}_5$ ), 3.44 (q, 2H,  $^2J_{\text{B-H}} = 6.2$  Hz,  $\text{CH}_2$ ), 2.55 (s, 3H,  $\text{CH}_3$ ).

$^{13}\text{C}$  NMR (100 MHz,  $\text{CD}_2\text{Cl}_2$ , 25  $^\circ\text{C}$ ):  $\delta$  [ppm] = 164.81 ( $\text{C2}(\text{py})$ ), 149.44 ( $\text{C6}(\text{py})$ ), 148.26 (dm,  $^1J_{\text{C-F}} = 237$  Hz, CF), 146.59 ( $\text{C4}(\text{py})$ ), 139.79 (*ipso*- $\text{C}_6\text{H}_5$ ), 139.39 (dm,  $^1J_{\text{C-F}} = 246$  Hz, CF), 137.24 (dm,  $^1J_{\text{C-F}} = 240$  Hz, CF), 135.14 ( $\text{C3}(\text{py})$ ), 129.47 (*para*- $\text{C}_6\text{H}_5$ ), 129.27 (*meta*- $\text{C}_6\text{H}_5$ ), 129.24 (*ortho*- $\text{C}_6\text{H}_5$ ), 122.26( $\text{C5}(\text{py})$ ), 28.50 (q,  $^1J_{\text{C-B}} = 37$  Hz,  $\text{CH}_2$ ), 20.05 ( $\text{CH}_3$ ).

$^{19}\text{F}$  NMR (376 MHz,  $\text{CD}_2\text{Cl}_2$ , 25  $^\circ\text{C}$ ):  $\delta$  [ppm] = -132.46 (d, 6F,  $^3J_{\text{F-F}} = 22$  Hz, *ortho*- $\text{C}_6\text{F}_5$ ), -160.85 (t, 3F,  $^3J_{\text{F-F}} = 20$  Hz, *para*- $\text{C}_6\text{F}_5$ ), -165.06 (t, 6F,  $^3J_{\text{F-F}} = 20$  Hz, *meta*- $\text{C}_6\text{F}_5$ ).

$^{11}\text{B}$  NMR (160 MHz,  $\text{CD}_2\text{Cl}_2$ , 25  $^\circ\text{C}$ ):  $\delta$  [ppm] = -13.9 (s).

HRMS (ESI, m/z): calcd for C<sub>31</sub>H<sub>13</sub>BF<sub>15</sub>N [M+Na<sup>+</sup>] 718.0799, found 718.0799.

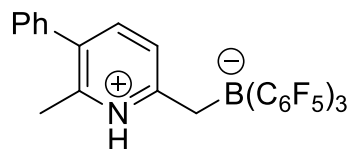

**Synthesis of 1h’:** A solution of 3-phenyl-2,6-lutidine (144mg, 0.78mmol) and HBcat (4.8mg, 0.040mmol) in toluene (1mL) was added to the solution of B(C<sub>6</sub>F<sub>5</sub>)<sub>3</sub> (200mg, 0.39mmol) in toluene (2mL). The reaction mixture was stirred at 70 °C for 24h. After removal of the volatile under vacuum, the resulting solid was dissolved in CH<sub>2</sub>Cl<sub>2</sub>. The dichloromethane solution was concentrated to ~2mL and hexane was added drop by drop until precipitation appeared. Then the resulting solution was stored at -40 °C overnight, affording a white solid which was filtered and dried under vacuum to give compound **1h’** (169mg, 62%).

<sup>1</sup>H NMR (400 MHz, CD<sub>2</sub>Cl<sub>2</sub>, 25 °C): δ [ppm] = 10.88 (br s, 1H, NH), 7.85 (d, 1H, <sup>3</sup>J<sub>H-H</sub> = 8.0 Hz, H4(py)), 7.51 (br m, 3H, *meta*-C<sub>6</sub>H<sub>5</sub> and *para*-C<sub>6</sub>H<sub>5</sub>), 7.23 (br m, 2H, *ortho*-C<sub>6</sub>H<sub>5</sub>), 7.07 (d, 1H, <sup>3</sup>J<sub>H-H</sub> = 8.0 Hz, H3(py)), 3.35 (q, 2H, <sup>2</sup>J<sub>B-H</sub> = 6.2 Hz, CH<sub>2</sub>), 2.51 (s, 3H, CH<sub>3</sub>).

<sup>13</sup>C NMR (100 MHz, CD<sub>2</sub>Cl<sub>2</sub>, 25 °C): δ [ppm] = 165.42 (C2(py)), 148.35 (dm, <sup>1</sup>J<sub>C-F</sub> = 243 Hz, CF), 147.69 (C6(py)), 146.06 (C4(py)), 136.25 (*ipso*-C<sub>6</sub>H<sub>5</sub>), 139.01 (dm, <sup>1</sup>J<sub>C-F</sub> = 252 Hz, CF), 137.26 (dm, <sup>1</sup>J<sub>C-F</sub> = 248 Hz, CF), 134.61 (C5(py)), 129.85 (*para*-C<sub>6</sub>H<sub>5</sub>), 129.64 (*meta*-C<sub>6</sub>H<sub>5</sub>), 129.10 (*ortho*-C<sub>6</sub>H<sub>5</sub>), 125.20(C3(py)), 32.26 (q, <sup>1</sup>J<sub>C-B</sub> = 37 Hz, CH<sub>2</sub>), 19.61 (CH<sub>3</sub>).

<sup>19</sup>F NMR (376 MHz, CD<sub>2</sub>Cl<sub>2</sub>, 25 °C): δ [ppm] = -132.31 (d, 6F, <sup>3</sup>J<sub>F-F</sub> = 22 Hz, *ortho*-C<sub>6</sub>F<sub>5</sub>), -161.01 (t, 3F, <sup>3</sup>J<sub>F-F</sub> = 20 Hz, *para*-C<sub>6</sub>F<sub>5</sub>), -165.32 (t, 6F, <sup>3</sup>J<sub>F-F</sub> = 20 Hz, *meta*-C<sub>6</sub>F<sub>5</sub>).



$^{11}\text{B}$  NMR (160 MHz,  $\text{CD}_2\text{Cl}_2$ , 25  $^\circ\text{C}$ ):  $\delta$  [ppm] = -13.1 (s).

HRMS (ESI,  $m/z$ ): calcd for  $\text{C}_{31}\text{H}_{13}\text{BF}_{15}\text{N}$  [ $\text{M}+\text{Na}^+$ ] 718.0799, found 718.0799.

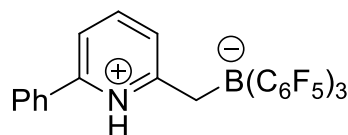

**Synthesis of 1i:** A solution of 2-methyl-6-phenylpyridine (86mg, 0.51mmol) and HBCat (6.0mg, 0.050mmol) in  $\text{CH}_2\text{Cl}_2$  (1mL) was added to the solution of  $\text{B}(\text{C}_6\text{F}_5)_3$  (256mg, 0.50mmol) in  $\text{CH}_2\text{Cl}_2$  (1mL). The reaction mixture was stirred at 25  $^\circ\text{C}$  for 24h. Then the volatile was removed under vacuum, and the resulting solid was dissolved in toluene. The resulting toluene solution was concentrated to 2~3mL and stored at -40  $^\circ\text{C}$  overnight, affording a white solid which was filtered and dried under vacuum to give compound **1i** (272mg, 80%).

$^1\text{H}$  NMR (400 MHz,  $\text{CD}_2\text{Cl}_2$ , 25  $^\circ\text{C}$ ):  $\delta$  [ppm] = 11.23 (br s, 1H, NH), 8.02 (t, 1H,  $^3J_{\text{H-H}} = 8.0$  Hz,  $\text{H4}(\text{py})$ ), 7.70 (d, 1H,  $^3J_{\text{H-H}} = 7.4$  Hz,  $\text{H5}(\text{py})$ ), 7.71-7.63 (m, 3H,  $\text{C}_6\text{H}_5$ ), 7.50 (d, 2H,  $^3J_{\text{H-H}} = 7.4$  Hz, *ortho*- $\text{C}_6\text{H}_5$ ), 7.05 (d, 1H,  $^3J_{\text{H-H}} = 7.4$  Hz,  $\text{H3}(\text{py})$ ), 3.41 (q, 2H,  $^2J_{\text{B-H}} = 8.0$  Hz,  $\text{CH}_2$ ).

$^{13}\text{C}$  NMR (100 MHz,  $\text{CD}_2\text{Cl}_2$ , 25  $^\circ\text{C}$ ):  $\delta$  [ppm] = 167.33 ( $\text{C2}(\text{py})$ ), 150.53 ( $\text{C6}(\text{py})$ ), 148.33 (dm,  $^1J_{\text{C-F}} = 235$  Hz, CF), 145.60 ( $\text{C4}(\text{py})$ ), 140.16 (*ipso*- $\text{C}_6\text{H}_5$ ), 139.07 (dm,  $^1J_{\text{C-F}} = 249$  Hz, CF), 137.35 (dm,  $^1J_{\text{C-F}} = 240$  Hz, CF), 133.37 ( $\text{C5}(\text{py})$ ), 130.94 (*meta*- $\text{C}_6\text{H}_5$ ), 126.69 (*ortho*- $\text{C}_6\text{H}_5$ ), 125.79 ( $\text{C3}(\text{py})$ ), 119.96 (*para*- $\text{C}_6\text{H}_5$ ), 32.60 (q,  $^1J_{\text{C-B}} = 36$  Hz,  $\text{CH}_2$ ).

$^{19}\text{F}$  NMR (376 MHz,  $\text{CD}_2\text{Cl}_2$ , 25  $^\circ\text{C}$ ):  $\delta$  [ppm] = -132.27 (d, 6F,  $^3J_{\text{F-F}} = 22$  Hz, *ortho*- $\text{C}_6\text{F}_5$ ), -160.86 (t, 3F,  $^3J_{\text{F-F}} = 20$  Hz, *para*- $\text{C}_6\text{F}_5$ ), -165.18 (t, 6F,  $^3J_{\text{F-F}} = 20$  Hz, *meta*- $\text{C}_6\text{F}_5$ ).

$^{11}\text{B}$  NMR (160 MHz,  $\text{CD}_2\text{Cl}_2$ , 25  $^\circ\text{C}$ ):  $\delta$  [ppm] = -13.1 (s).

HRMS (ESI,  $m/z$ ): calcd for  $\text{C}_{30}\text{H}_{11}\text{BF}_{15}\text{N}$  [ $\text{M}+\text{Na}^+$ ] 704.0643, found 704.0642.

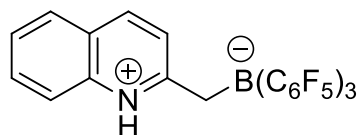

**Synthesis of 1j:** A solution of quinaldine (56mg, 0.39mmol) and HBcat (4.8mg, 0.040mmol) in  $\text{CH}_2\text{Cl}_2$  (1mL) was added to the solution of  $\text{B}(\text{C}_6\text{F}_5)_3$  (200mg, 0.39mmol) in  $\text{CH}_2\text{Cl}_2$  (1mL). The reaction mixture was stirred at 25  $^\circ\text{C}$  for 24h. Then the volatile was removed under vacuum, and the resulting solid was dissolved in toluene. The resulting toluene solution was concentrated to 5mL and stored at -40  $^\circ\text{C}$  overnight, affording a white solid which was filtered and dried under vacuum to give compound **1j** (177mg, 70%).

$^1\text{H}$  NMR (400 MHz,  $\text{CD}_2\text{Cl}_2$ , 25  $^\circ\text{C}$ ):  $\delta$  [ppm] = 11.24 (br s, 1H, NH), 8.41 (d, 1H,  $^3J_{\text{H-H}} = 8.8$  Hz, H4(qu)), 8.03 (d, 1H,  $^3J_{\text{H-H}} = 8.2$  Hz, H5(qu)), 7.98 (dt, 1H,  $^3J_{\text{H-H}} = 7.9$  Hz,  $^4J_{\text{H-H}} = 1.3$  Hz, H7(qu)), 7.79(dt, 1H,  $^3J_{\text{H-H}} = 8.0$  Hz,  $^4J_{\text{H-H}} = 1.1$  Hz, H6(qu)), 7.72 (d, 1H,  $^3J_{\text{H-H}} = 8.4$  Hz, H8(qu)), 7.24 (d, 1H,  $^3J_{\text{H-H}} = 8.8$  Hz, H3(qu)), 3.60 (q, 2H,  $^2J_{\text{B-H}} = 5.9$  Hz,  $\text{CH}_2$ ).

$^{13}\text{C}$  NMR (100 MHz,  $\text{CD}_2\text{Cl}_2$ , 25  $^\circ\text{C}$ ):  $\delta$  [ppm] = 171.16 (C2(qu)), 148.39 (dm,  $^1J_{\text{C-F}} = 241$  Hz, CF), 144.78 (C4(qu)), 139.10 (dm,  $^1J_{\text{C-F}} = 250$  Hz, CF), 137.33 (dm,  $^1J_{\text{C-F}} = 240$  Hz, CF), 136.64 (C8a(qu)), 135.18 (C7(qu)), 129.57 (C5(qu)), 129.47 (C6(qu)), 125.99 (C4a(qu)), 123.87 (C3(qu)), 118.70 (C8(qu)), 35.08 (q,  $^1J_{\text{C-B}} = 36$  Hz,  $\text{CH}_2$ ).

$^{19}\text{F}$  NMR (376 MHz,  $\text{CD}_2\text{Cl}_2$ , 25  $^\circ\text{C}$ ):  $\delta$  [ppm] = -132.28 (d, 6F,  $^3J_{\text{F-F}} = 22$  Hz, *ortho*- $\text{C}_6\text{F}_5$ ), -160.83 (t, 3F,  $^3J_{\text{F-F}} = 20$  Hz, *para*- $\text{C}_6\text{F}_5$ ), -165.26 (t, 6F,  $^3J_{\text{F-F}} = 20$  Hz, *meta*- $\text{C}_6\text{F}_5$ ).

$^{11}\text{B}$  NMR (160 MHz,  $\text{CD}_2\text{Cl}_2$ , 25  $^\circ\text{C}$ ):  $\delta$  [ppm] = -12.8 (s).

HRMS (ESI,  $m/z$ ): calcd for  $\text{C}_{28}\text{H}_9\text{BF}_{15}\text{N}$  [ $\text{M}+\text{Na}^+$ ] 678.0486, found 678.0486.

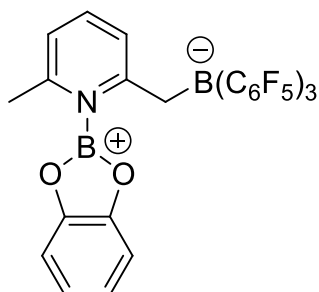

**Synthesis of 2:** A solution of  $\text{B}(\text{C}_6\text{F}_5)_3$  (410 mg, 0.8 mmol) in toluene (2mL) was added to the solution of ((6-methyl-2-pyridyl)methyl)lithium (90 mg, 0.8 mmol) in toluene at room temperature. Then the reaction mixture was stirred at room temperature for 3 h. Afterwards, hexane (5 mL) was added and the resulting slurry was filtered and washed with hexane (2x2 mL). The resulting solid was pumped to dryness to give compound lithium (6-methyl-2-pyridyl)methyltris(pentafluorophenyl)borate (430mg, 95%) and it was used without further purification. A solution of ClBcat (99 mg, 0.64 mmol) in toluene (2 mL) was added to the solution of lithium (6-methyl-2-pyridyl)methyltris(pentafluorophenyl)borate (400 mg, 0.64 mmol) in toluene (5 mL) at room temperature. The reaction mixture was stirred at room temperature for 5 minutes. Then the resulting slurry was filtered and hexane was added into the filtrate until white precipitation appeared. The solution was stored at -20  $^\circ\text{C}$  overnight, affording a white solid which was filtered and dried under vacuum to give compound **2** with 1/2 toluene (276 mg, 55%).

X-ray quality crystals were grown from  $\text{CH}_2\text{Cl}_2$  solution at -20  $^\circ\text{C}$ .

$^1\text{H}$  NMR (400 MHz,  $\text{CD}_2\text{Cl}_2$ , 25  $^\circ\text{C}$ ):  $\delta$  [ppm] = 8.05 (t, 1H,  $^3J_{\text{H-H}} = 8.0$  Hz,  $\text{H4}(\text{py})$ ), 7.53(d, 1H,  $^3J_{\text{H-H}} = 8.0$  Hz,  $\text{H5}(\text{py})$ ), 7.40 (d, 1H,  $^3J_{\text{H-H}} = 8.0$  Hz,  $\text{H3}(\text{py})$ ), 7.40 (dd, 2H,  $^3J_{\text{H-H}} = 6.0$  Hz,  $^4J_{\text{H-H}} = 3.4$  Hz,  $\text{C(2)H}(\text{cat})$ ), 7.33 (dd, 2H,  $^3J_{\text{H-H}} = 6.0$  Hz,  $^4J_{\text{H-H}} =$

3.4 Hz, C(3)*H*(cat)), 3.30 (q, 2H,  $^2J_{B-H}$  = 6.1 Hz, CH<sub>2</sub>), 2.52 (s, 3H, CH<sub>3</sub>).

<sup>13</sup>C NMR (100 MHz, CD<sub>2</sub>Cl<sub>2</sub>, 25 °C): δ [ppm] = 171.06 (C2(py)), 153.23 (C6(py)), 148.54 (dm,  $^1J_{C-F}$  = 244 Hz, CF), 147.09 (C1(cat)), 146.16 (C4(py)), 139.08 (dm,  $^1J_{C-F}$  = 246 Hz, CF), 137.26 (dm,  $^1J_{C-F}$  = 240 Hz, CF), 126.25 (C5(py)), 125.55 (C3(cat)), 123.51 (C3(py)), 114.23 (C2(cat)), 35.75 (q,  $^1J_{C-B}$  = 38 Hz, CH<sub>2</sub>), 21.68 (CH<sub>3</sub>).

<sup>19</sup>F NMR (376 MHz, CD<sub>2</sub>Cl<sub>2</sub>, 25 °C): δ [ppm] = -132.41 (d, 6F,  $^3J_{F-F}$  = 22 Hz, *ortho*-C<sub>6</sub>F<sub>5</sub>), -161.51 (t, 3F,  $^3J_{F-F}$  = 20 Hz, *para*-C<sub>6</sub>F<sub>5</sub>), -165.83 (t, 6F,  $^3J_{F-F}$  = 20 Hz, *meta*-C<sub>6</sub>F<sub>5</sub>).

<sup>11</sup>B NMR (160 MHz, CD<sub>2</sub>Cl<sub>2</sub>, 25 °C): δ [ppm] = 26.9 (br s, catB), -13.2 (s, B(C<sub>6</sub>F<sub>5</sub>)<sub>3</sub>).

Element analysis: calcd for C<sub>31</sub>H<sub>12</sub>B<sub>2</sub>F<sub>15</sub>NO<sub>2</sub>+1/2toluene C 52.91, H 2.06, N 1.79%; found C 53.76, H 2.05, N 1.94%.

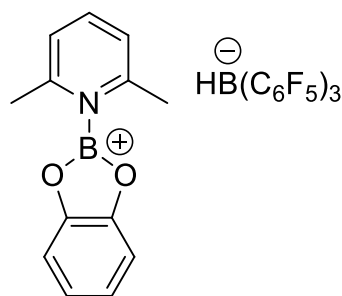

**Synthesis of [LutBcat][HB(C<sub>6</sub>F<sub>5</sub>)<sub>3</sub>]:** A solution of 2,6-lutidine (42mg, 0.39mmol) and HBcat (48mg, 0.40mmol) in hexane (3mL) was added to the solution of B(C<sub>6</sub>F<sub>5</sub>)<sub>3</sub> (200mg, 0.39mmol) in hexane (10mL). A white precipitation appeared immediately and the reaction mixture was stirred at room temperature for 10 minutes. Then the resulting slurry was filtered and washed with hexane (2x2mL), and the resulting solid was dried under vacuum to give compound [LutBcat][HB(C<sub>6</sub>F<sub>5</sub>)<sub>3</sub>] (211mg, 73%).

<sup>1</sup>H NMR (400 MHz, CD<sub>2</sub>Cl<sub>2</sub>, 25 °C): δ [ppm] = 8.45 (t, 1H,  $^3J_{H-H}$  = 8.0 Hz, H4(py)),

7.81(d, 2H,  $^3J_{\text{H-H}} = 8.0$  Hz,  $H3(\text{py})$ ), 7.53 (dd, 2H,  $^3J_{\text{H-H}} = 6.0$  Hz,  $^4J_{\text{H-H}} = 3.4$  Hz,  $\text{C}(2)H(\text{cat})$ ), 7.42 (dd, 2H,  $^3J_{\text{H-H}} = 6.0$  Hz,  $^4J_{\text{H-H}} = 3.4$  Hz,  $\text{C}(3)H(\text{cat})$ ), 3.58 (q, 1H,  $^1J_{\text{B-H}} = 87$  Hz,  $\text{BH}$ ), 2.83 (s, 6H,  $\text{CH}_3$ ).

$^{13}\text{C}$  NMR (100 MHz,  $\text{CD}_2\text{Cl}_2$ , 25 °C):  $\delta$  [ppm] = 157.12 ( $\text{C}2(\text{py})$ ) 149.12( $\text{C}4(\text{py})$ ), 148.61 (dm,  $^1J_{\text{C-F}} = 240$  Hz, CF), 147.11 ( $\text{C}2(\text{py})$ ), 138.30 (dm,  $^1J_{\text{C-F}} = 240$  Hz, CF), 136.79 (dm,  $^1J_{\text{C-F}} = 240$  Hz, CF), 126.84 ( $\text{C}3(\text{py})$ ), 126.04 ( $\text{C}3(\text{cat})$ ), 114.57 ( $\text{C}2(\text{cat})$ ), 22.01 ( $\text{CH}_3$ ).

$^{19}\text{F}$  NMR (376 MHz,  $\text{CD}_2\text{Cl}_2$ , 25 °C):  $\delta$  [ppm] = -133.98 (s, 6F, *ortho*-  $\text{C}_6\text{F}_5$ ), -164.34 (s, 3F, *para*-  $\text{C}_6\text{F}_5$ ), -167.37 (s, 6F, *meta*- $\text{C}_6\text{F}_5$ ).

$^{11}\text{B}$  NMR (160 MHz,  $\text{CD}_2\text{Cl}_2$ , 25 °C):  $\delta$  [ppm] = 26.8 (s, 1B,  $\text{Bcat}$ ) -25.4 (d, 1B,  $^1J_{\text{B-H}} = 91$  Hz,  $\text{BH}$ ).

Element analysis: calcd for  $\text{C}_{31}\text{H}_{14}\text{B}_2\text{F}_{15}\text{NO}_2$  C 50.38, H 1.91, N 1.90%; found C 50.48, H 1.86, N 2.10%.

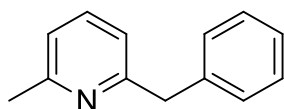

**Synthesis of 2-benzyl-6-methylpyridine:** A vigorously magnetically stirred mixture of PhI (594mg, 2.9mmol), **1a** (450mg, 0.73mmol),  $\text{Pd}(\text{PPh}_3)_4$  (84mg, 0.073 mmol), and *t*-BuOK (326mg, 2.9mmol) in xylene (6mL) was heated at 140 °C (oil bath) under  $\text{N}_2$  atmosphere for 24 h. After removal of the volatile under vacuum, the resulting oil was extracted with  $\text{CH}_2\text{Cl}_2$  (3x10mL). Then the volatile was removed under vacuum, and the resulting oil was purified by column chromatography (petroleum ether--EtOAc, 10:1) to give compound **4a** (110mg, 82%).

$^1\text{H}$  NMR (400 MHz,  $\text{CDCl}_3$ , 25 °C):  $\delta$  [ppm] = 7.44 (t, 1H), 7.19-7.32 (m, 5H), 6.97 (d, 1H), 6.85 (d, 1H), 4.14 (s, 2H), 2.55 (s, 3H).

$^{13}\text{C}$  NMR (100 MHz,  $\text{CDCl}_3$ , 25  $^\circ\text{C}$ ):  $\delta$  [ppm] = 160.51, 157.97, 139.77, 136.82, 129.31, 128.64, 126.42, 120.83, 120.09, 44.86, 24.69.

HRMS (ESI,  $m/z$ ): calcd for  $\text{C}_{13}\text{H}_{13}\text{N}$  [ $\text{M}+\text{H}^+$ ] 184.1126, found 184.1121.

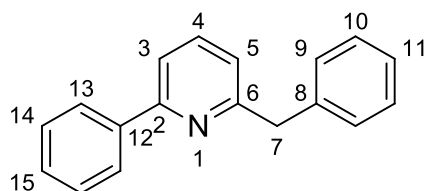

**Synthesis of 2-benzyl-6-phenylpyridine:** A vigorously magnetically stirred mixture of PhI (539mg, 2.6mmol), **1i** (450mg, 0.66mmol),  $\text{Pd}(\text{PPh}_3)_4$  (76mg, 0.066mol), and *t*-BuOK (296mg, 2.6mmol) in xylene (6mL) was heated at 140  $^\circ\text{C}$  (oil bath) under  $\text{N}_2$  atmosphere for 24 h. After removal of the volatile under vacuum, the resulting oil was extracted with  $\text{CH}_2\text{Cl}_2$  (3x10mL). Then the volatile was removed under vacuum, and the resulting oil was purified by column chromatography (petroleum ether--EtOAc, 20:1) to give **4i** (89mg, 55%).

$^1\text{H}$  NMR (400 MHz,  $\text{CDCl}_3$ , 25  $^\circ\text{C}$ ):  $\delta$  [ppm] = 8.03 (d, 2H,  $^3J_{\text{H-H}} = 7.2$  Hz, *H*13), 7.64 (t, 1H,  $^3J_{\text{H-H}} = 7.7$  Hz, *H*4), 7.56 (d, 1H,  $^3J_{\text{H-H}} = 7.7$  Hz, *H*3), 7.49 (t, 2H,  $^3J_{\text{H-H}} = 7.6$  Hz, *H*14), 7.44 (t, 2H,  $^3J_{\text{H-H}} = 7.2$  Hz, *H*15), 7.37 (d, 2H,  $^3J_{\text{H-H}} = 7.6$  Hz, *H*9), 7.35 (t, 2H,  $^3J_{\text{H-H}} = 7.6$  Hz, *H*10), 7.26 (t, 1H,  $^3J_{\text{H-H}} = 7.6$  Hz, *H*11), 7.03 (d, 2H,  $^3J_{\text{H-H}} = 7.5$  Hz, *H*5), 4.27 (s, 2H, *H*7).

$^{13}\text{C}$  NMR (100 MHz,  $\text{CDCl}_3$ , 25  $^\circ\text{C}$ ):  $\delta$  [ppm] = 161.03 (*C*6), 156.98 (*C*2), 139.84 (*C*8), 139.77 (*C*12), 137.27 (*C*4), 129.39 (*C*9), 128.92 (*C*15), 128.82 (*C*10), 128.65 (*C*14), 127.14 (*C*13), 126.44 (*C*11), 121.47 (*C*5), 118.11 (*C*3), 45.06 (*C*7).

HRMS (ESI,  $m/z$ ): calcd for  $\text{C}_{18}\text{H}_{15}\text{N}$  [ $\text{M}+\text{H}^+$ ] 246.1287, found 246.1277.

## II. Mechanism study

### Kinetic isotope effect experiments

A solution of 2,6-lutidine (8.4mg, 0.078mmol) or 2,6-lutidine-d<sub>6</sub> (8.8mg, 0.078mmol), and HBcat (1.0mg, 0.0083mmol) in CD<sub>2</sub>Cl<sub>2</sub> (0.2mL) was added to the solution of B(C<sub>6</sub>F<sub>5</sub>)<sub>3</sub> (40mg, 0.078mmol) in CD<sub>2</sub>Cl<sub>2</sub> (0.3mL). The resulting solution was transferred to a J. Young NMR tube, and analyzed by <sup>11</sup>B NMR spectroscopy. From the <sup>11</sup>B NMR spectra, the initial rates for the formation of **1a** were determined. KIE  $k_H/k_D = 5.8$ .

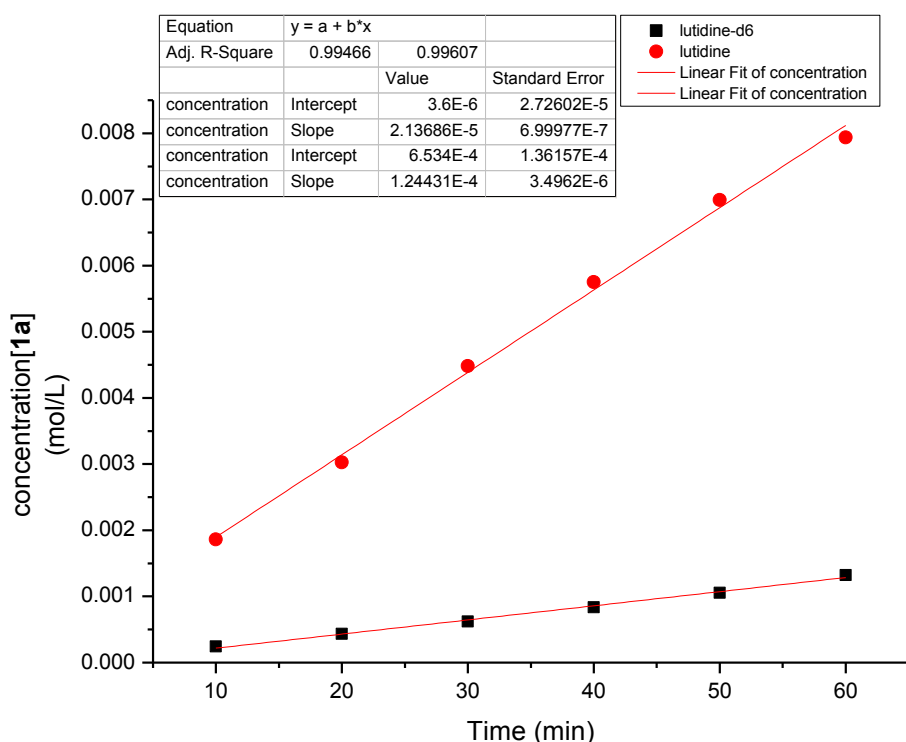

Figure S1 Formation of **1a** when 2,6-lutidine or 2,6-lutidine-d<sub>6</sub> was used

### Equilibrium reaction experiments

A solution of [2,6-Me<sub>2</sub>C<sub>5</sub>H<sub>3</sub>NH][HB(C<sub>6</sub>F<sub>5</sub>)<sub>3</sub>] (12.6mg, 0.020mmol) in CD<sub>2</sub>Cl<sub>2</sub> (0.2mL) was added to the solution of **2** (15.0mg, 0.020mmol) in CD<sub>2</sub>Cl<sub>2</sub> (0.3mL). The resulting solution was transferred to a J. Young NMR tube, and <sup>1</sup>H NMR spectra was carried out to calculate the equilibrium constant of this reaction.

A solution of **1a** (12.5mg, 0.020mmol) in CD<sub>2</sub>Cl<sub>2</sub> (0.2mL) was added to the solution of [2,6-lutidine/Bcat][HB(C<sub>6</sub>F<sub>5</sub>)<sub>3</sub>] (15.0mg, 0.020mmol) in CD<sub>2</sub>Cl<sub>2</sub> (0.3mL). The resulting solution was transferred to a J. Young NMR tube, and <sup>1</sup>H NMR spectra was carried out to calculate the equilibrium constant of this reaction.

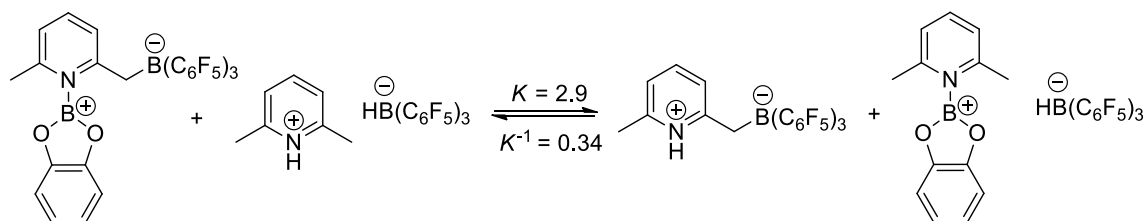



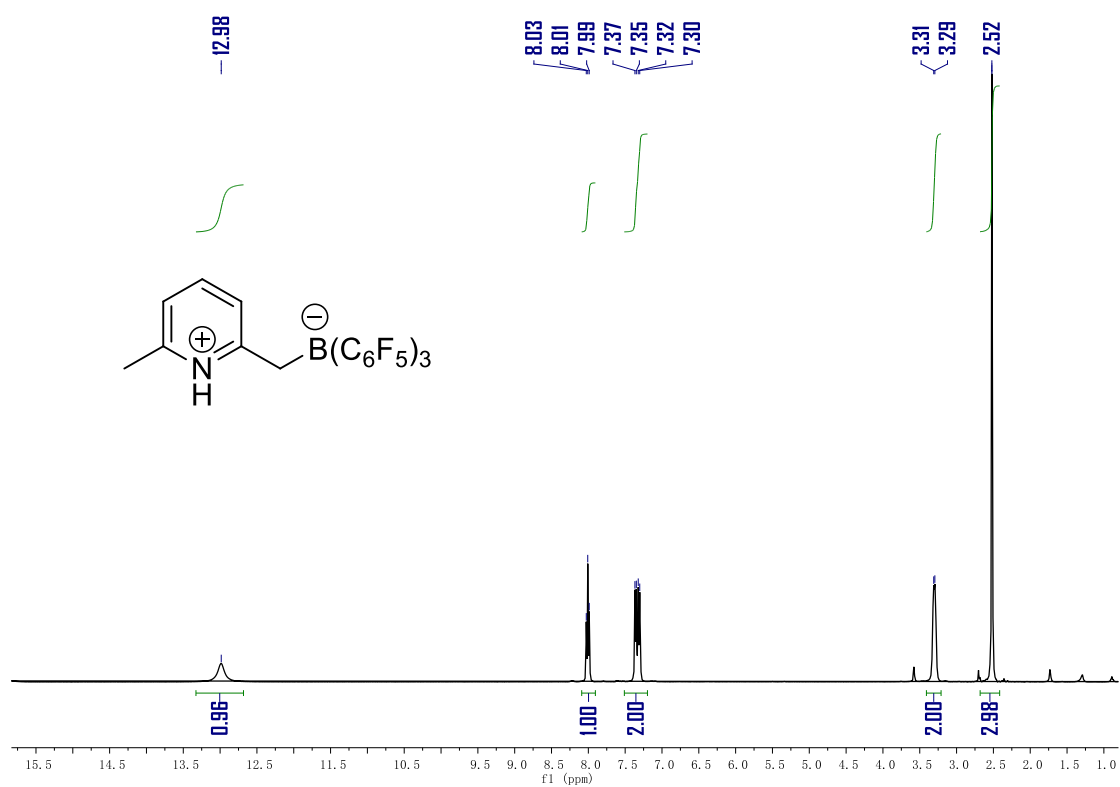

Figure S2: <sup>1</sup>H NMR spectrum of **1a** in THF-d<sub>8</sub>

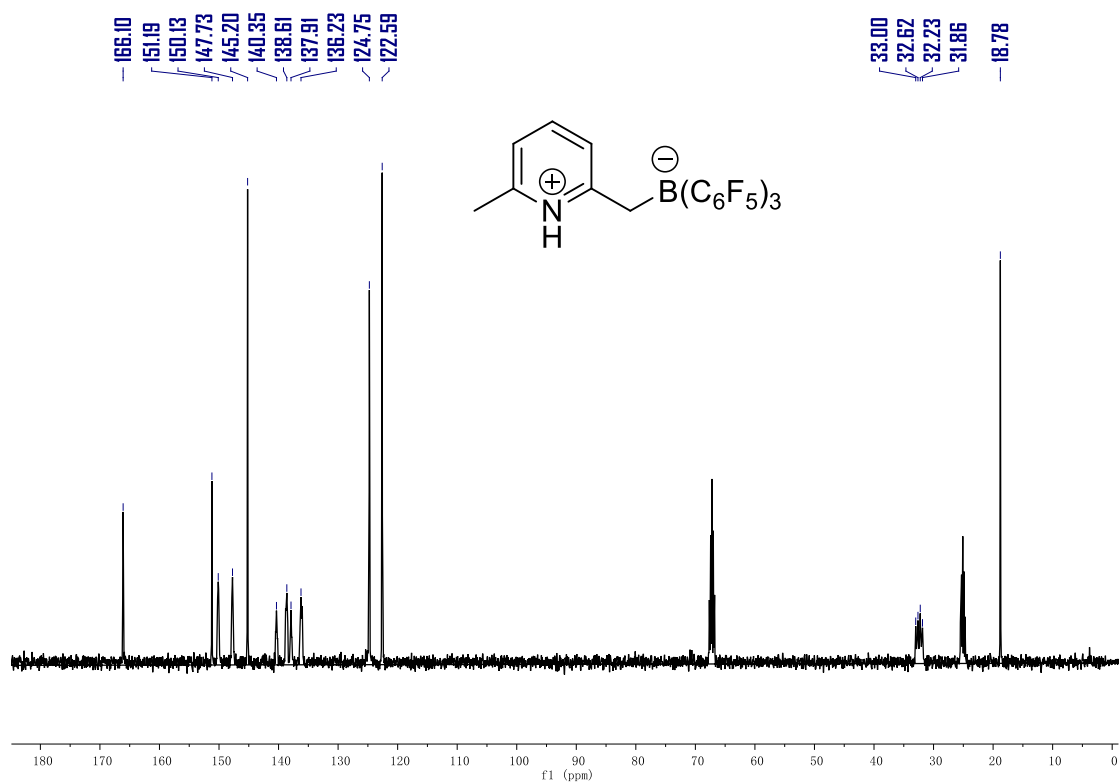

Figure S3: <sup>13</sup>C NMR spectrum of **1a** in THF-d<sub>8</sub>

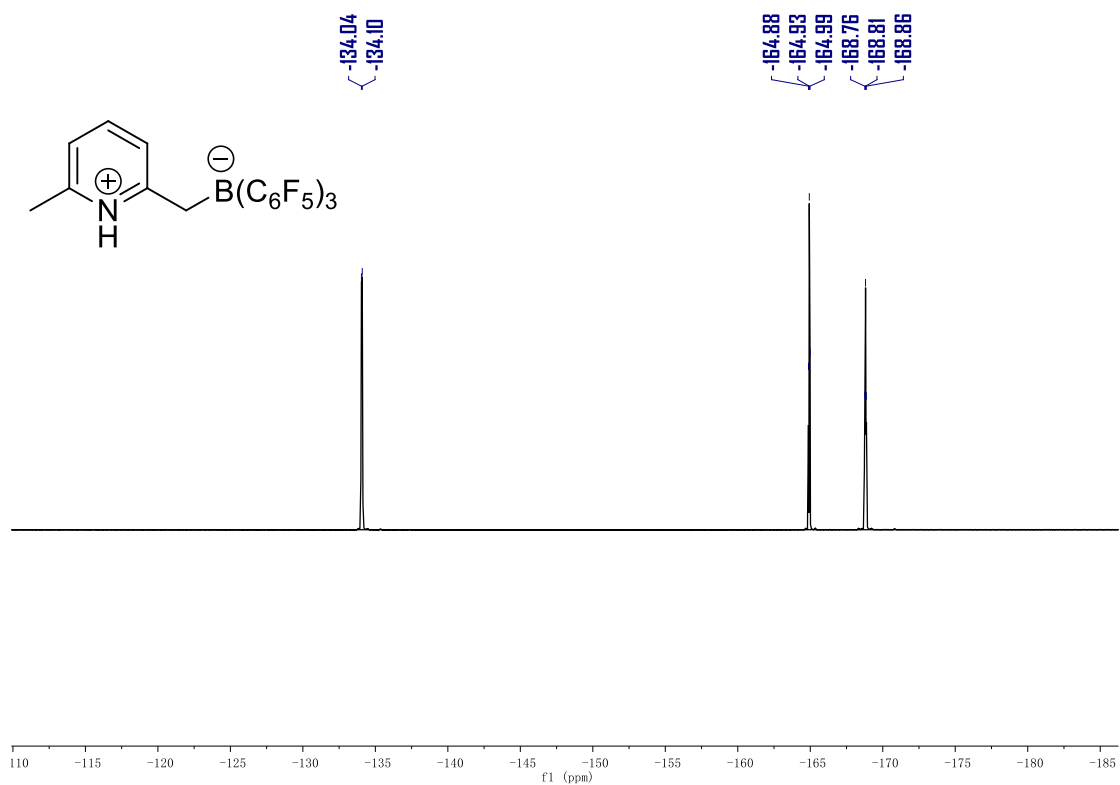

Figure S4: <sup>19</sup>F NMR spectrum of **1a** in THF-d<sub>8</sub>

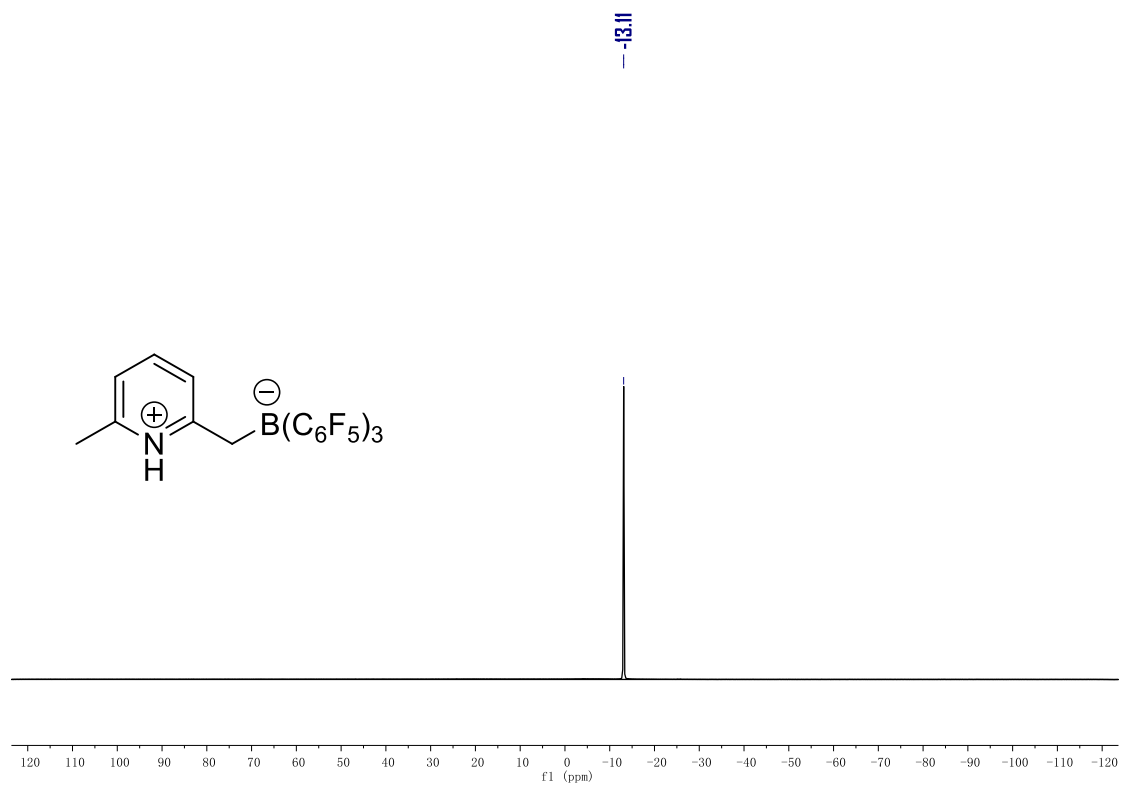

Figure S5: <sup>11</sup>B NMR spectrum of **1a** in THF-d<sub>8</sub>

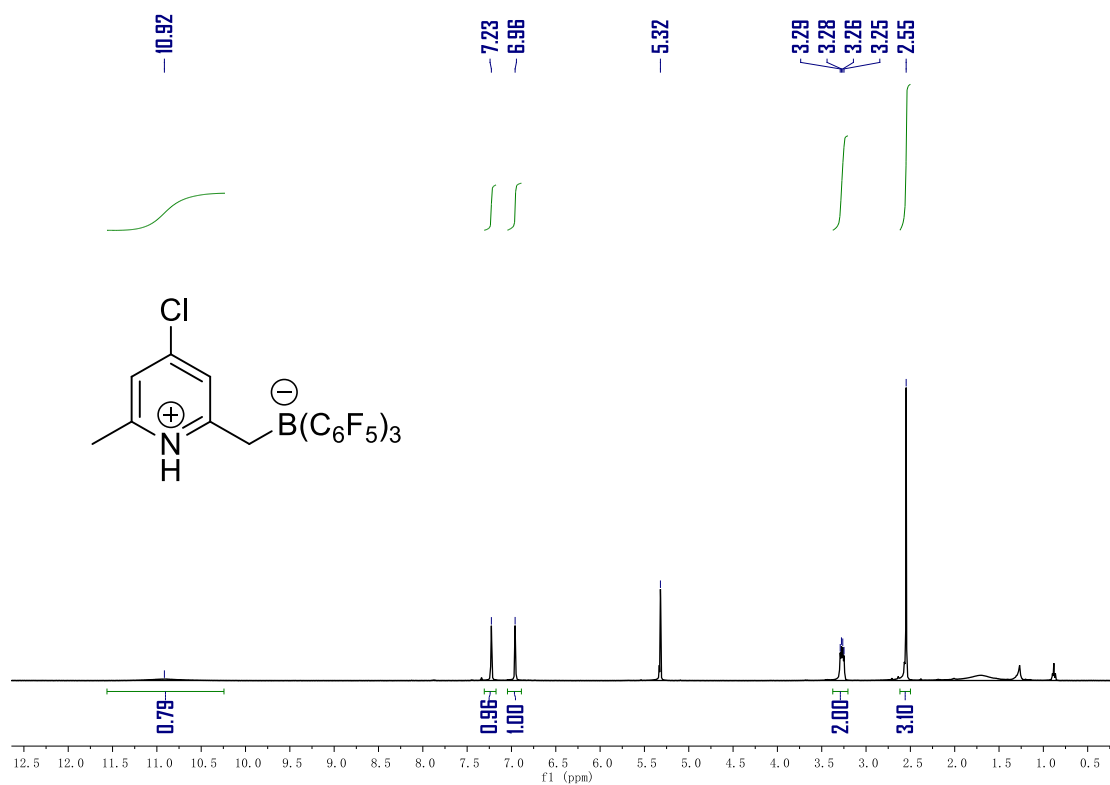

Figure S6: <sup>1</sup>H NMR spectrum of **1d** in CD<sub>2</sub>Cl<sub>2</sub>

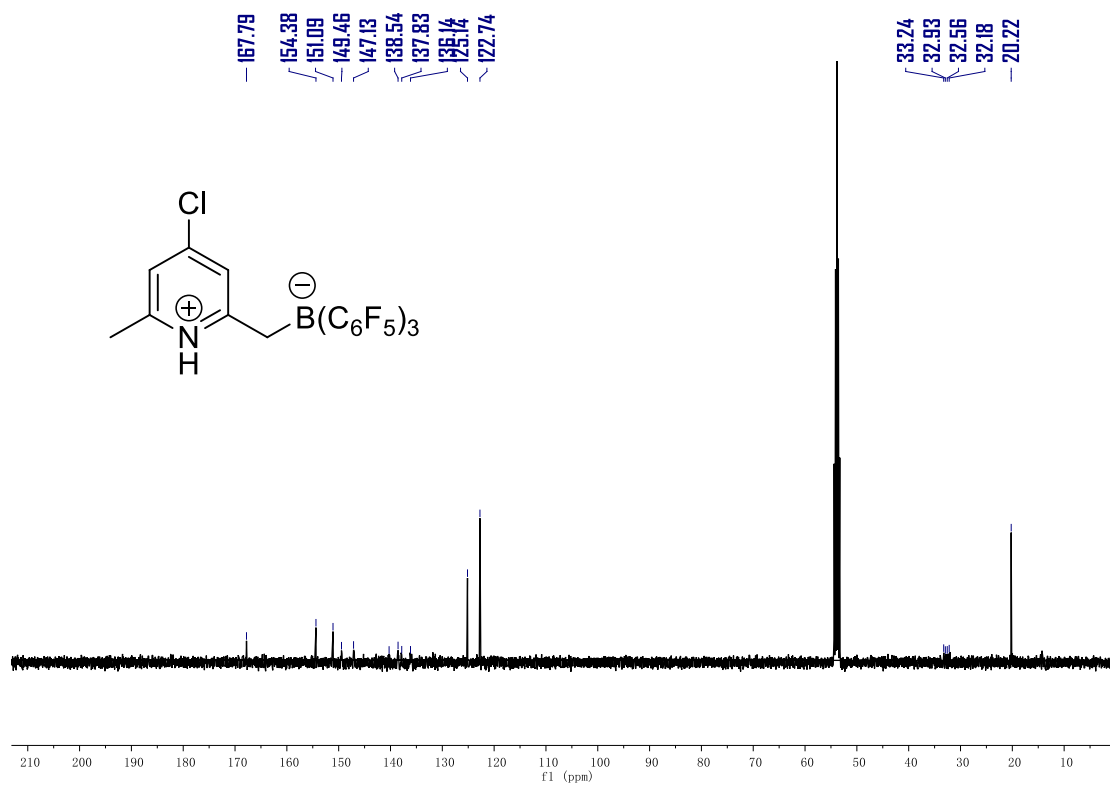

Figure S7: <sup>13</sup>C NMR spectrum of **1d** in CD<sub>2</sub>Cl<sub>2</sub>

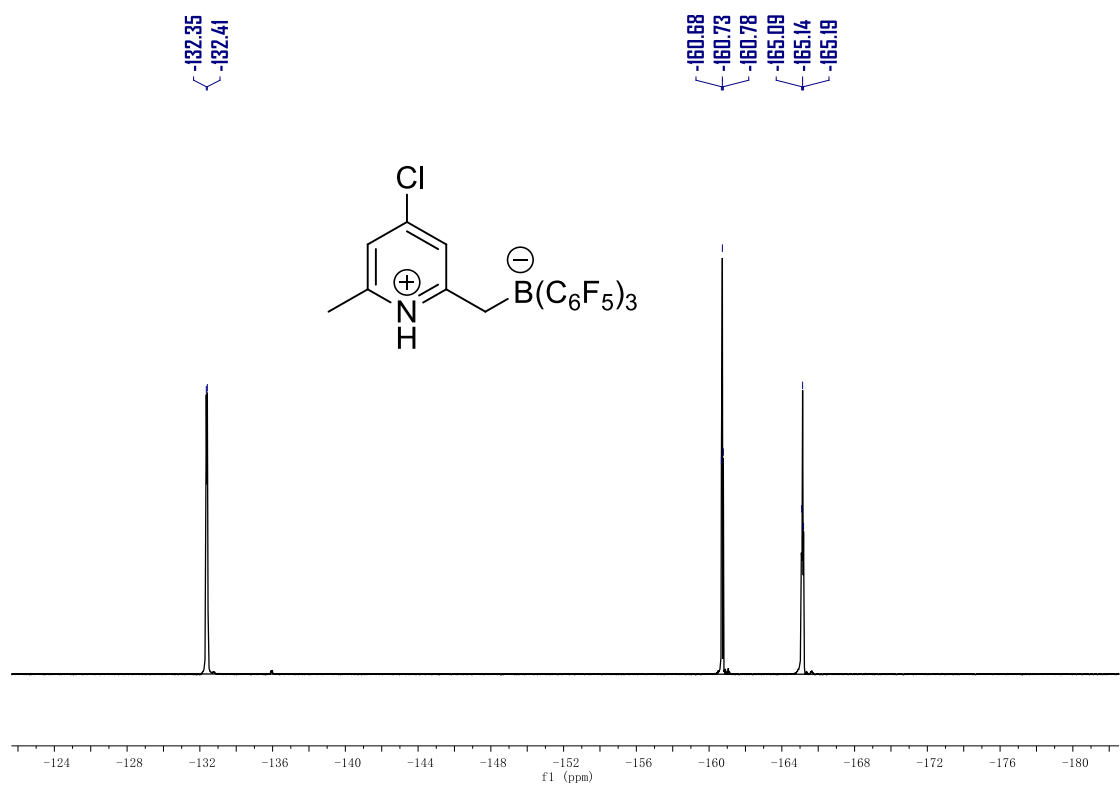

Figure S8: <sup>19</sup>F NMR spectrum of **1d** in CD<sub>2</sub>Cl<sub>2</sub>

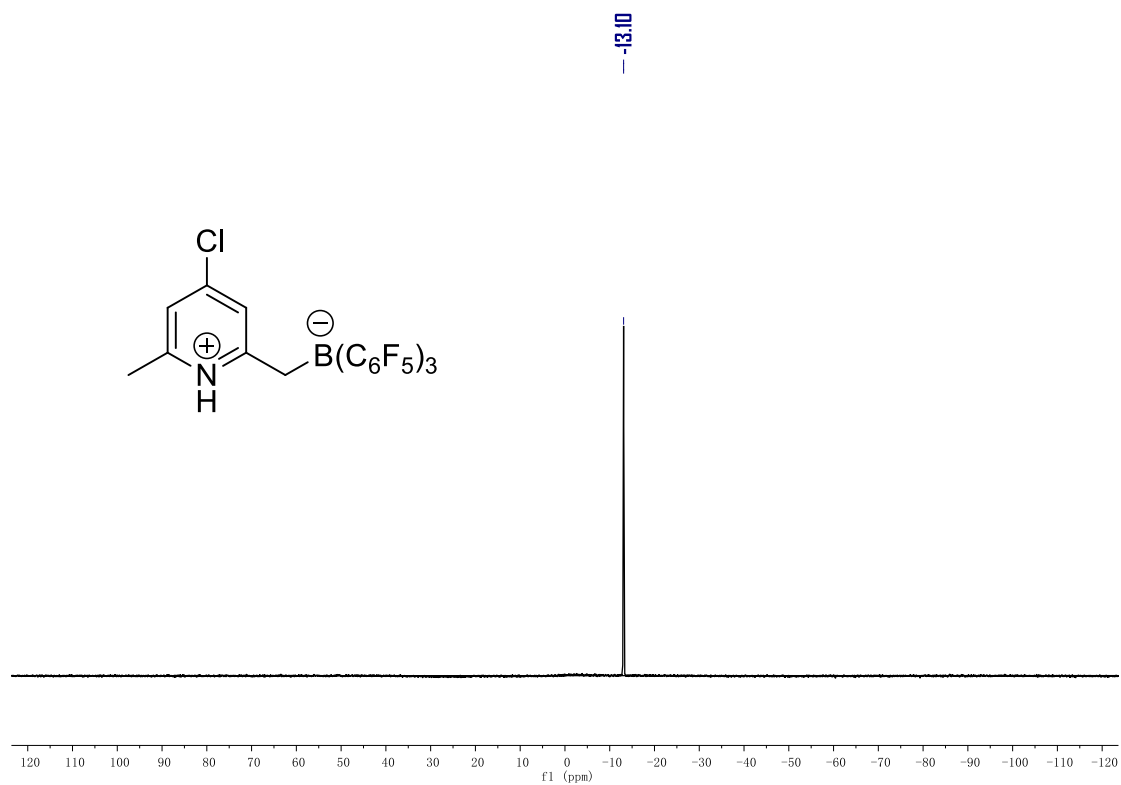

Figure S9: <sup>11</sup>B NMR spectrum of **1d** in CD<sub>2</sub>Cl<sub>2</sub>

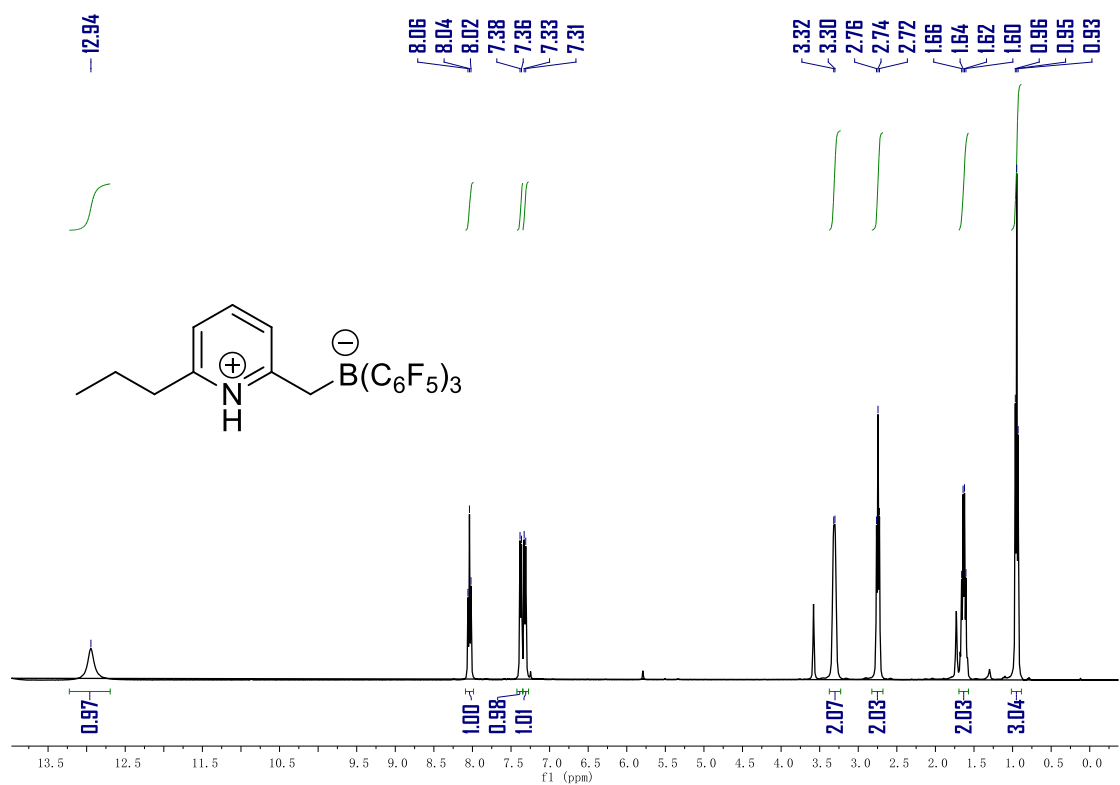

Figure S10: <sup>1</sup>H NMR spectrum of **1e** in THF-d<sub>8</sub>

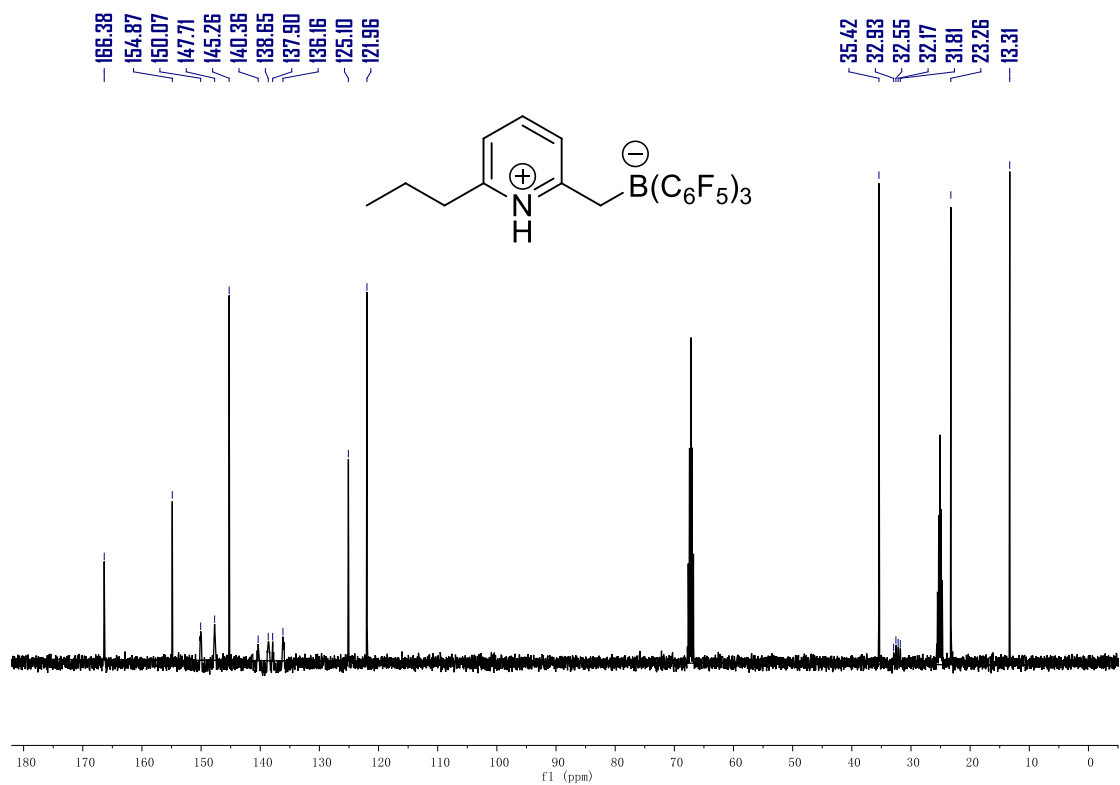

Figure S11: <sup>13</sup>C NMR spectrum of **1e** in THF- d<sub>8</sub>

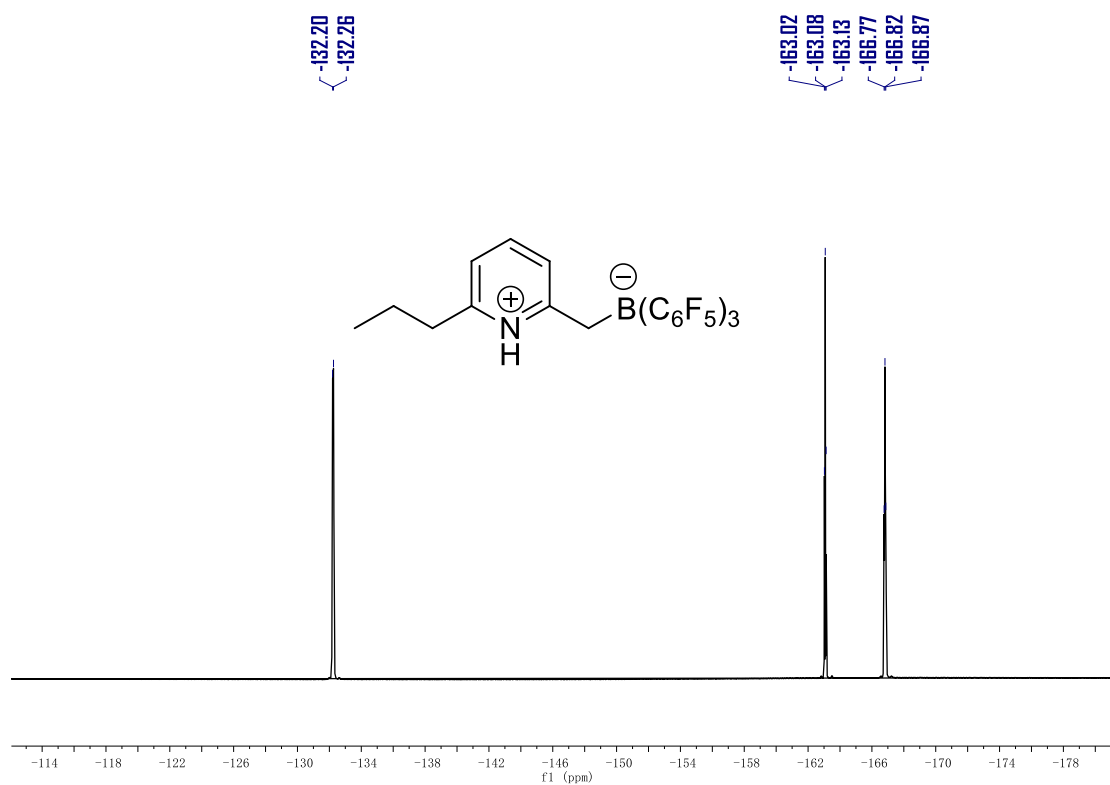

Figure S12: <sup>19</sup>F NMR spectrum of **1e** in THF- d<sub>8</sub>

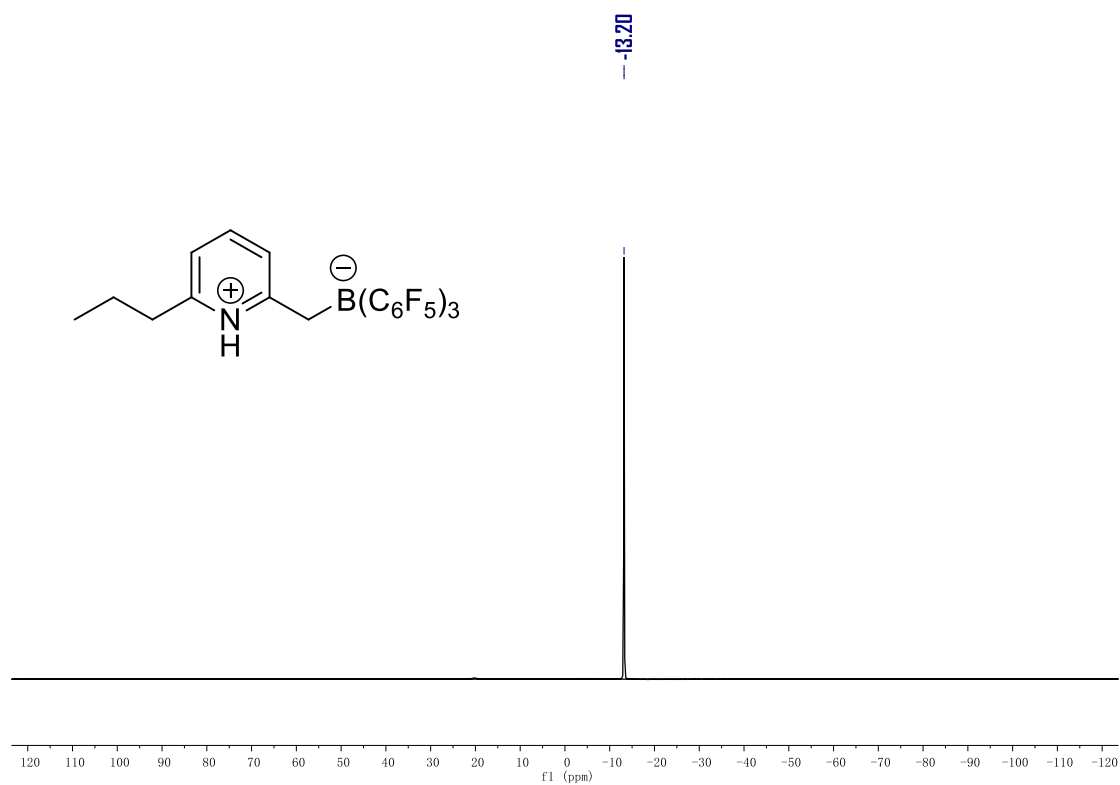

Figure S13: <sup>11</sup>B NMR spectrum of **1e** in THF- d<sub>8</sub>

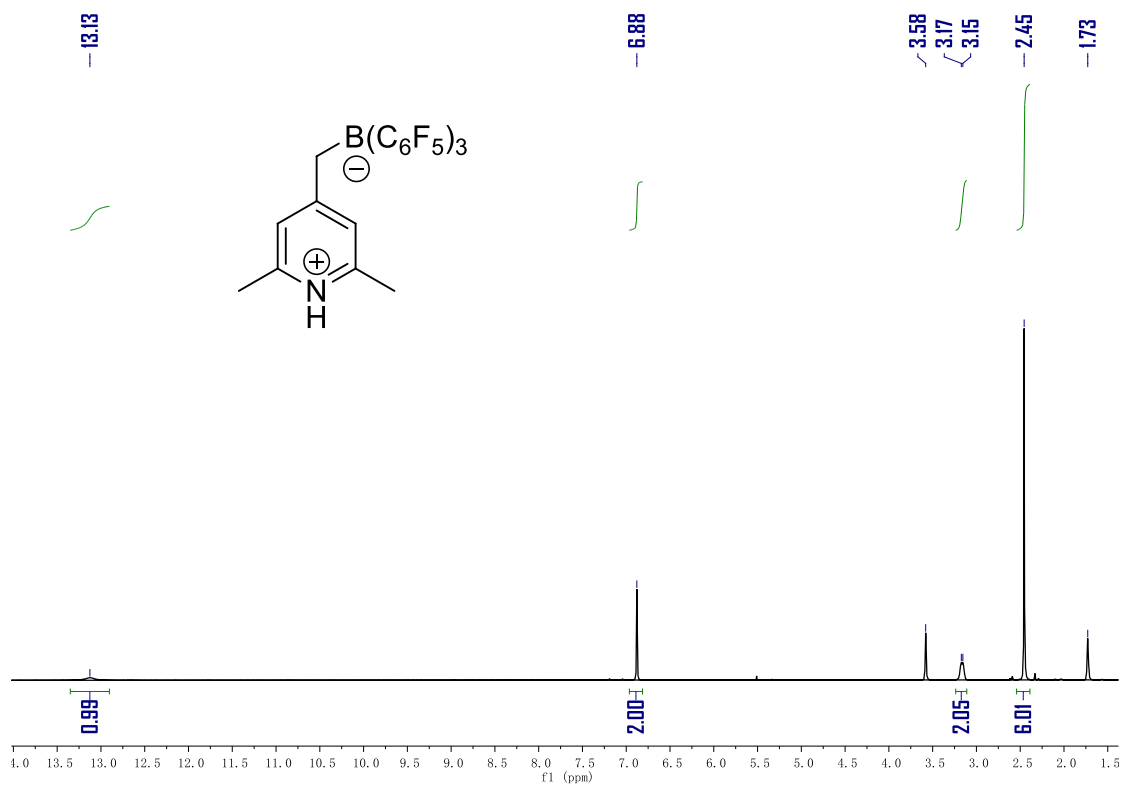

Figure S14: <sup>1</sup>H NMR spectrum of **1f** in THF-*d*<sub>8</sub>

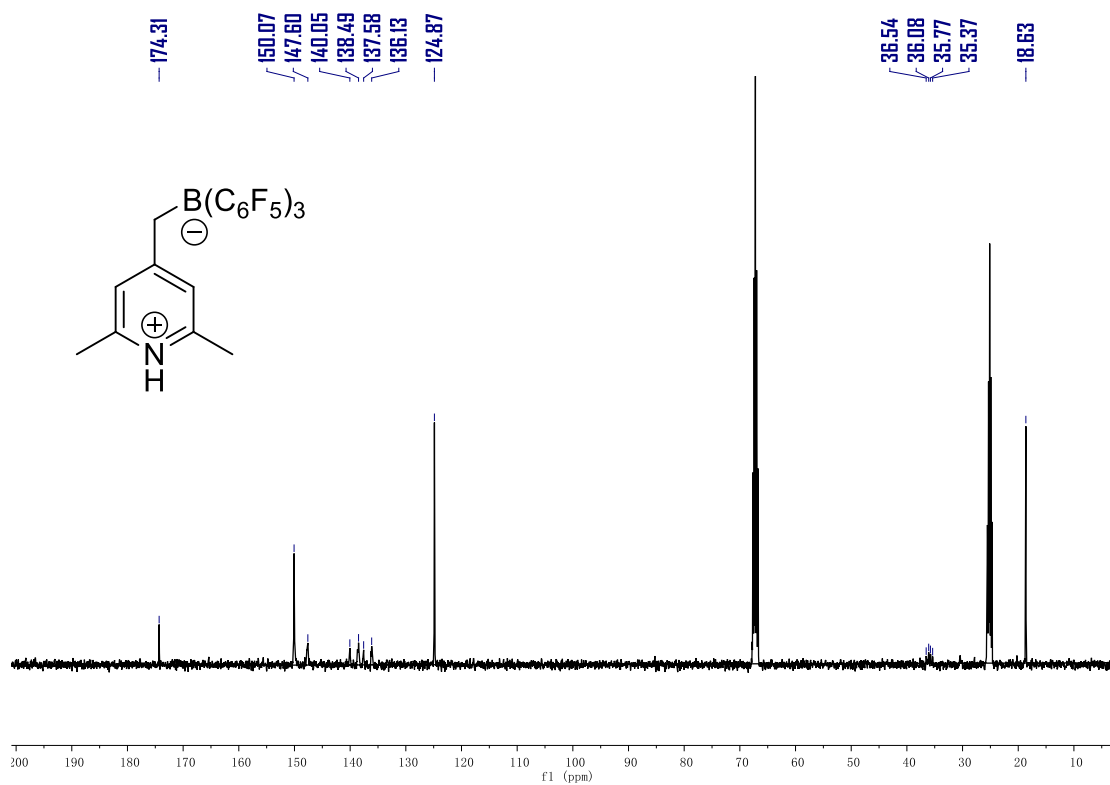

Figure S15: <sup>13</sup>C NMR spectrum of **1f** in THF-*d*<sub>8</sub>

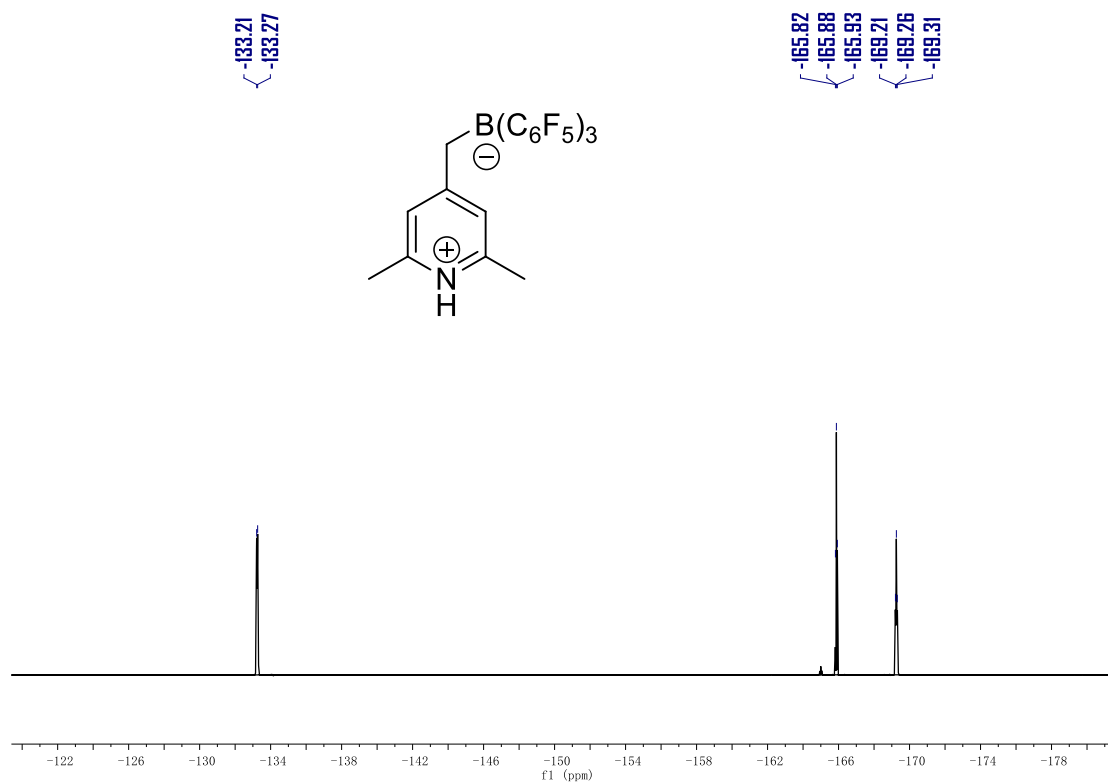

Figure S16:  $^{19}\text{F}$  NMR spectrum of **1f** in  $\text{THF-}d_8$

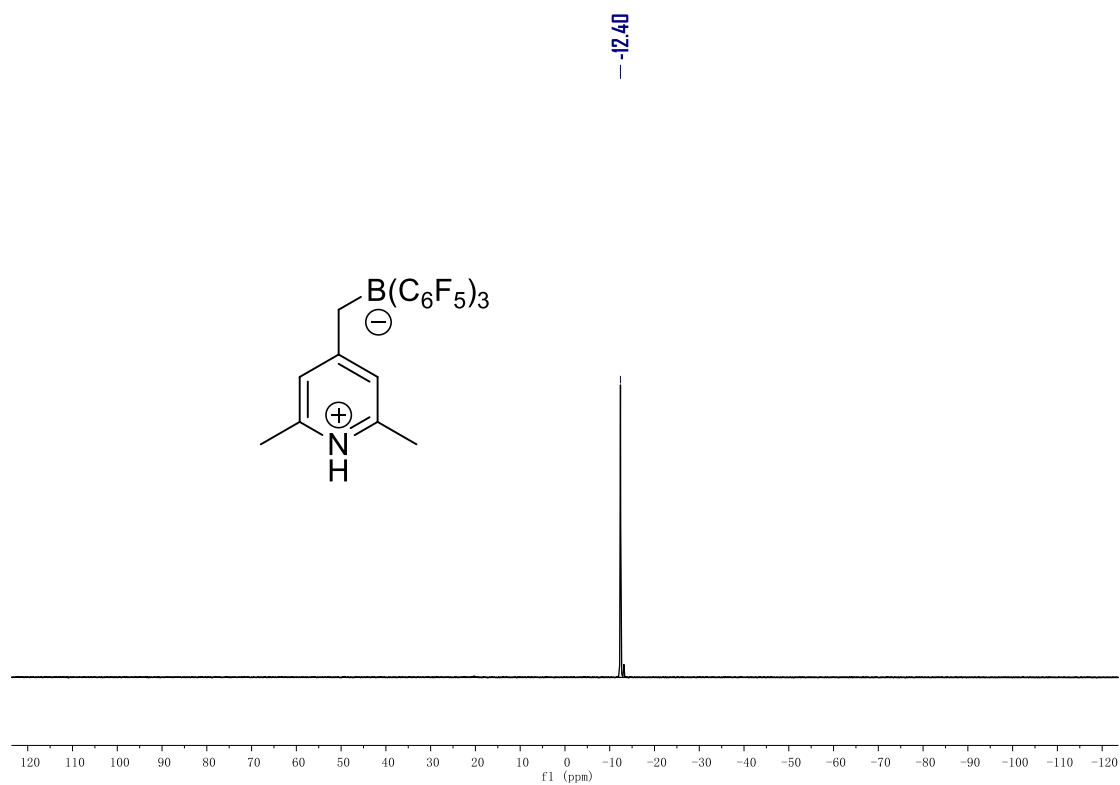

Figure S17:  $^{11}\text{B}$  NMR spectrum of **1f** in  $\text{THF-}d_8$



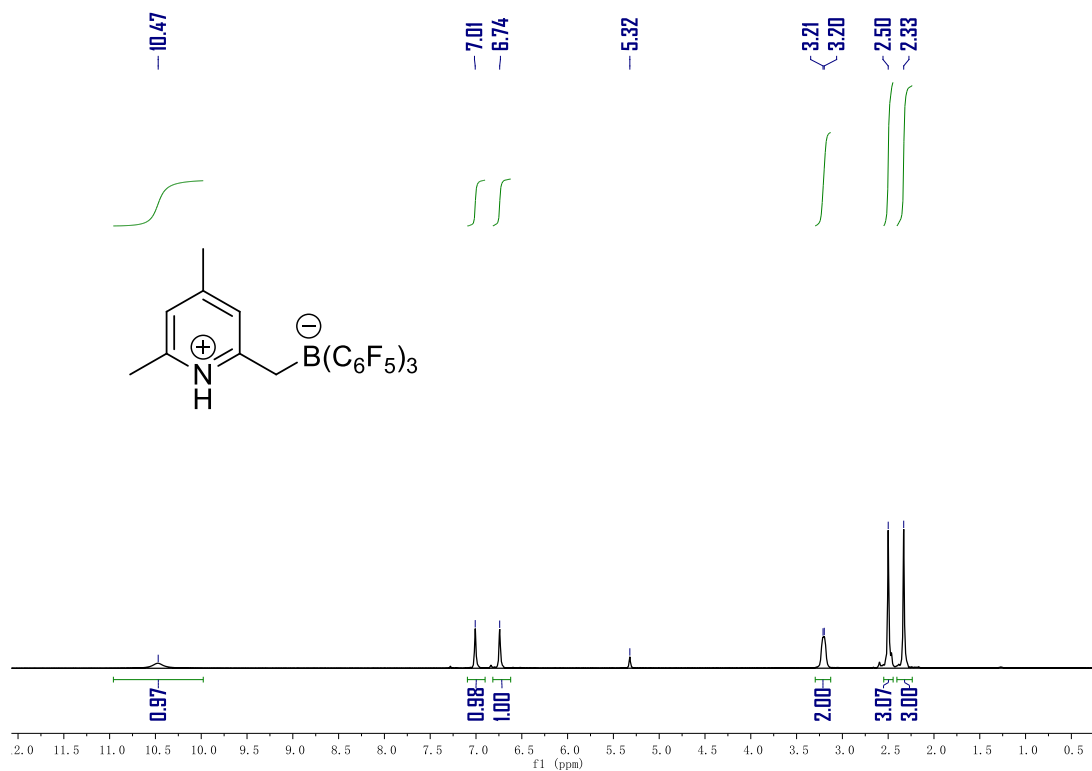

Figure S18: <sup>1</sup>H NMR spectrum of **1f'** in CD<sub>2</sub>Cl<sub>2</sub>

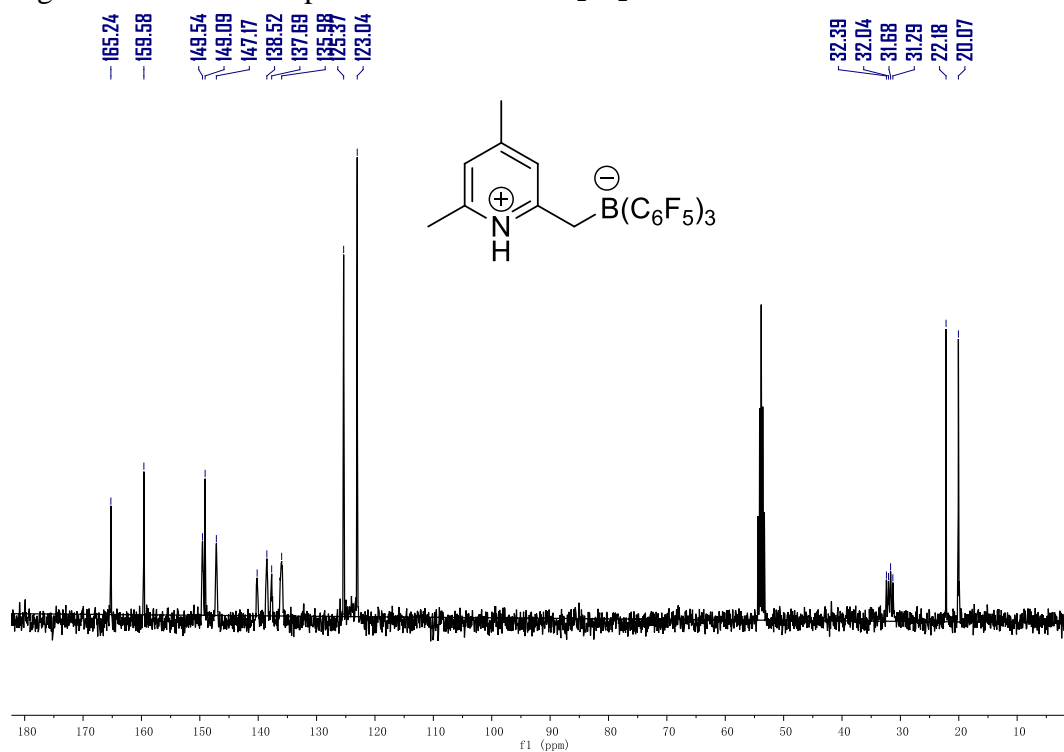

Figure S19: <sup>13</sup>C NMR spectrum of **1f'** in CD<sub>2</sub>Cl<sub>2</sub>

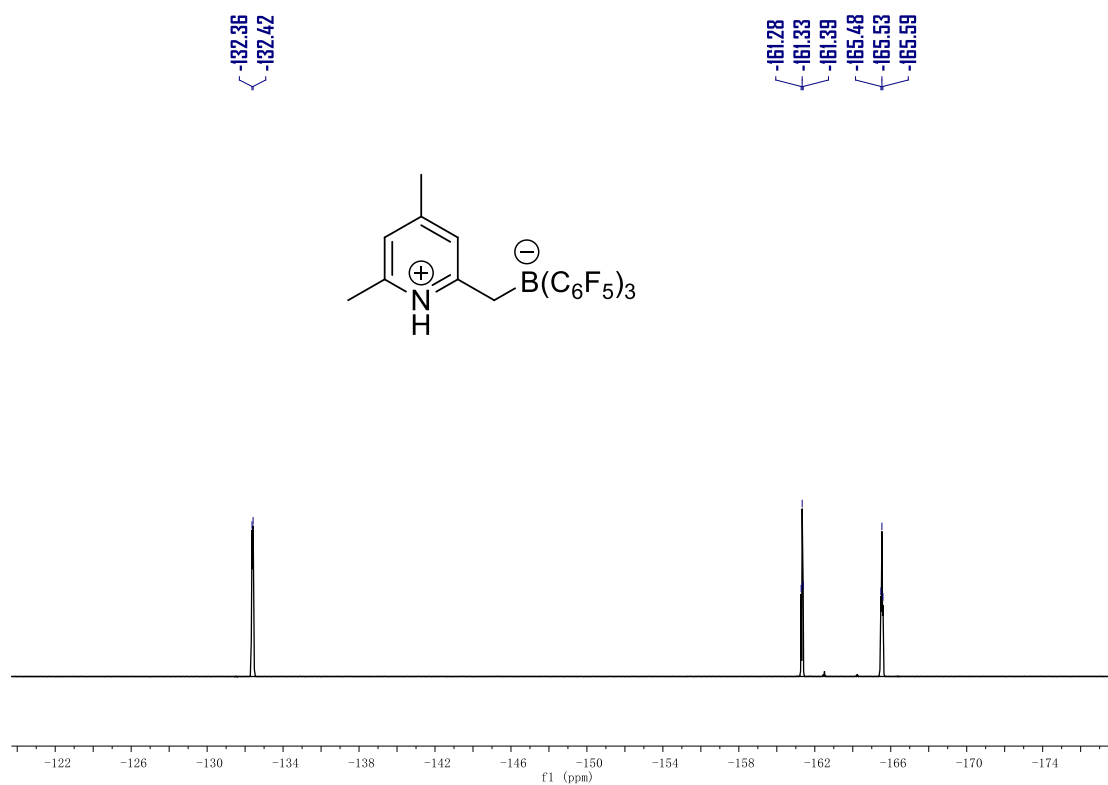

Figure S20:  $^{19}\text{F}$  NMR spectrum of **1f'** in  $\text{CD}_2\text{Cl}_2$

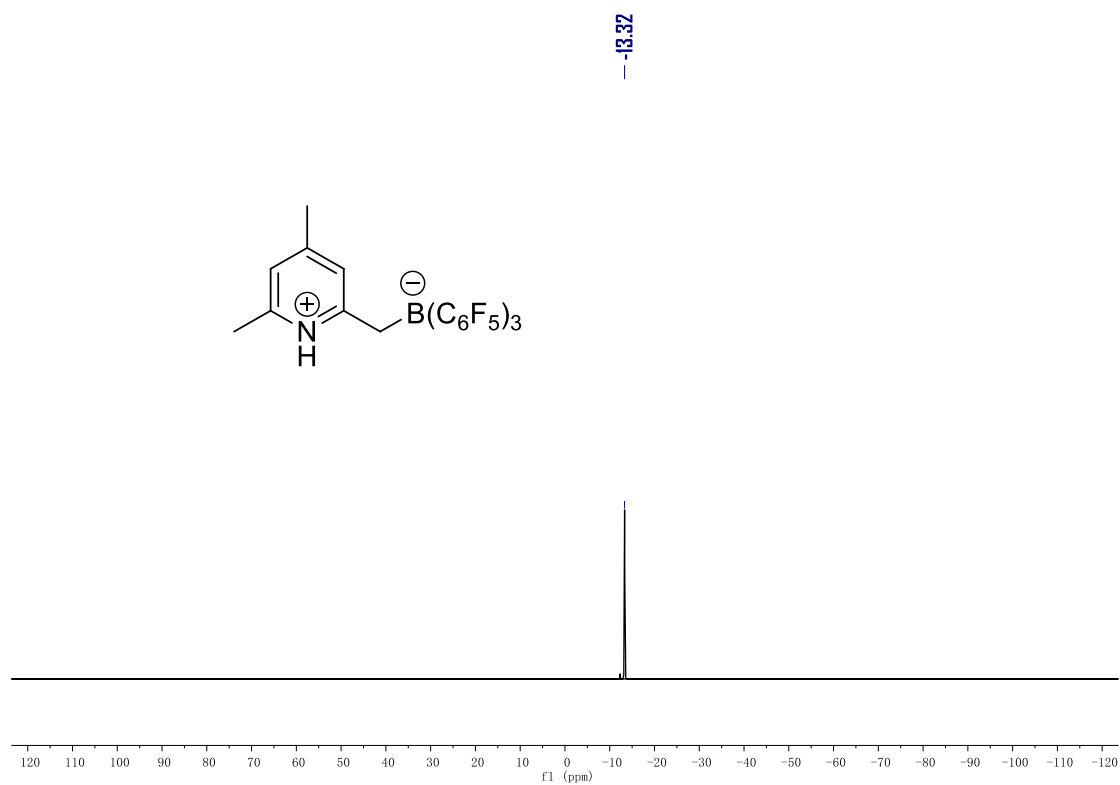

Figure S21:  $^{11}\text{B}$  NMR spectrum of **1f'** in  $\text{CD}_2\text{Cl}_2$

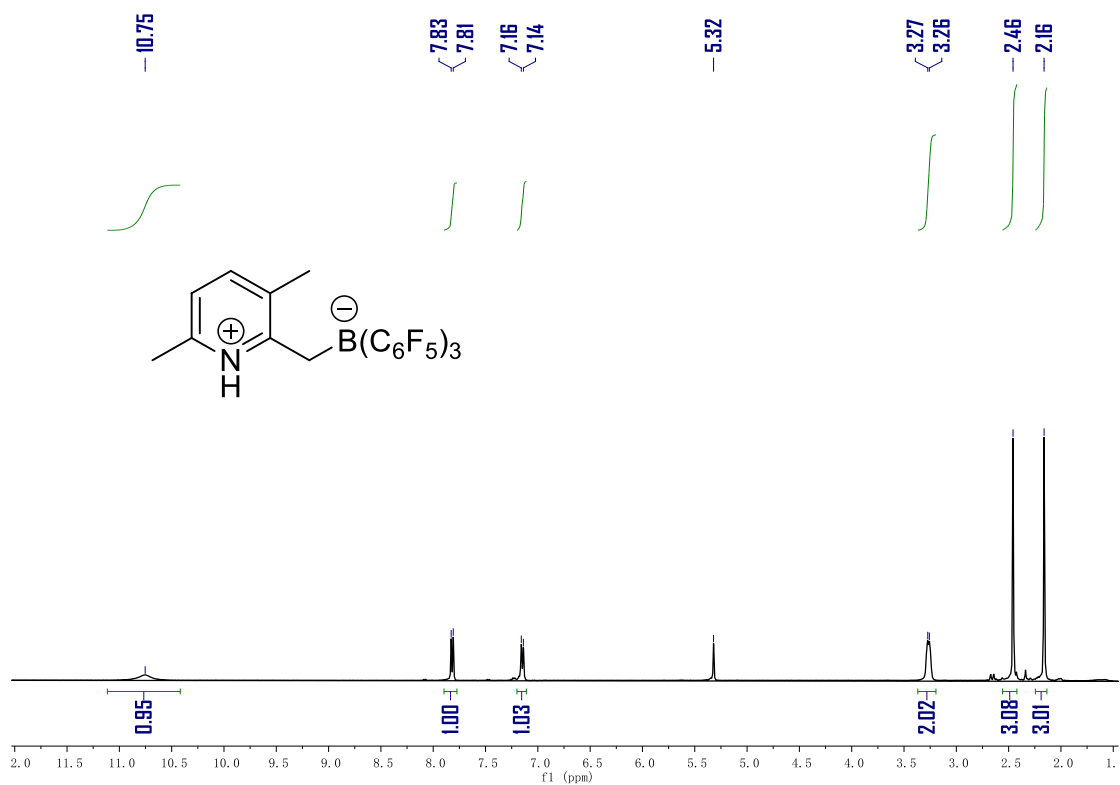

Figure S22: <sup>1</sup>H NMR spectrum of **1g** in CD<sub>2</sub>Cl<sub>2</sub>

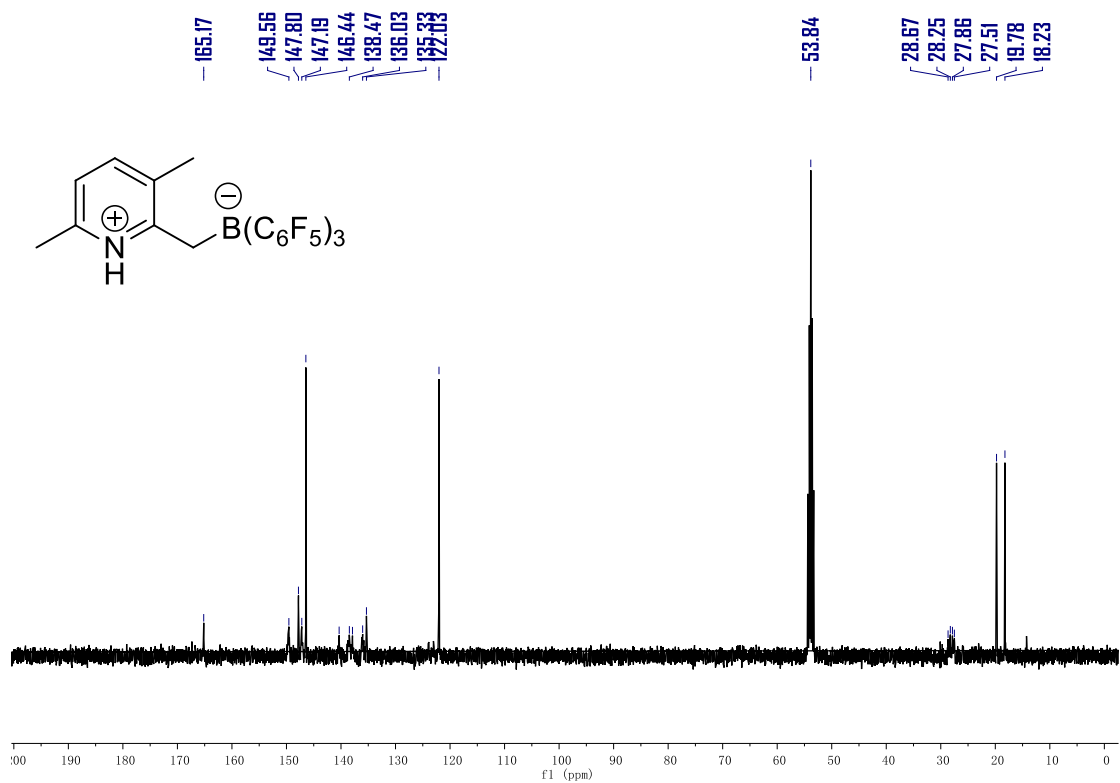

Figure S23: <sup>13</sup>C NMR spectrum of **1g** in CD<sub>2</sub>Cl<sub>2</sub>

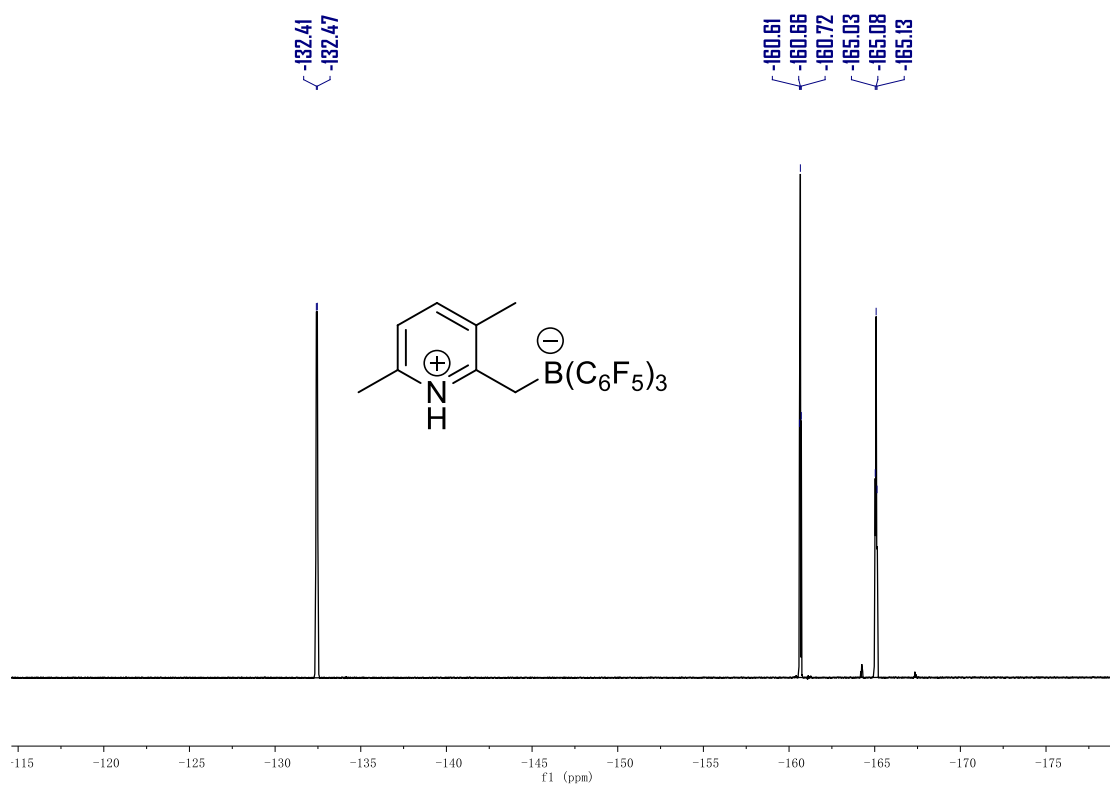

Figure S24: <sup>19</sup>F NMR spectrum of **1g** in CD<sub>2</sub>Cl<sub>2</sub>

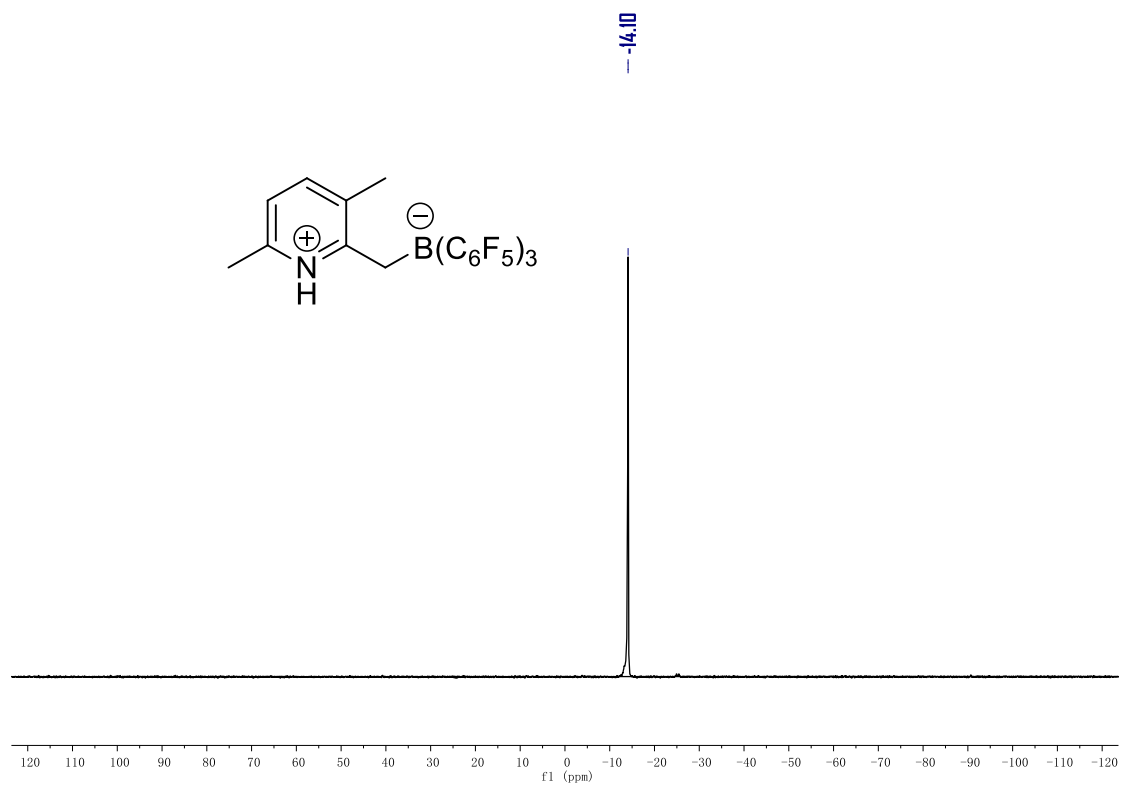

Figure S25: <sup>11</sup>B NMR spectrum of **1g** in CD<sub>2</sub>Cl<sub>2</sub>

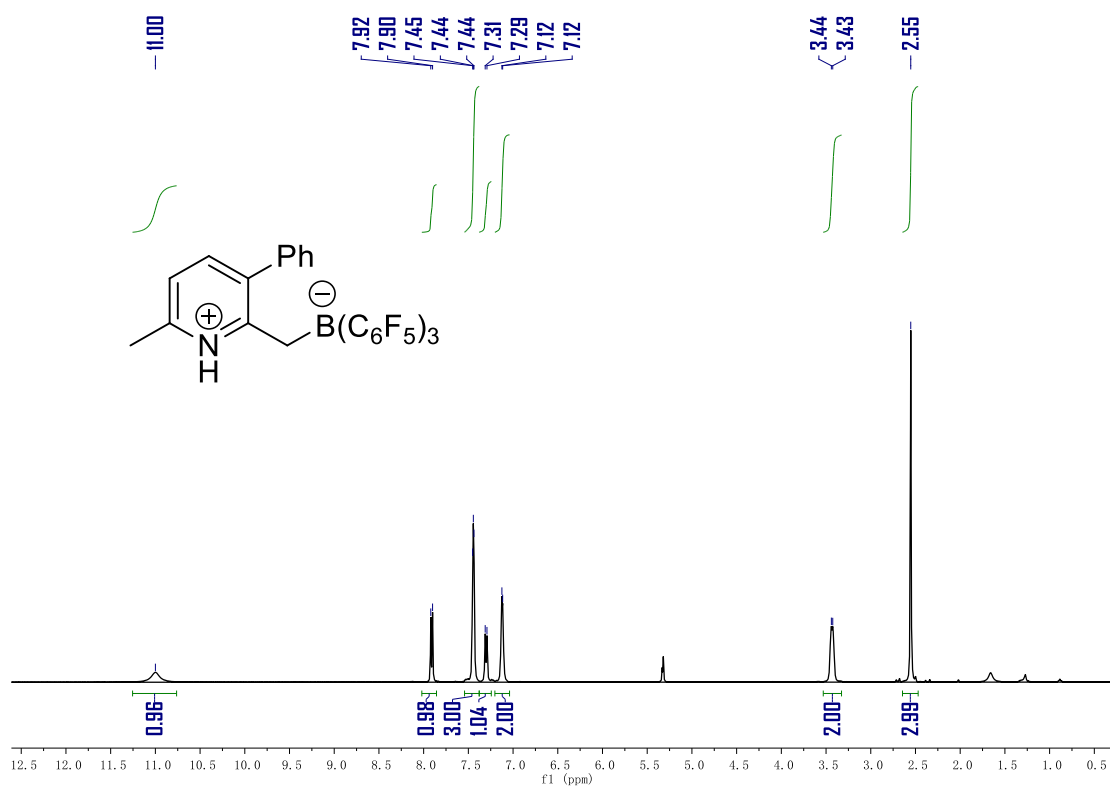

Figure S26: <sup>1</sup>H NMR spectrum of **1h** in CD<sub>2</sub>Cl<sub>2</sub>

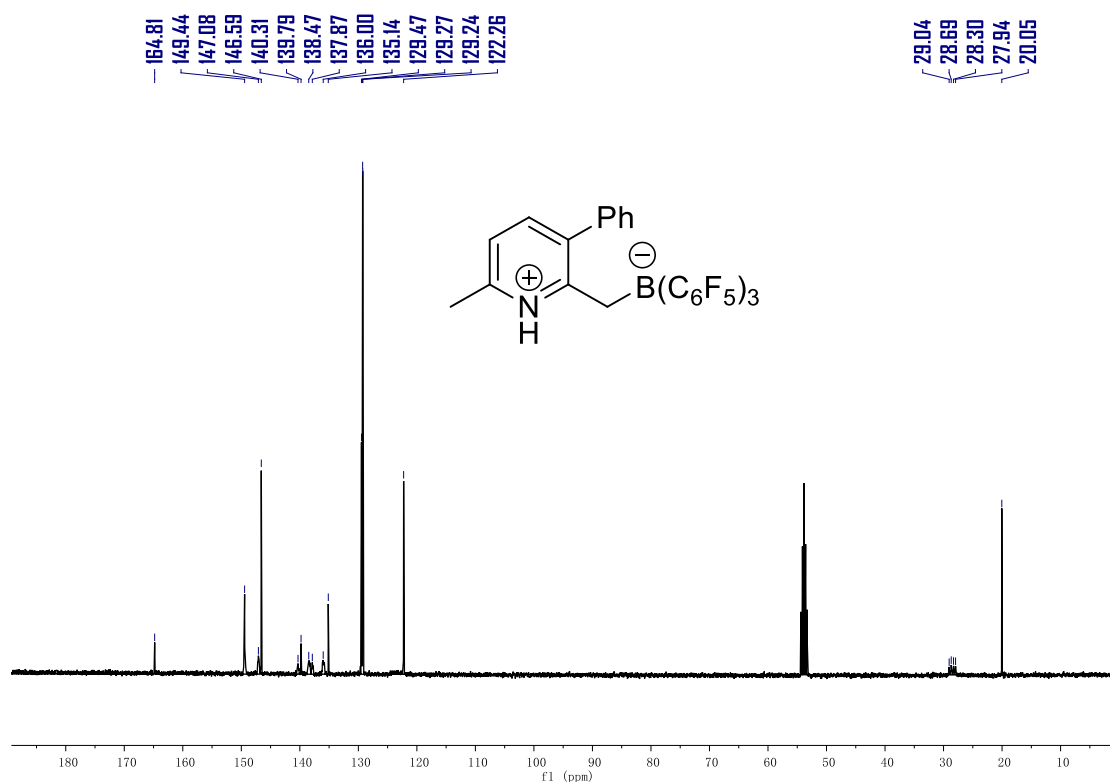

Figure S27: <sup>13</sup>C NMR spectrum of **1h** in CD<sub>2</sub>Cl<sub>2</sub>

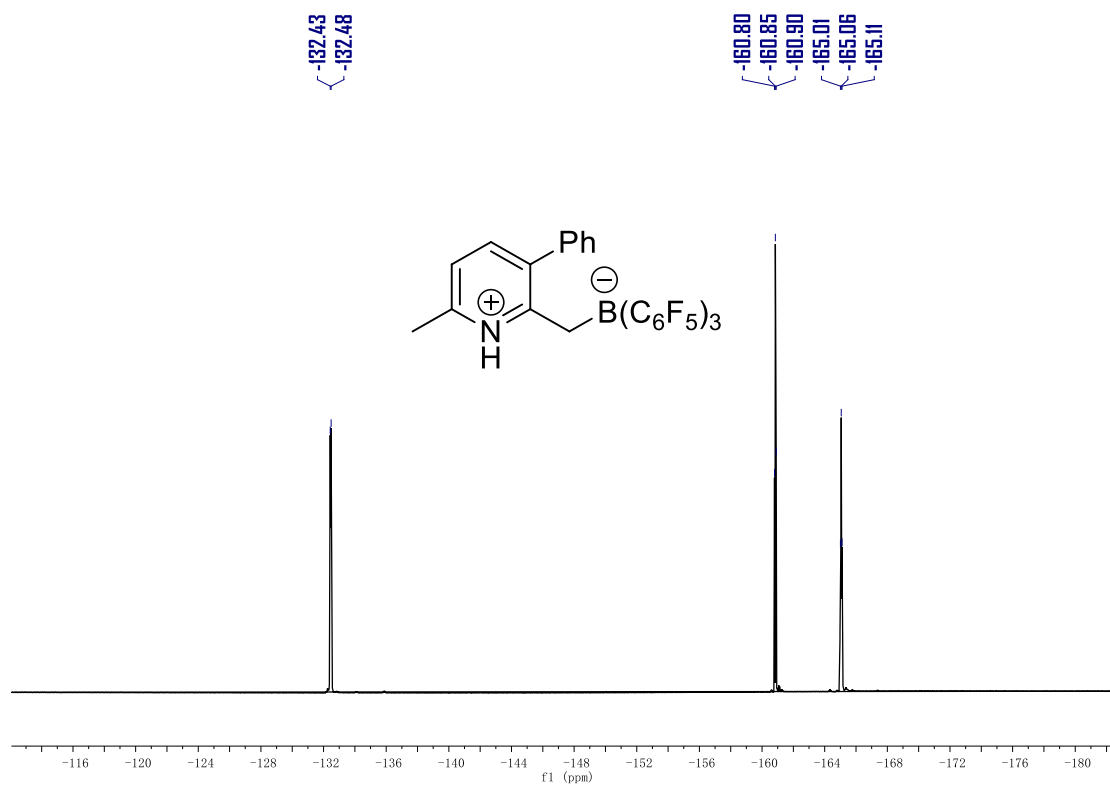

Figure S28: <sup>19</sup>F NMR spectrum of **1h** in CD<sub>2</sub>Cl<sub>2</sub>

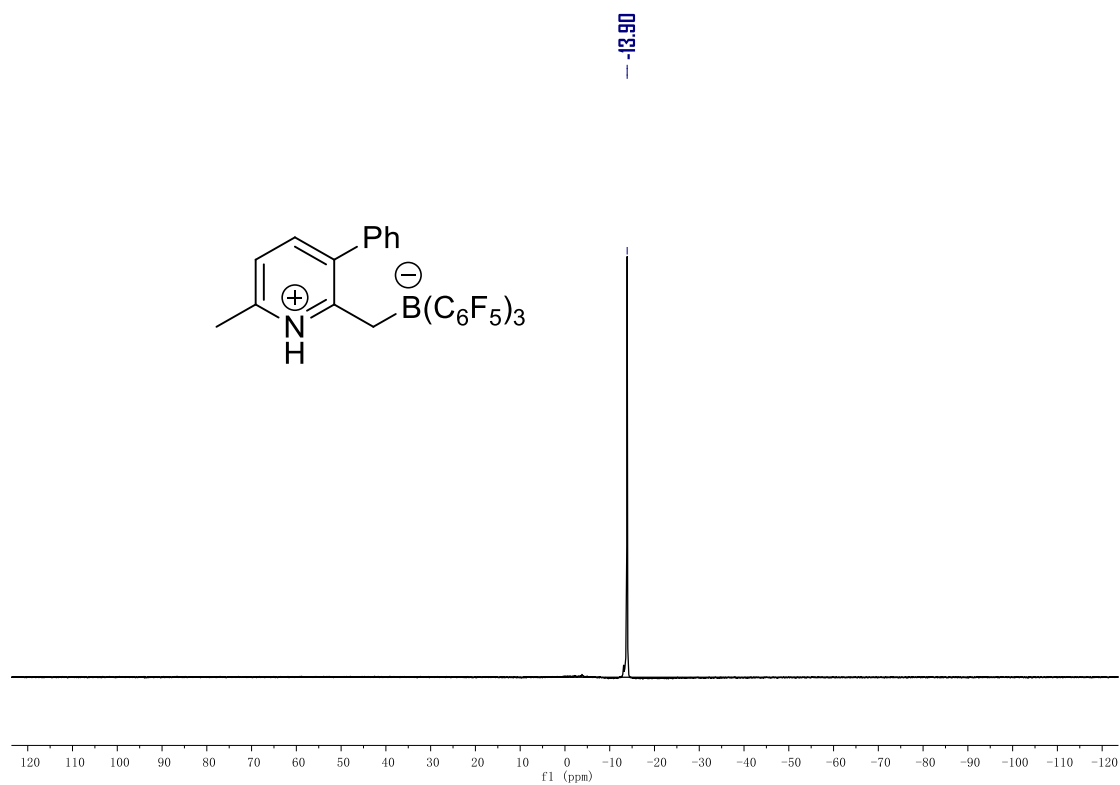

Figure S29: <sup>11</sup>B NMR spectrum of **1h** in CD<sub>2</sub>Cl<sub>2</sub>

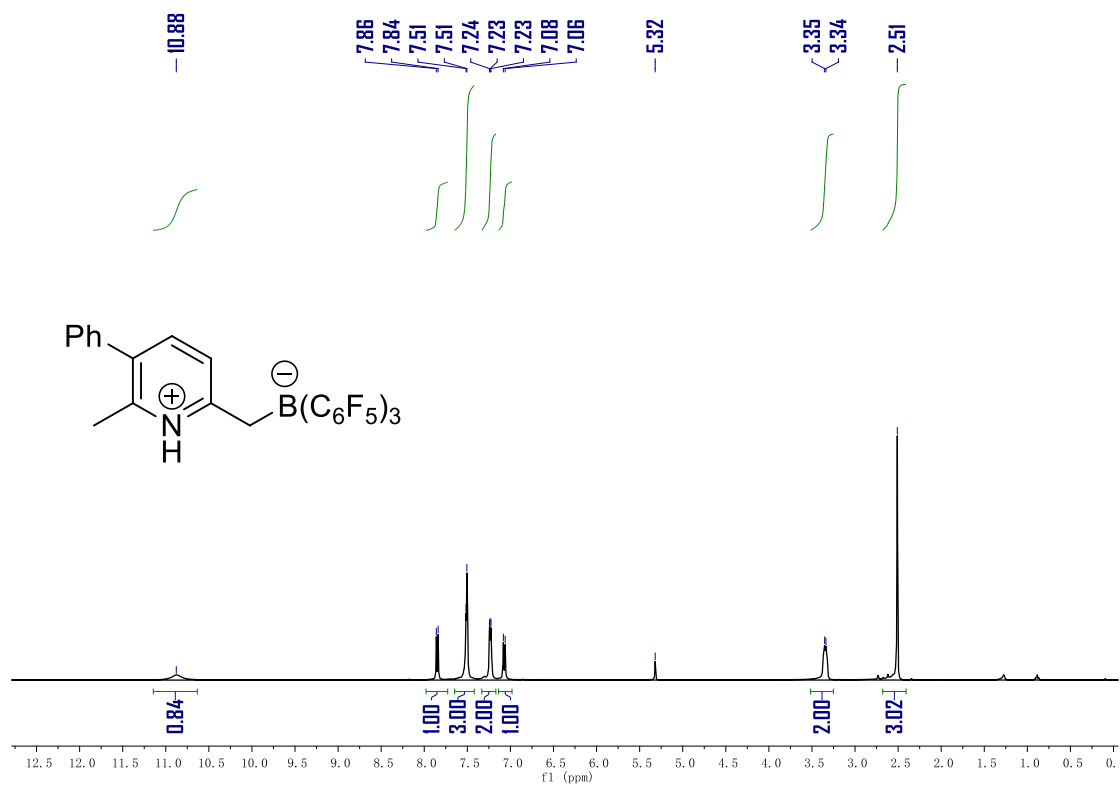

Figure S30: <sup>1</sup>H NMR spectrum of **1h'** in CD<sub>2</sub>Cl<sub>2</sub>

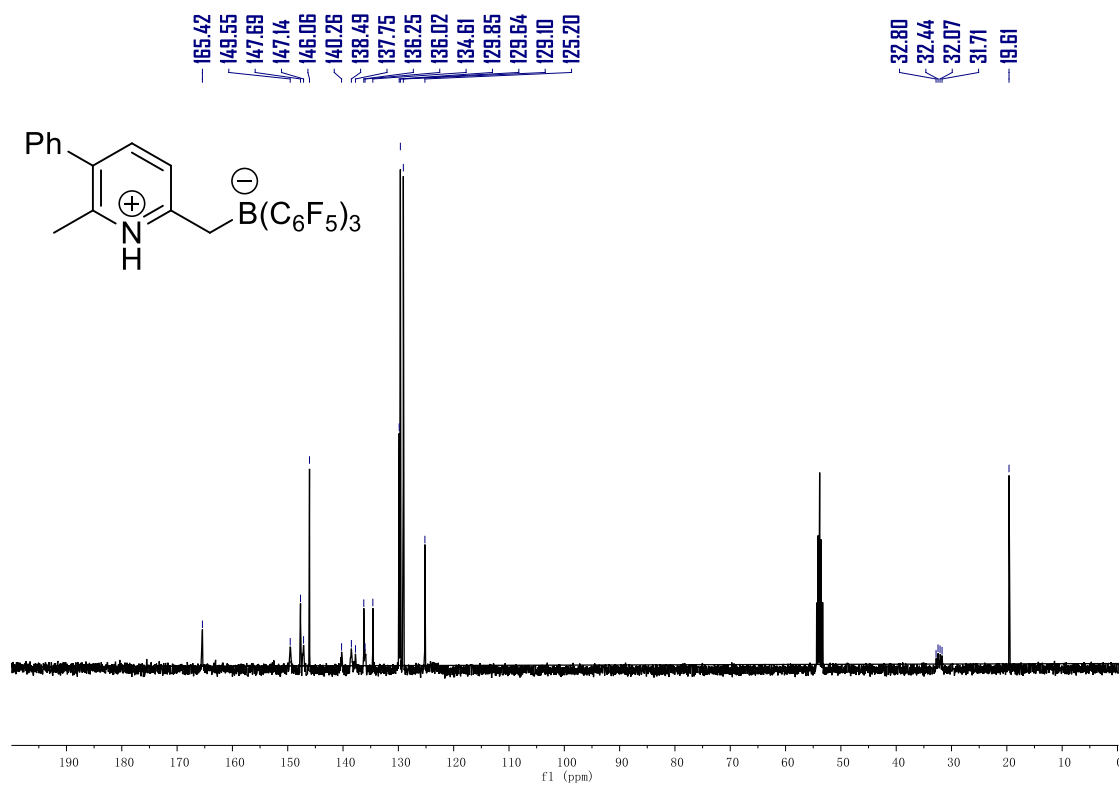

Figure S31: <sup>13</sup>C NMR spectrum of **1h'** in CD<sub>2</sub>Cl<sub>2</sub>

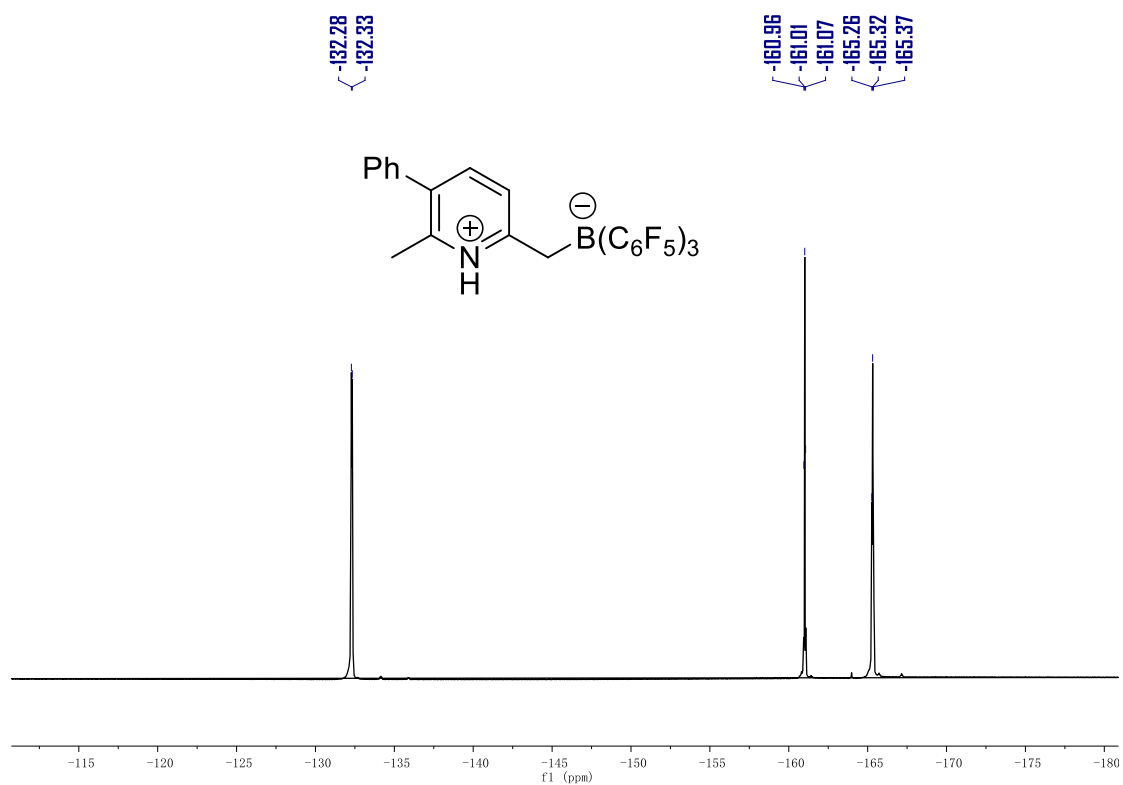

Figure S32: <sup>19</sup>F NMR spectrum of **1h'** in CD<sub>2</sub>Cl<sub>2</sub>

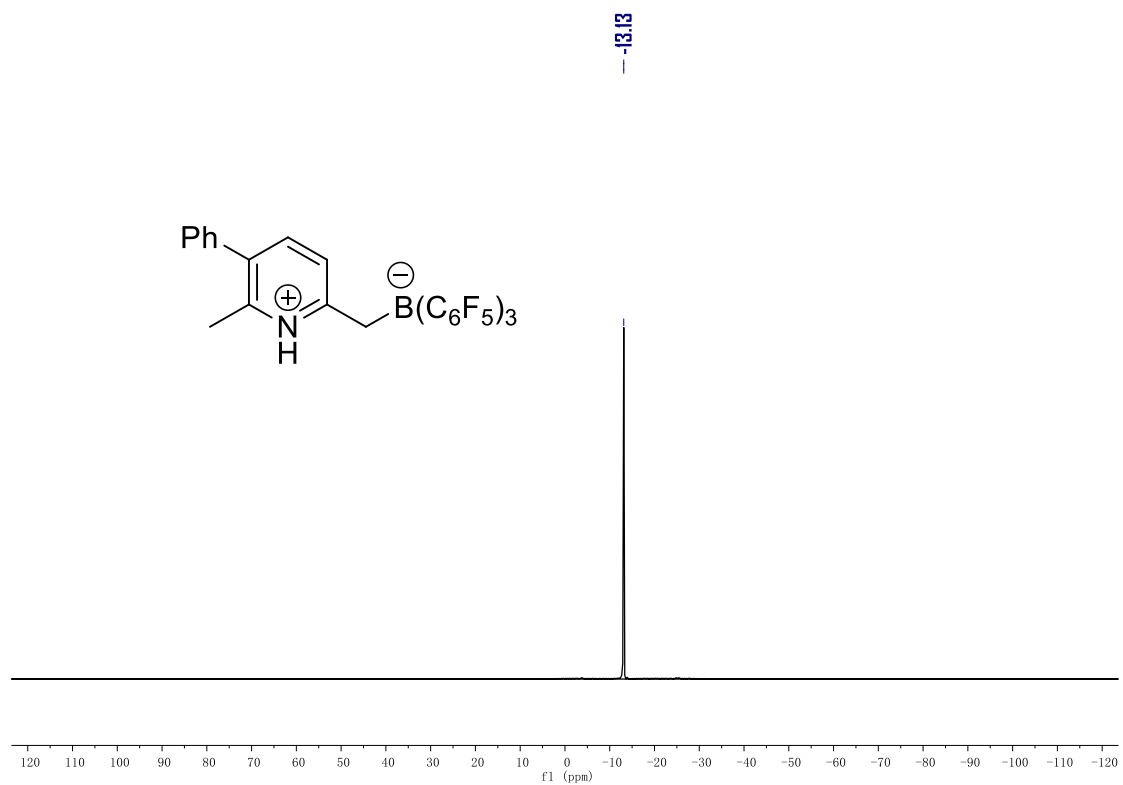

Figure S33: <sup>11</sup>B NMR spectrum of **1h'** in CD<sub>2</sub>Cl<sub>2</sub>



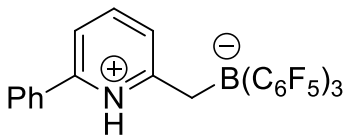

Chemical structure: c1ccccc1[n+]1ccccc1C[B-](c2ccccc2F)(c2ccccc2F)(c2ccccc2F)c2ccccc2F

<sup>13</sup>C NMR peaks (ppm):

| Peak (ppm) |
|------------|
| 167.33     |
| 150.53     |
| 149.50     |
| 147.16     |
| 145.60     |
| 140.30     |
| 140.16     |
| 138.55     |
| 137.83     |
| 136.15     |
| 133.37     |
| 130.94     |
| 126.69     |
| 125.79     |
| 119.96     |
| 33.14      |
| 32.80      |
| 32.40      |
| 32.06      |

Figure S35:  $^{13}\text{C}$  NMR spectrum of **1i** in  $\text{CD}_2\text{Cl}_2$



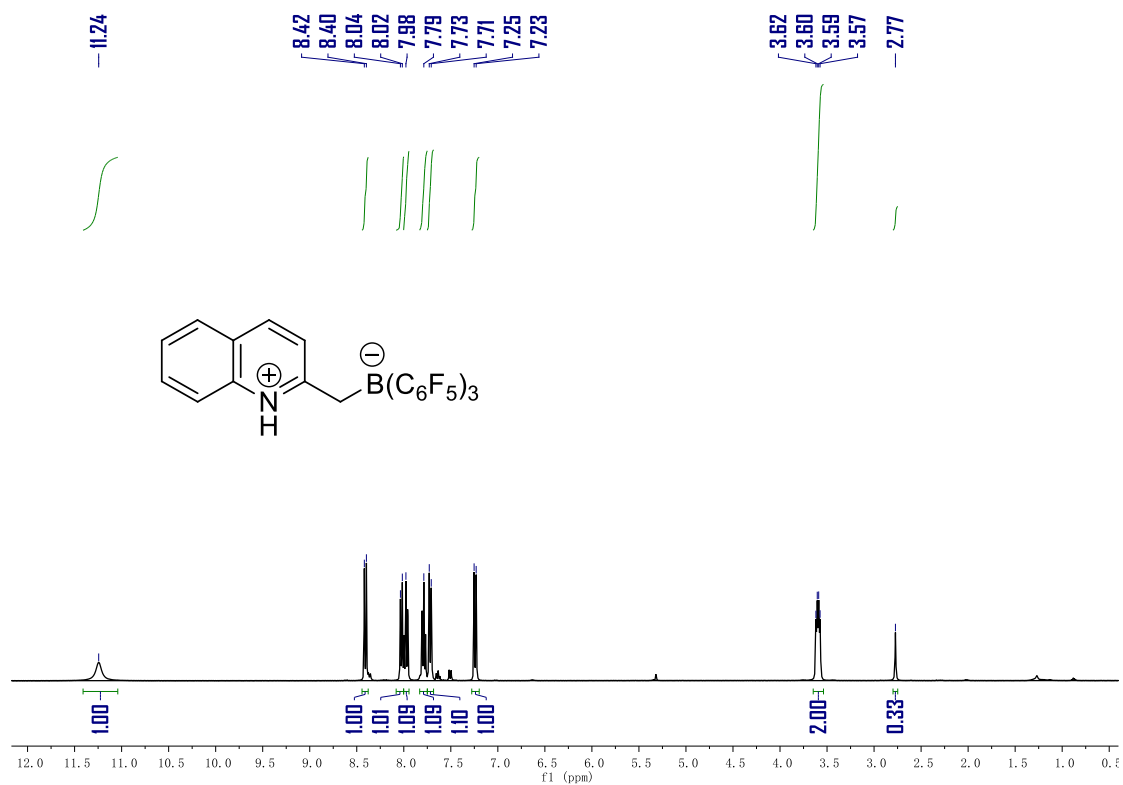

Figure S38: <sup>1</sup>H NMR spectrum of **1j** in CD<sub>2</sub>Cl<sub>2</sub>

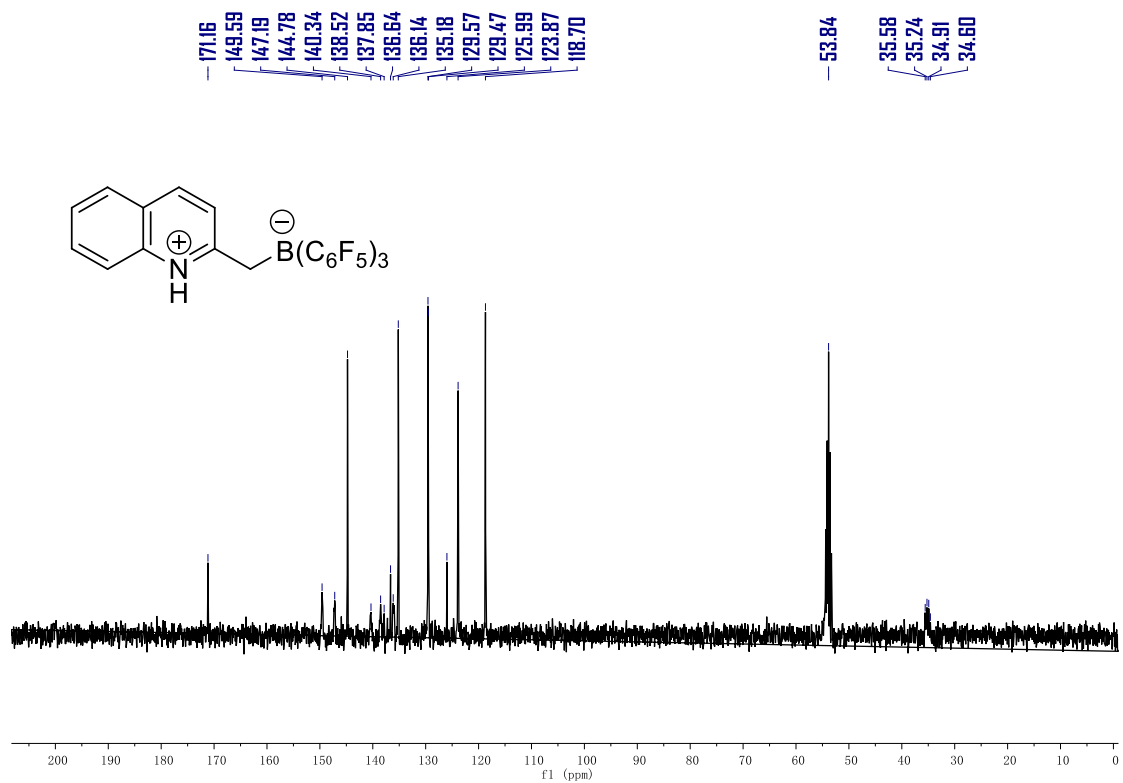

Figure S39: <sup>13</sup>C NMR spectrum of **1j** in CD<sub>2</sub>Cl<sub>2</sub>

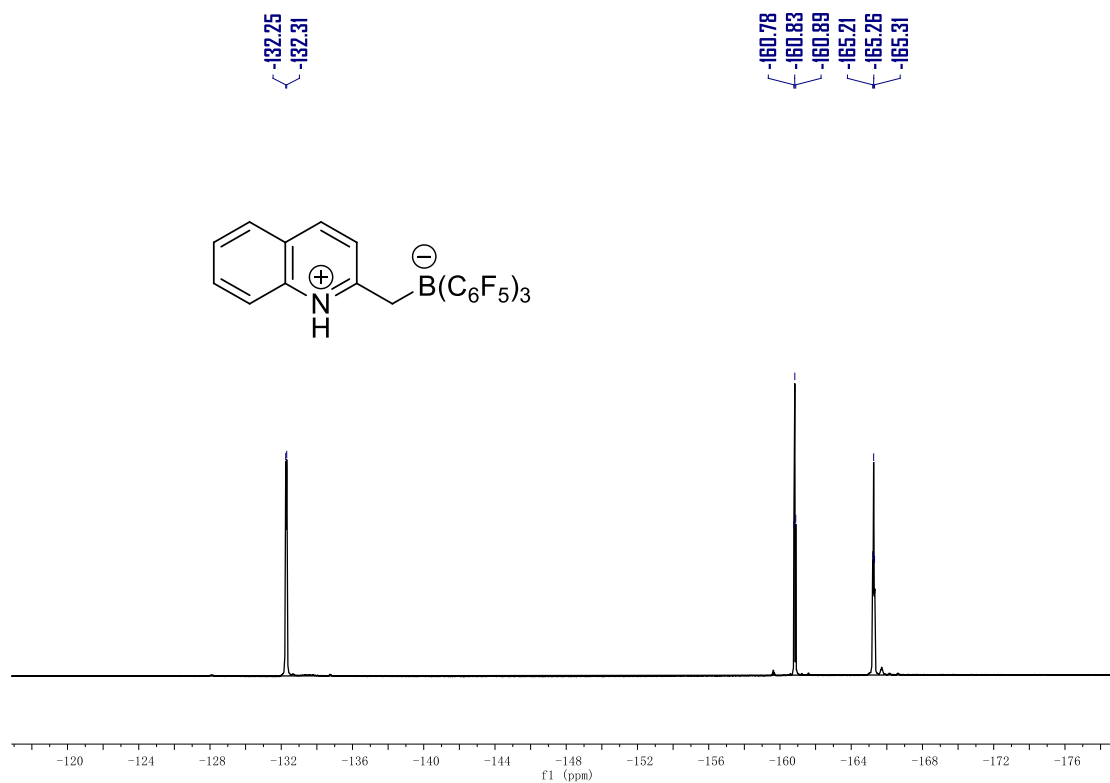

Figure S40: <sup>19</sup>F NMR spectrum of **1j** in CD<sub>2</sub>Cl<sub>2</sub>

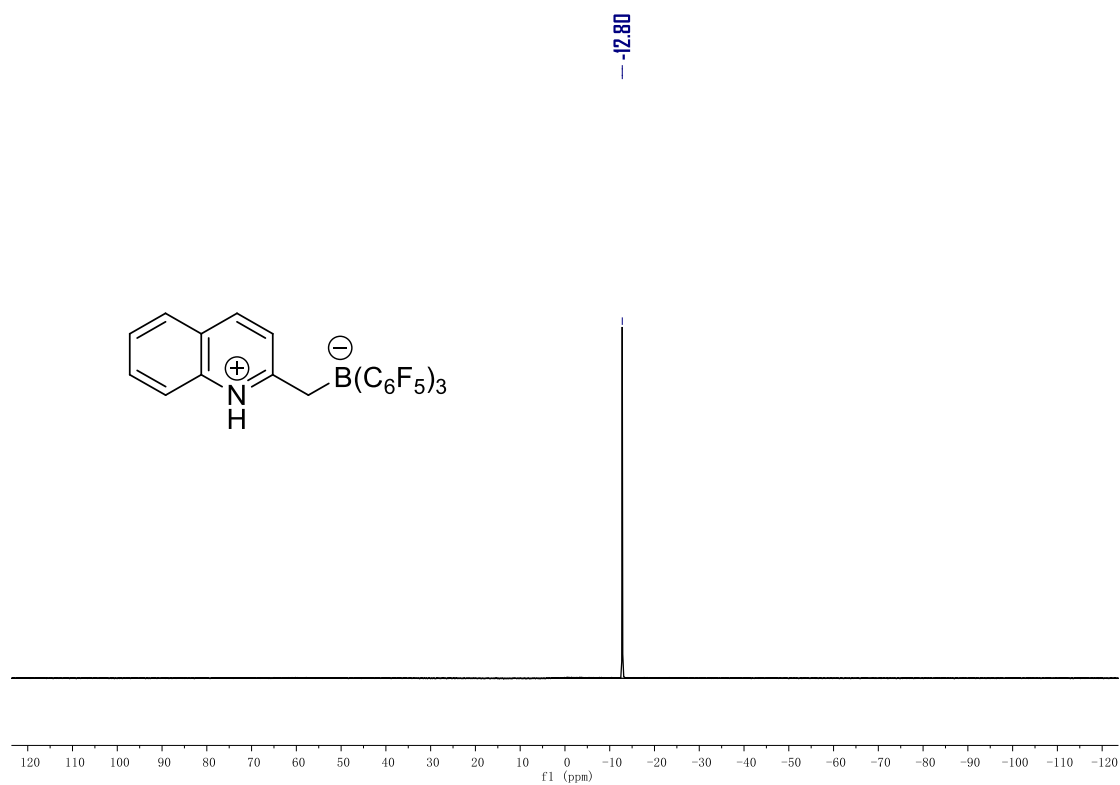

Figure S41: <sup>11</sup>B NMR spectrum of **1j** in CD<sub>2</sub>Cl<sub>2</sub>

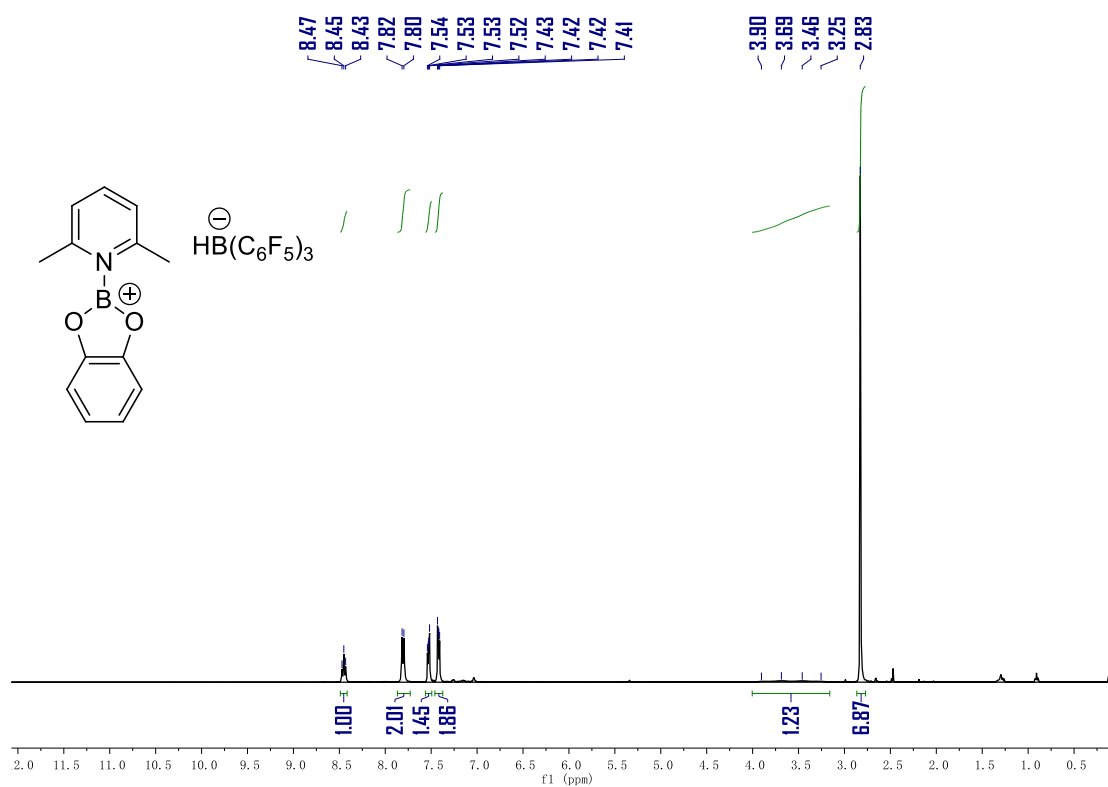

Figure S42: <sup>1</sup>H NMR spectrum of [[2,6-lutidine/Bcat]/HB(C<sub>6</sub>F<sub>5</sub>)<sub>3</sub>] in CD<sub>2</sub>Cl<sub>2</sub>

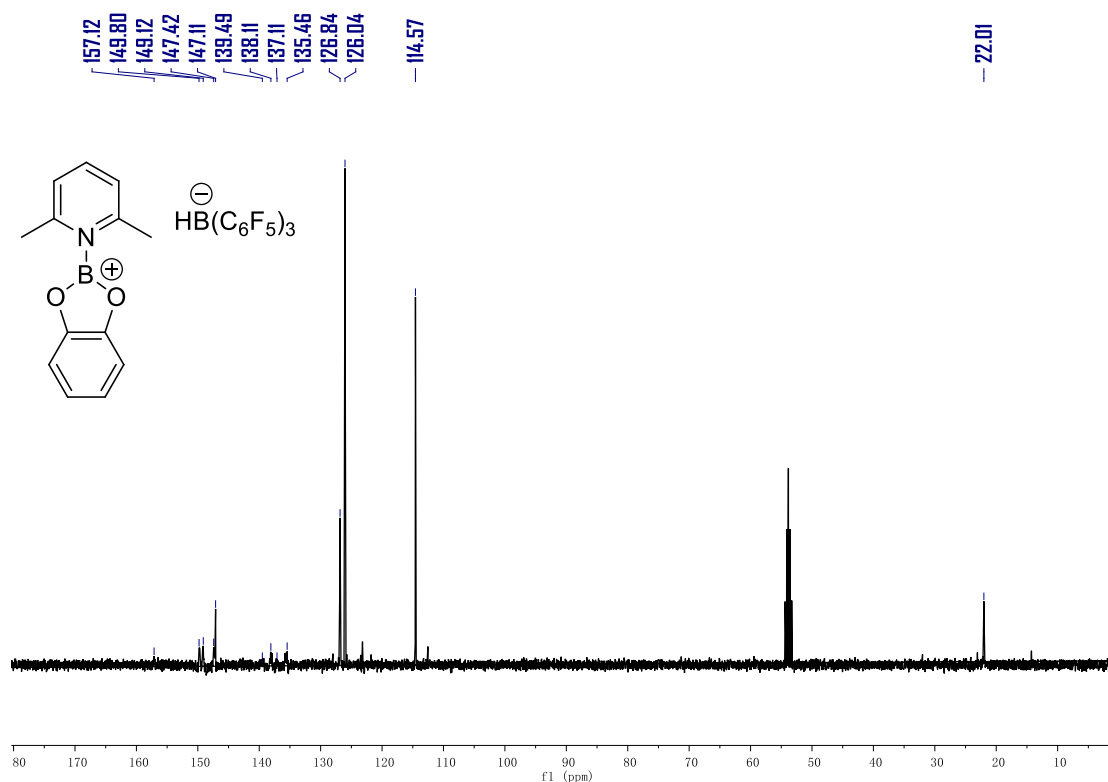

Figure S43: <sup>13</sup>C NMR spectrum of [[2,6-lutidine/Bcat]/HB(C<sub>6</sub>F<sub>5</sub>)<sub>3</sub>] in CD<sub>2</sub>Cl<sub>2</sub>

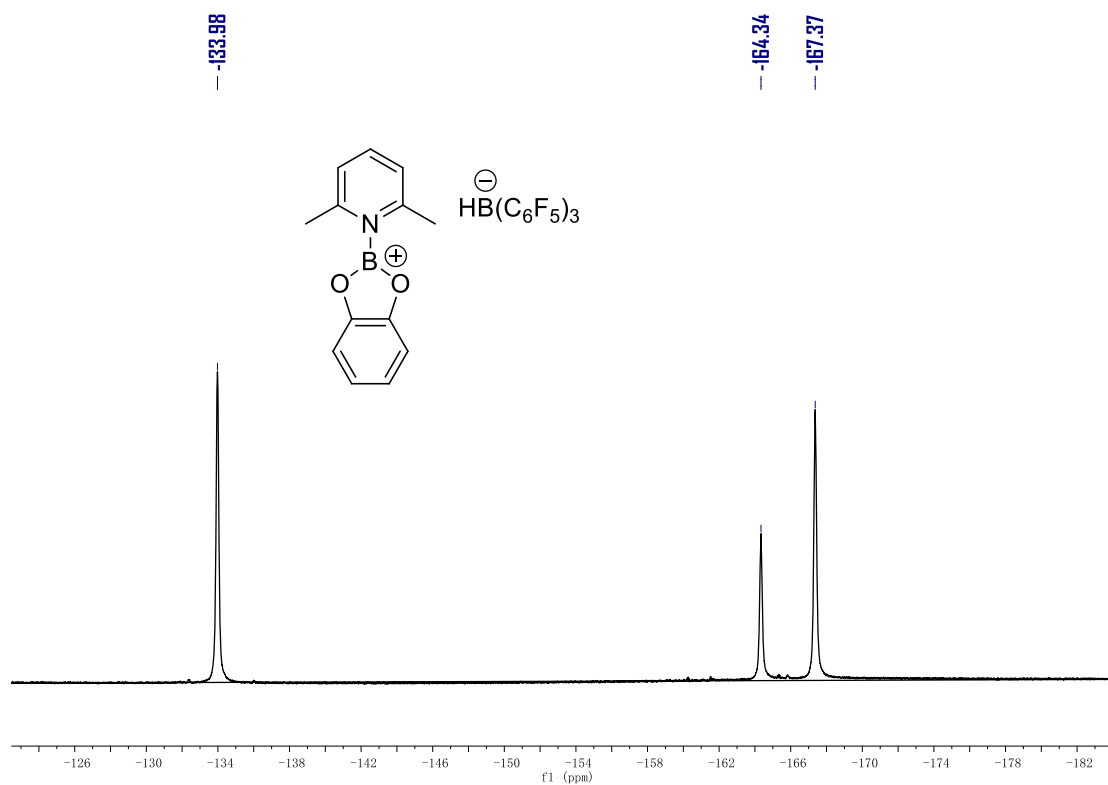

Figure S44: <sup>19</sup>F NMR spectrum of [[2,6-lutidine/Bcat]/HB(C<sub>6</sub>F<sub>5</sub>)<sub>3</sub>] in CD<sub>2</sub>Cl<sub>2</sub>

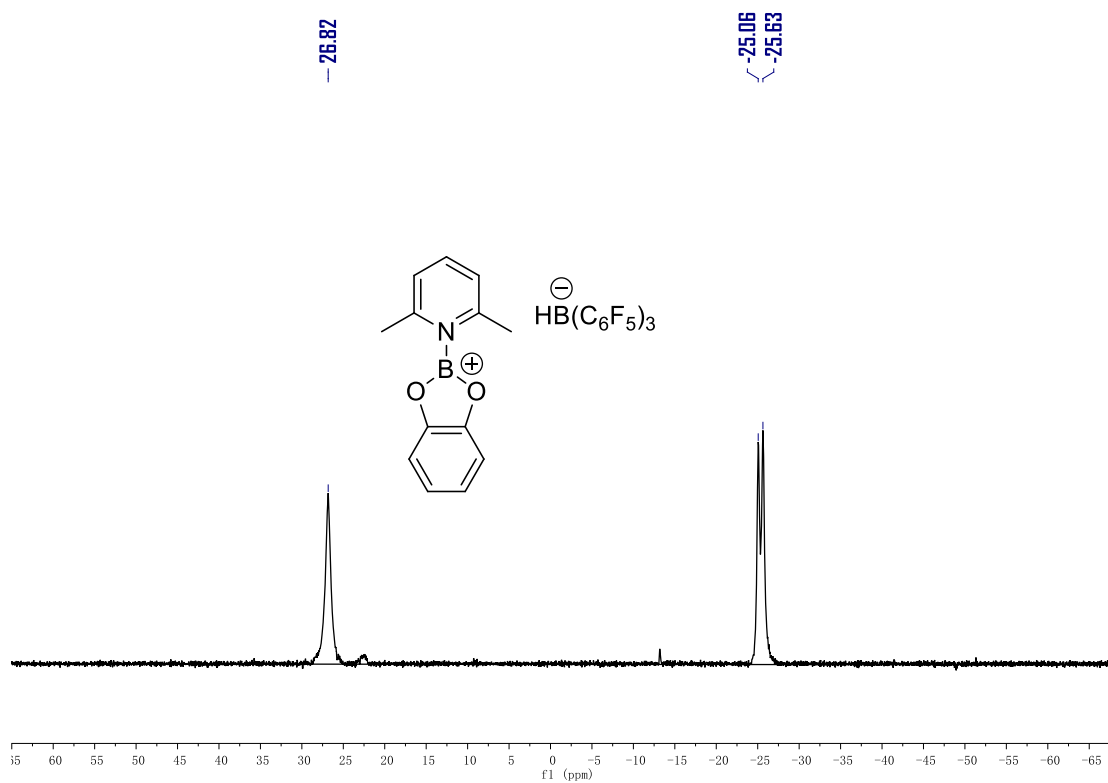

Figure S45: <sup>11</sup>B NMR spectrum of [[2,6-lutidine/Bcat]/HB(C<sub>6</sub>F<sub>5</sub>)<sub>3</sub>] in CD<sub>2</sub>Cl<sub>2</sub>

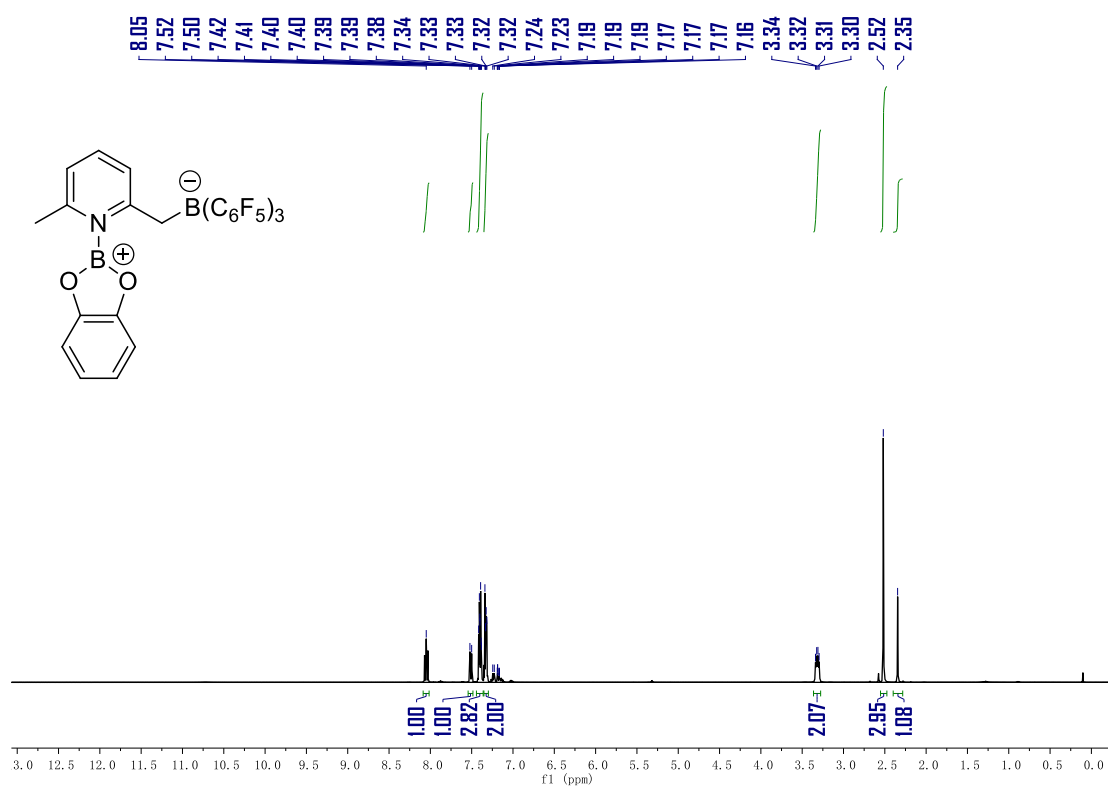

Figure S46: <sup>1</sup>H NMR spectrum of **2** in CD<sub>2</sub>Cl<sub>2</sub>

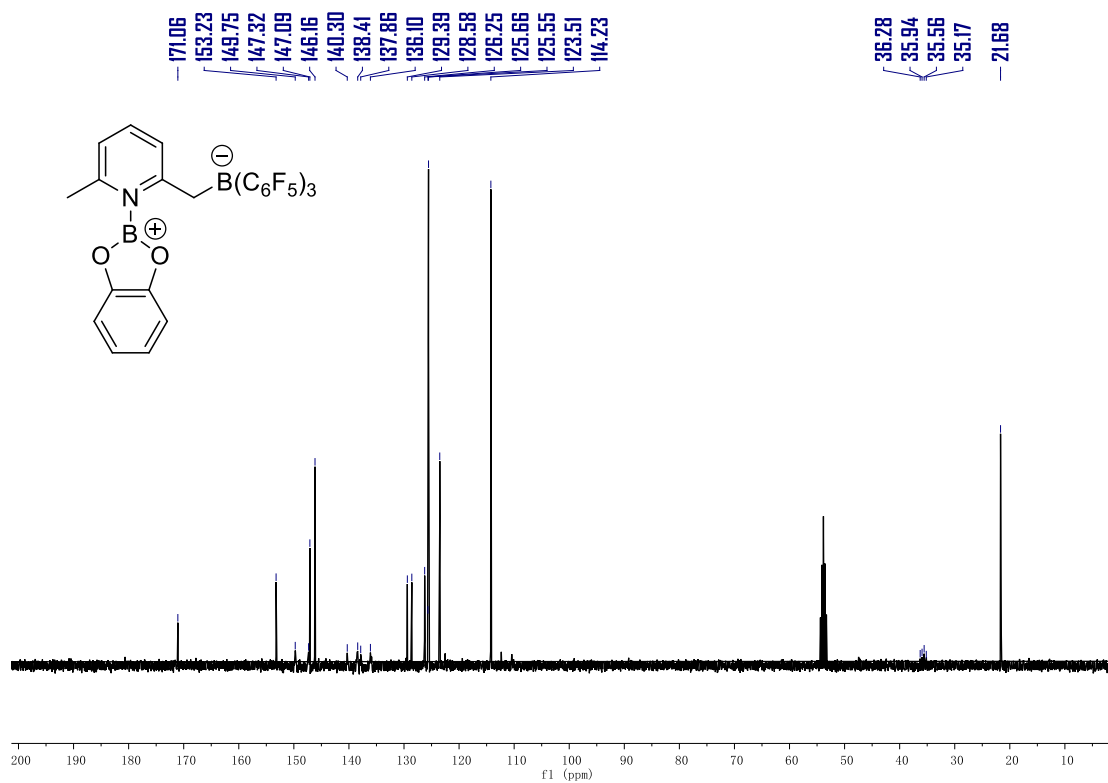

Figure S47: <sup>13</sup>C NMR spectrum of **2** in CD<sub>2</sub>Cl<sub>2</sub>

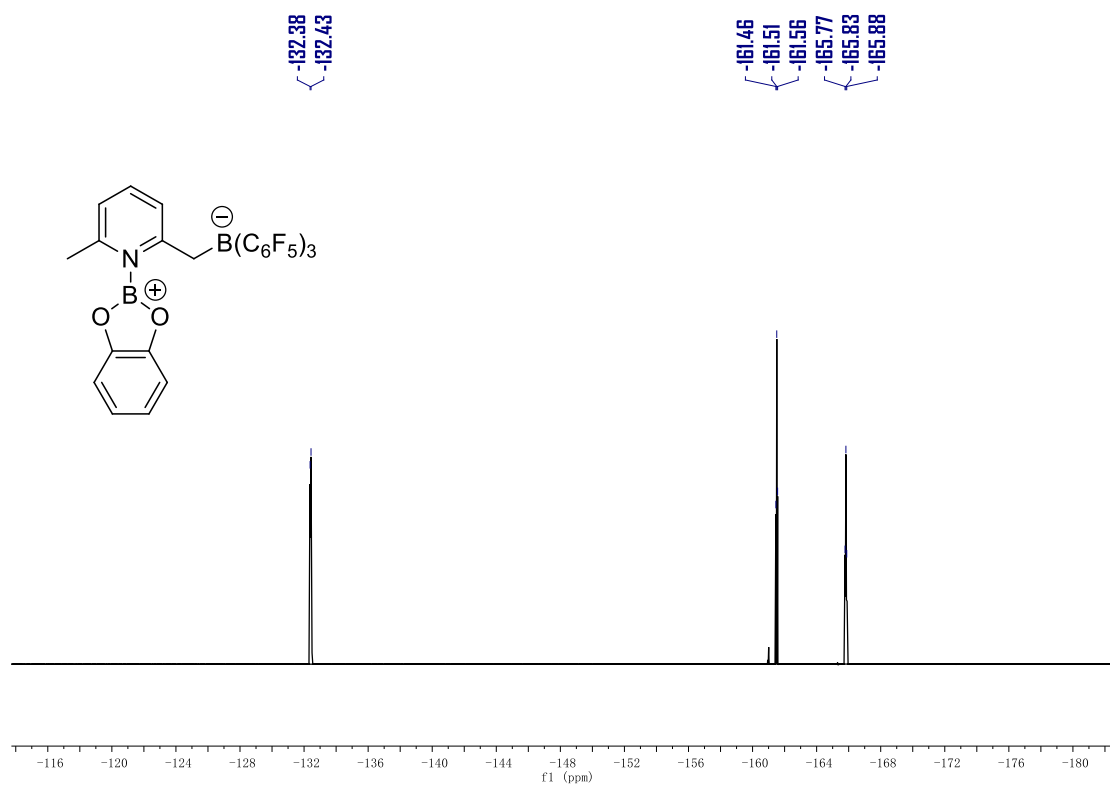

Figure S48: <sup>19</sup>F NMR spectrum of **2** in CD<sub>2</sub>Cl<sub>2</sub>

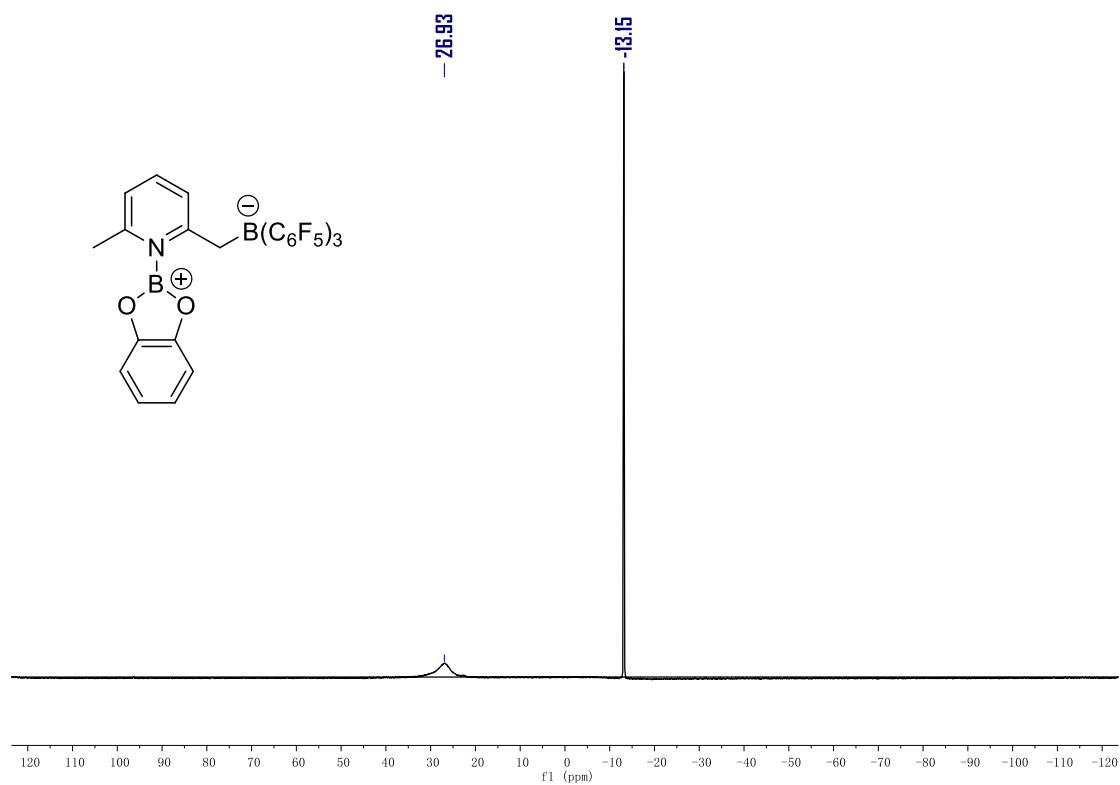

Figure S49: <sup>11</sup>B NMR spectrum of **2** in CD<sub>2</sub>Cl<sub>2</sub>



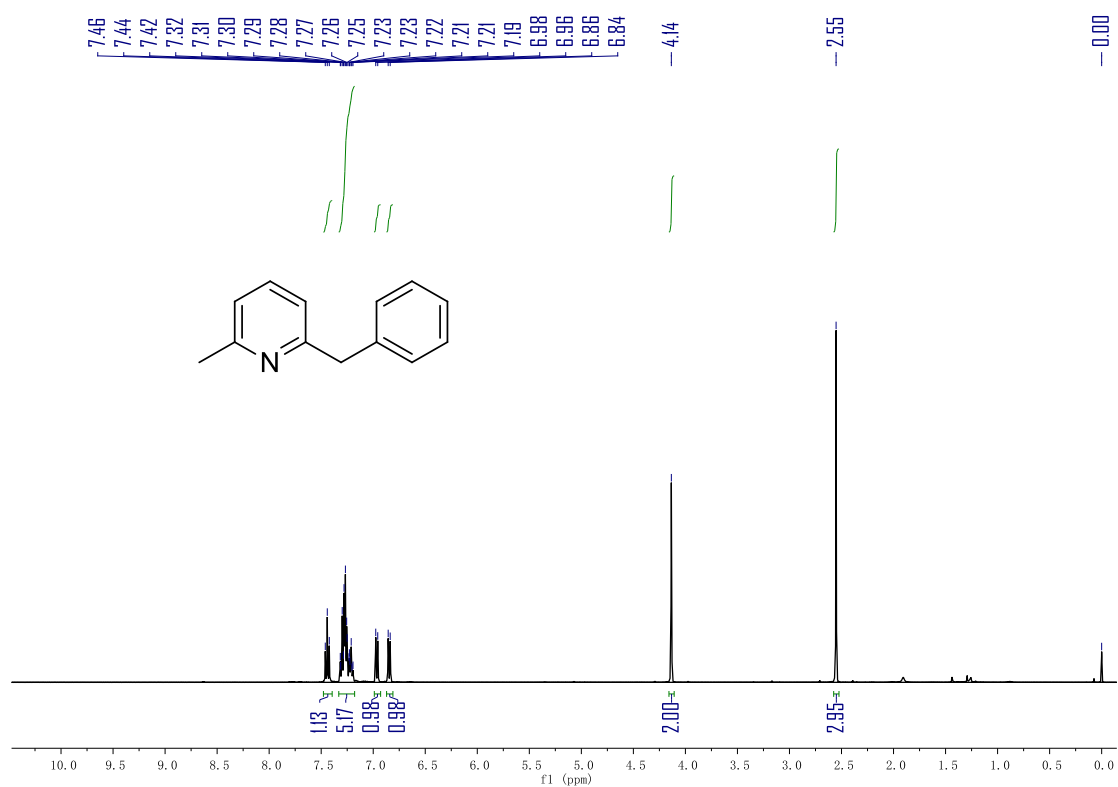

Figure S50: <sup>1</sup>H NMR spectrum of **4a** in CDCl<sub>3</sub>

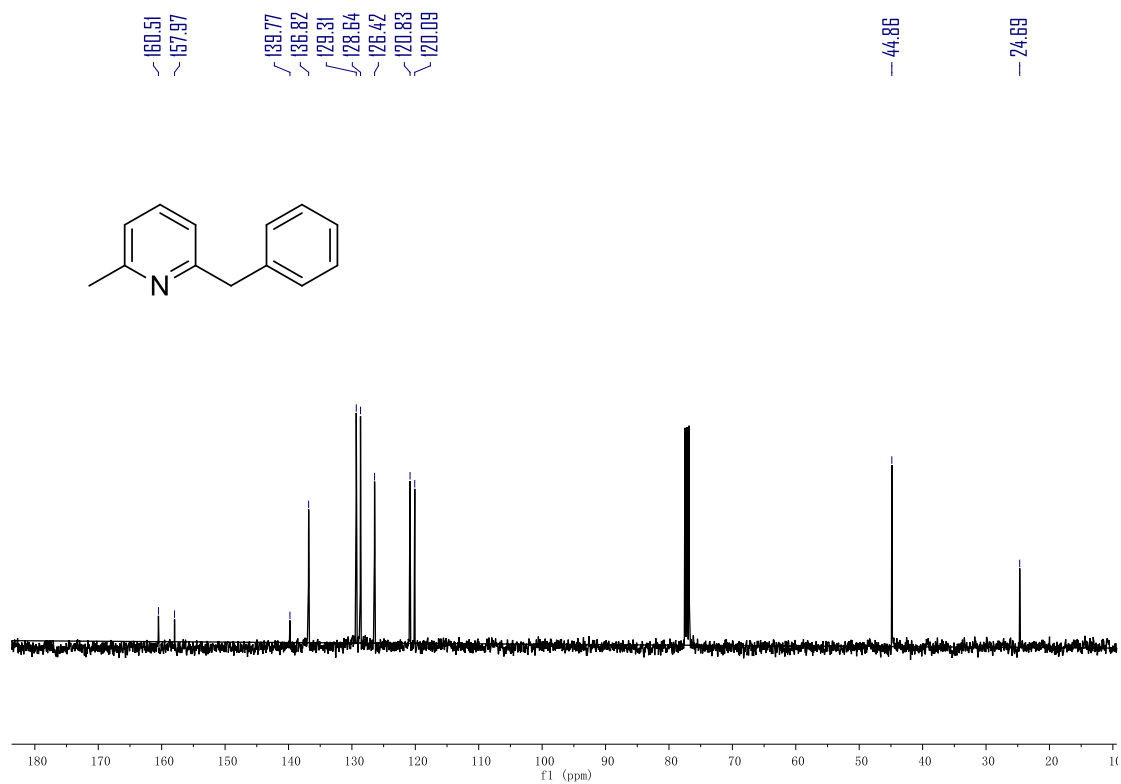

Figure S51: <sup>13</sup>C NMR spectrum of **4a** in CDCl<sub>3</sub>

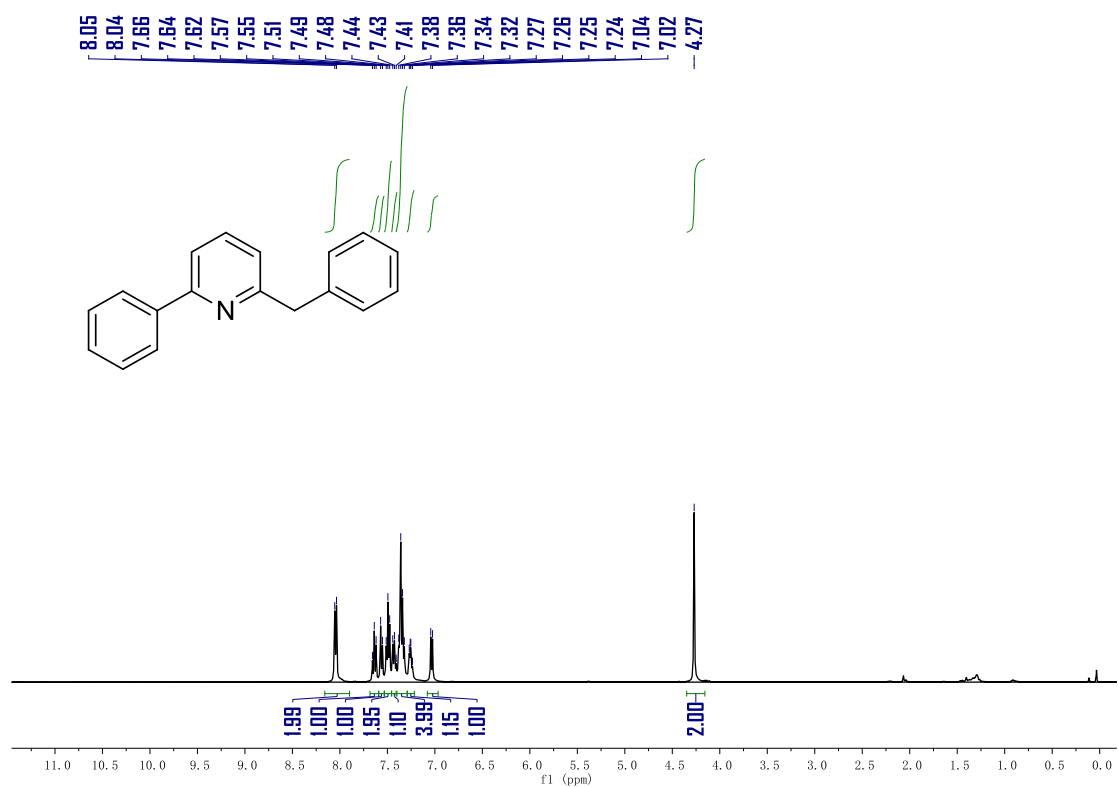

Figure S52: <sup>1</sup>H NMR spectrum of **4i** in CDCl<sub>3</sub>

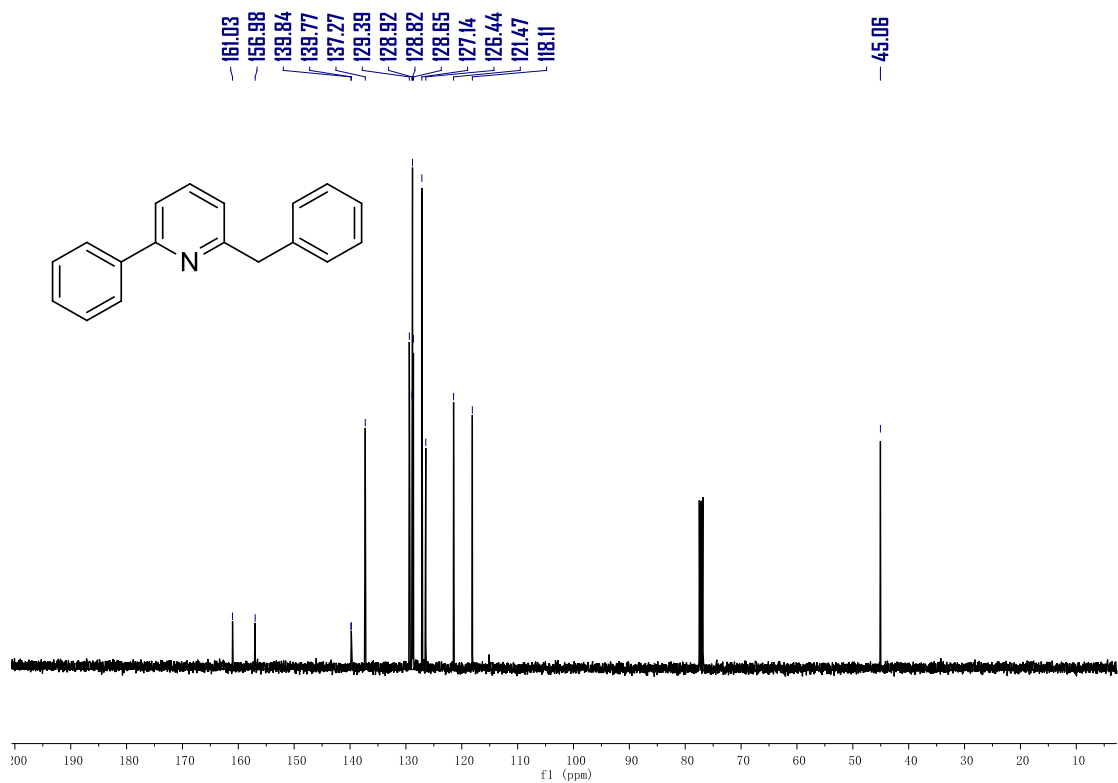

Figure S53: <sup>13</sup>C NMR spectrum of **4i** in CDCl<sub>3</sub>

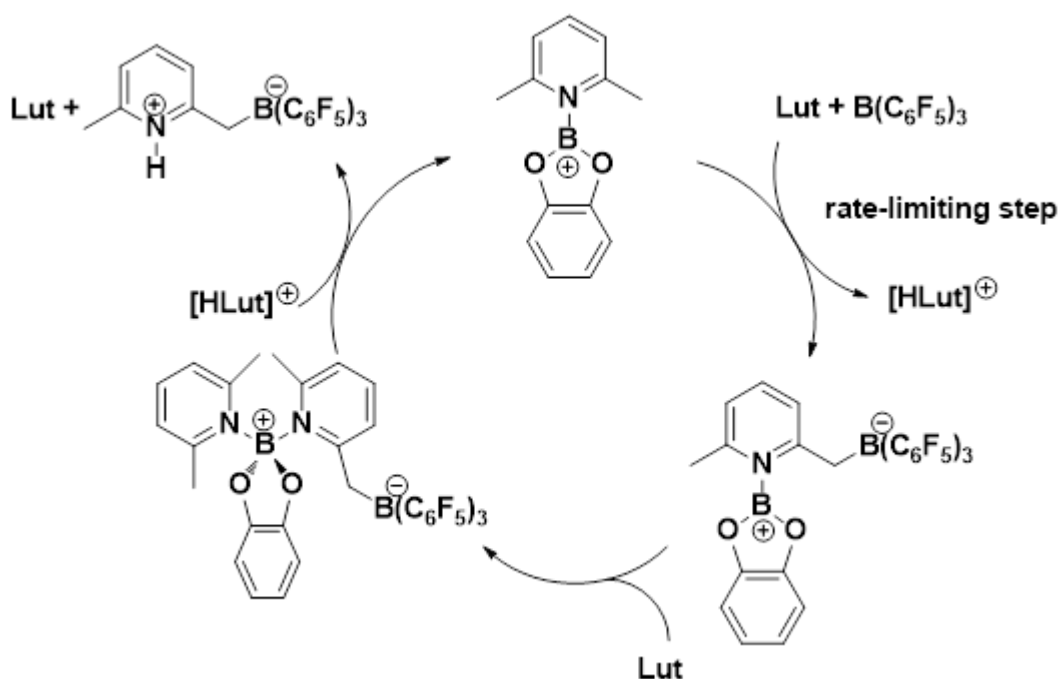

Figure S54: Proposed mechanism of formation of **1a**

### III. Computation details

Quantum chemical calculations were all performed at the density functional theory (DFT) level using the hybrid meta-GGA M06-2x functional,<sup>1</sup> which has been proven to give reliable results to the structural and energetic properties of non-covalent systems and reaction energy barriers.<sup>2</sup> The M06-2x functional has a mean absolute error in energy barriers of about 1.3 kcal/mol. To reduce computational costs, a combined basis set was used: The 6-31+G(d,p) basis set<sup>3</sup> was employed for the atoms involved directly in the reaction which are O, B, the H atoms bonded to B, the C and H atoms of 2,6-lutidine; The 6-31G(d) basis set was used for the rest atoms. Single-point energy calculations were then performed with the full 6-31+G(d,p) basis set for all the atoms and the empirical long-range correction of Grimme et al.<sup>4</sup> All the DFT calculations were performed with a pruned (99,590) integration grid.

Full geometry optimization were carried out in the dichloromethane solution which

was modeled by the polarizable continuum solvation model (IEFPCM)<sup>5</sup> with radii and non-electrostatic terms for Truhlar and coworkers' SMD solvation model.<sup>6</sup> This solvation model is by far the most reliable one in predicting solvation free energies. The convergence criteria used for the geometry optimization are  $4.50 \times 10^{-4}$  au. for gradients, and  $1.80 \times 10^{-3}$  au. for displacements. Harmonic vibrational analyses were carried out to confirm if the optimized structure is a local minima or a first order transition state and to provide zero-point vibrational energy corrections and thermal corrections to various thermodynamic properties. Transition states were further confirmed by IRC calculations.<sup>7</sup> All the calculations were performed by using the Gaussian 09 program.<sup>8</sup>

#### References:

1. (a) Zhao, Y.; Truhlar, D. G. *J. Chem. Phys.* 2006, *125*, 194101; (b) Zhao, Y.; Truhlar, D. G. *J. Phys. Chem. A* 2006, *110*, 5121.
2. Zhao, Y.; Truhlar, D. G. *Theo. Chem. Acc.* 2008, *120*, 215.
3. (a) McLean, A. D.; Chandler, G. S. *J. Chem. Phys.* 1980, *72*, 5639-5648. (b) Krishnan, R.; Binkley, J. S.; Seeger, R.; Pople, J. A. *J. Chem. Phys.* 1980, *72*, 650-654.
4. Grimme, S.; Antony, J.; Ehrlich S.; Krieg, H. *J. Chem. Phys.*, 2010, *132*, 154104.
5. Scalmani, G.; Frisch, M. J.; Map, V. *J. Chem. Phys.* 2010, *132*, 114110.
6. Marenich, A. V.; Cramer, C. J.; Truhlar, D. G. *J. Phys. Chem. B* 2009, *113*, 6378.
7. Hratchian, H. P.; Schlegel, H. B. *J. Chem. Phys.* 2004, *120*, 9918-24. (b) Hratchian, H. P.; Schlegel, H. B. *J. Chem. Theory and Comput.* 2005, *1*, 61-69.
8. Gaussian 09, Revision A.02, M. J. Frisch, G. W. Trucks, H. B. Schlegel, G. E. Scuseria, M. A. Robb, J. R. Cheeseman, G. Scalmani, V. Barone, B. Mennucci, G. A. Petersson, H. Nakatsuji, M. Caricato, X. Li, H. P. Hratchian, A. F. Izmaylov, J. Bloino, G. Zheng, J. L. Sonnenberg, M. Hada, M. Ehara, K. Toyota, R. Fukuda, J. Hasegawa, M. Ishida, T. Nakajima, Y. Honda, O. Kitao, H. Nakai, T. Vreven, J. A. Montgomery, Jr., J. E. Peralta, F. Ogliaro, M. Bearpark, J. J. Heyd, E. Brothers, K. N. Kudin, V. N. Staroverov, R. Kobayashi, J. Normand, K. Raghavachari, A. Rendell, J. C. Burant, S. S. Iyengar, J. Tomasi, M. Cossi, N.

Rega, J. M. Millam, M. Klene, J. E. Knox, J. B. Cross, V. Bakken, C. Adamo, J. Jaramillo, R. Gomperts, R. E. Stratmann, O. Yazyev, A. J. Austin, R. Cammi, C. Pomelli, J. W. Ochterski, R. L. Martin, K. Morokuma, V. G. Zakrzewski, G. A. Voth, P. Salvador, J. J. Dannenberg, S. Dapprich, A. D. Daniels, O. Farkas, J. B. Foresman, J. V. Ortiz, J. Cioslowski, and D. J. Fox, Gaussian, Inc., Wallingford CT, 2009.

## Geometries and Cartesian coordinates of the important intermediates and transition states involved in the reaction

1a:

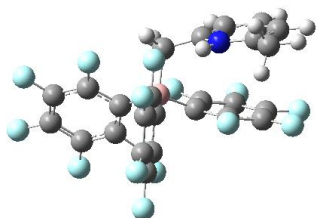

Charge = 0 Multiplicity = 1

C,0,-1.4324561999,-1.3761659964,0.2739640309  
C,0,1.1291609109,-1.0224121951,0.1173541505  
C,0,-0.4697306326,1.1052509912,-0.4783464239  
C,0,-1.5540807816,-2.3866717428,1.2209728573  
C,0,-2.291218897,-1.5093957456,-0.8118678304  
C,0,2.173249077,-1.3463691454,0.9688217357  
C,0,1.2893691671,-1.5243835687,-1.1730032144  
C,0,-1.696729742,1.7581693872,-0.5358543556  
C,0,0.5968329344,1.8728361312,-0.9312145127  
C,0,-2.4659270894,-3.4279078523,1.1444022309  
C,0,-3.2197698597,-2.534290895,-0.9356925108  
C,0,3.2877606912,-2.0900779668,0.6011502057  
C,0,2.3747594097,-2.2721435496,-1.5948145181  
C,0,-1.8692016208,3.0558184131,-0.988827236  
C,0,0.4796384477,3.1836176531,-1.3743848934  
C,0,-3.312040826,-3.5009949049,0.050990996  
C,0,3.388829182,-2.5623780792,-0.6938700982  
C,0,-0.7653485853,3.7844774083,-1.4015757313  
F,0,-0.7307554889,-2.3993621404,2.2971442486  
F,0,-2.2669012129,-0.6256078186,-1.828685025  
F,0,2.1870093089,-0.9028155111,2.2596149979  
F,0,0.3445914352,-1.2616940549,-2.1010245695  
F,0,-2.7952465066,1.1672852273,-0.012969234  
F,0,1.8677135467,1.40211017,-0.8620842711  
F,0,-2.5278835411,-4.3596051753,2.1052341338  
F,0,-4.0258952839,-2.5974447987,-2.0040566821  
F,0,4.2595213958,-2.3447763227,1.4861349225  
F,0,2.4575332578,-2.7158842203,-2.8548181367  
F,0,-3.0713987801,3.6455347205,-0.9347593829  
F,0,1.5712357862,3.8922137112,-1.6990504608  
F,0,-4.2019697542,-4.4932169354,-0.0527834782

F,0,4.4493691301,-3.2797492835,-1.0752029156  
 F,0,-0.8928934287,5.0677437041,-1.7557110089  
 C,0,0.1939829883,1.7574439619,2.1155510352  
 C,0,-0.5686227342,2.927798894,2.1006425907  
 C,0,0.0556724106,4.1557383578,1.9391802025  
 C,0,1.4480151853,4.2372663772,1.8270854455  
 C,0,2.1981424815,3.0793061234,1.9037805622  
 N,0,1.5366201562,1.9044723592,2.0485547384  
 H,0,-0.5413447593,5.0618905421,1.8891175295  
 H,0,-1.6475934544,2.849042738,2.1778361683  
 H,0,1.9505162535,5.1869937197,1.6866321143  
 C,0,-0.3767818158,0.3894591984,2.0384003155  
 H,0,0.1001411176,-0.2716273969,2.7616327625  
 H,0,-1.4365855944,0.4608435492,2.3003437024  
 C,0,3.6880020698,3.0110888874,1.8310683713  
 H,0,3.9965584277,2.3975450589,0.9782037114  
 H,0,4.1041293885,4.0116004946,1.7139391191  
 H,0,4.0945127893,2.561070981,2.7419455596  
 H,0,2.099445901,1.0547564828,2.099599349  
 B,0,-0.2745012611,-0.2276119432,0.467937702

B(C<sub>6</sub>F<sub>5</sub>)<sub>3</sub>:

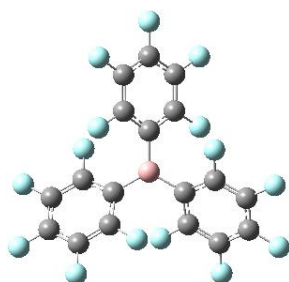

Charge = 0 Multiplicity = 1

|   |   |           |           |           |
|---|---|-----------|-----------|-----------|
| 5 | 0 | 0.000000  | 0.000000  | 0.001103  |
| 6 | 0 | 0.000296  | 1.568753  | 0.000918  |
| 6 | 0 | -1.358727 | -0.784120 | 0.000918  |
| 6 | 0 | 1.358432  | -0.784632 | 0.000918  |
| 6 | 0 | 0.982625  | 2.312949  | -0.653646 |
| 6 | 0 | 0.994445  | 3.697118  | -0.672743 |
| 6 | 0 | 0.000000  | 4.391442  | -0.000535 |
| 6 | 0 | -0.994439 | 3.697551  | 0.672273  |
| 6 | 0 | -0.982372 | 2.313427  | 0.654601  |
| 6 | 0 | -2.494385 | -0.305496 | -0.653646 |
| 6 | 0 | -3.699021 | -0.987344 | -0.672743 |
| 6 | 0 | -3.803100 | -2.195721 | -0.000535 |
| 6 | 0 | -2.704954 | -2.709985 | 0.672273  |
| 6 | 0 | -1.512301 | -2.007473 | 0.654601  |

|   |   |           |           |           |
|---|---|-----------|-----------|-----------|
| 6 | 0 | 1.511760  | -2.007453 | -0.653646 |
| 6 | 0 | 2.704576  | -2.709774 | -0.672743 |
| 6 | 0 | 3.803100  | -2.195721 | -0.000535 |
| 6 | 0 | 3.699393  | -0.987567 | 0.672273  |
| 6 | 0 | 2.494673  | -0.305955 | 0.654601  |
| 9 | 0 | 1.967910  | 1.693199  | -1.319681 |
| 9 | 0 | 1.948763  | 4.365429  | -1.324349 |
| 9 | 0 | -0.000164 | 5.720831  | -0.001116 |
| 9 | 0 | -1.948755 | 4.366456  | 1.323271  |
| 9 | 0 | -1.967579 | 1.694074  | 1.321092  |
| 9 | 0 | -2.450309 | 0.857661  | -1.319681 |
| 9 | 0 | -4.754954 | -0.495037 | -1.324349 |
| 9 | 0 | -4.954303 | -2.860558 | -0.001116 |
| 9 | 0 | -2.807084 | -3.870899 | 1.323271  |
| 9 | 0 | -0.483321 | -2.551011 | 1.321092  |
| 9 | 0 | 0.482398  | -2.550860 | -1.319681 |
| 9 | 0 | 2.806191  | -3.870392 | -1.324349 |
| 9 | 0 | 4.954467  | -2.860273 | -0.001116 |
| 9 | 0 | 4.755839  | -0.495557 | 1.323271  |
| 9 | 0 | 2.450901  | 0.856937  | 1.321092  |

[HB(C<sub>6</sub>F<sub>5</sub>)<sub>3</sub>]<sup>-</sup>:

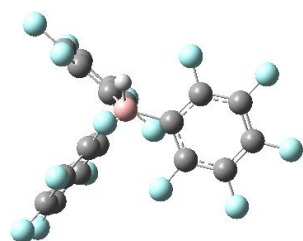

Charge = -1 Multiplicity = 1

|                 |                |                 |
|-----------------|----------------|-----------------|
| H               |                | 0.019406000000  |
| -0.009625000000 | 2.078702000000 |                 |
| B               |                | 0.029625000000  |
| -0.005359000000 | 0.871573000000 |                 |
| C               |                | -0.932135000000 |
| -1.236731000000 | 0.388261000000 |                 |
| C               |                | -0.583972000000 |
| 1.437467000000  | 0.406891000000 |                 |
| C               |                | 1.586629000000  |
| -0.208983000000 | 0.415722000000 |                 |
| C               |                | -1.125051000000 |
| -2.348940000000 | 1.197638000000 |                 |
| C               |                | -1.957233000000 |
| -3.410386000000 | 0.866407000000 |                 |
| C               |                | -2.641168000000 |



|                 |                 |                 |
|-----------------|-----------------|-----------------|
| -3.384380000000 | -0.336473000000 |                 |
| C               |                 | -2.475201000000 |
| -2.303185000000 | -1.186879000000 |                 |
| C               |                 | -1.631727000000 |
| -1.267978000000 | -0.811847000000 |                 |
| C               |                 | -1.605154000000 |
| 2.021074000000  | 1.146822000000  |                 |
| C               |                 | -2.182778000000 |
| 3.245164000000  | 0.839923000000  |                 |
| C               |                 | -1.733911000000 |
| 3.944526000000  | -0.267410000000 |                 |
| C               |                 | -0.725856000000 |
| 3.402326000000  | -1.046876000000 |                 |
| C               |                 | -0.183709000000 |
| 2.172412000000  | -0.701027000000 |                 |
| C               |                 | 2.617527000000  |
| 0.270598000000  | 1.214740000000  |                 |
| C               |                 | 3.964907000000  |
| 0.113543000000  | 0.918148000000  |                 |
| C               |                 | 4.329385000000  |
| -0.554372000000 | -0.238161000000 |                 |
| C               |                 | 3.341194000000  |
| -1.041505000000 | -1.077523000000 |                 |
| C               |                 | 2.008719000000  |
| -0.855512000000 | -0.739229000000 |                 |
| F               |                 | -0.480827000000 |
| -2.450005000000 | 2.379049000000  |                 |
| F               |                 | -2.105595000000 |
| -4.456177000000 | 1.694065000000  |                 |
| F               |                 | -3.450850000000 |
| -4.395210000000 | -0.677582000000 |                 |
| F               |                 | -3.126316000000 |
| -2.275364000000 | -2.359906000000 |                 |
| F               |                 | -1.498903000000 |
| -0.260720000000 | -1.699432000000 |                 |
| F               |                 | -2.101101000000 |
| 1.384303000000  | 2.228890000000  |                 |
| F               |                 | -3.165151000000 |
| 3.756752000000  | 1.597268000000  |                 |
| F               |                 | -2.272797000000 |
| 5.128802000000  | -0.585291000000 |                 |
| F               |                 | -0.294675000000 |
| 4.066946000000  | -2.129906000000 |                 |
| F               |                 | 0.767744000000  |

|                 |                 |                |
|-----------------|-----------------|----------------|
| 1.693709000000  | -1.529232000000 |                |
| F               |                 | 2.337193000000 |
| 0.944676000000  | 2.350153000000  |                |
| F               |                 | 4.913615000000 |
| 0.596936000000  | 1.734740000000  |                |
| F               |                 | 5.622027000000 |
| -0.721877000000 | -0.545916000000 |                |
| F               |                 | 3.684599000000 |
| -1.677532000000 | -2.208066000000 |                |
| F               |                 | 1.105445000000 |
| -1.327951000000 | -1.623425000000 |                |

Lutidine. B(C<sub>6</sub>F<sub>5</sub>)<sub>3</sub>:

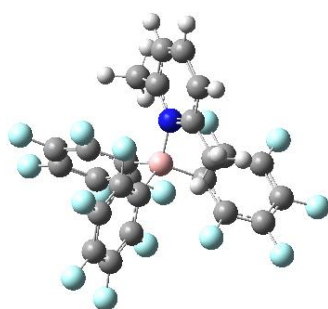

Charge = 0 Multiplicity = 1

C,0,3.6609157244,0.2153832526,-0.5170215461  
 C,0,3.8309540831,-1.1364472541,-0.2788317195  
 C,0,2.7413173827,-1.889234647,0.1315782861  
 C,0,1.5145978375,-1.2690303149,0.2887872337  
 C,0,1.276994976,0.0800470423,0.0353286864  
 C,0,2.4074743471,0.7895511636,-0.347880758  
 C,0,-1.4762752122,-0.0985292392,-0.3028347688  
 C,0,-1.4209085125,-1.1011908605,-1.2637841869  
 C,0,-2.77130282,0.3004627061,0.0109499435  
 C,0,-2.54170003,-1.6637851687,-1.8613407931  
 C,0,-3.9207367124,-0.2251957576,-0.5527884375  
 C,0,-3.8039882623,-1.2255647433,-1.5042884863  
 C,0,-0.1646410765,0.4674881492,2.047528276  
 C,0,-0.9180914885,-0.4398826191,2.7807528825  
 C,0,0.8482169818,1.0883228981,2.7745103636  
 C,0,-0.7197638385,-0.679076359,4.1365456725  
 C,0,1.0763001645,0.8945189948,4.12368989  
 C,0,0.2796663711,-0.0062108943,4.8155075743  
 F,0,5.0272783081,-1.7075478517,-0.436804208  
 F,0,2.3416868987,2.117544071,-0.5959722672  
 F,0,4.7024660021,0.9627094755,-0.9020592526  
 F,0,2.8857964336,-3.1961851742,0.3786092673

F,0,0.499150669,-2.0475691425,0.7221894806  
 F,0,-0.2394382528,-1.5616689953,-1.7280831488  
 F,0,-2.9558730186,1.2595463817,0.9465973591  
 F,0,-5.1289938891,0.2128926528,-0.1821363261  
 F,0,-2.4036503761,-2.6108217382,-2.7967320227  
 F,0,-4.8904158948,-1.7527662391,-2.071738509  
 F,0,1.641901015,1.9918578043,2.1520718161  
 F,0,2.0419864747,1.5648062924,4.7621547994  
 F,0,-1.4826341181,-1.5667640185,4.7842036266  
 F,0,-1.9061864549,-1.1541512191,2.209351424  
 F,0,0.4797205073,-0.2216412084,6.1172182171  
 B,0,-0.2173796533,0.675032726,0.4189191327  
 C,0,-0.7062055264,3.2844349085,0.7762837824  
 C,0,-0.6567042408,4.5978413732,0.3114882459  
 N,0,-0.3813182709,2.2434751856,-0.0537654454  
 C,0,-0.3392942979,4.8828628555,-1.0028359388  
 H,0,-0.8967886583,5.3918279966,1.009563339  
 C,0,-0.1575933653,2.5120638798,-1.3819908857  
 C,0,-0.1235997162,3.8164401541,-1.857731268  
 H,0,0.0768557414,3.9725840426,-2.9111179944  
 C,0,-1.1744243874,3.1529880569,2.2052601985  
 H,0,-1.9002393555,3.9514990139,2.3729662789  
 H,0,-1.6566673857,2.2136211564,2.4404968736  
 C,0,-0.0021022562,1.436794552,-2.4230183662  
 H,0,0.5008079889,0.5331190848,-2.0980500251  
 H,0,-0.9943811041,1.1574388845,-2.7960049042  
 H,0,0.5605920324,1.8507721505,-3.2614191529  
 H,0,-0.2926057617,5.9069533687,-1.3590197502  
 H,0,-0.3488525425,3.3234987908,2.902501282

catBH:

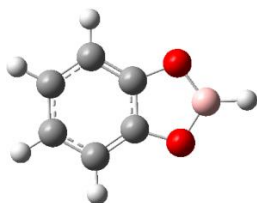

Charge = 0 Multiplicity = 1

C,0,-0.6986832142,0.,2.0849996218  
 C,0,-1.4309124101,0.,0.8927311254  
 C,0,-0.6953692333,0.,-0.275809656  
 C,0,0.6953692333,0.,-0.275809656  
 C,0,1.4309124101,0.,0.8927311254  
 C,0,0.6986832142,0.,2.0849996218  
 H,0,-1.2312211945,0.,3.0304616624

H,0,-2.5155868577,0.,0.8803116673  
H,0,2.5155868577,0.,0.8803116673  
H,0,1.2312211945,0.,3.0304616624  
O,0,-1.1424486603,0.,-1.5789243183  
O,0,1.1424486603,0.,-1.5789243183  
B,0,0.,0.,-2.3585110964  
H,0,0.,0.,-3.5373571991

[LutBCat][HB(C<sub>6</sub>F<sub>5</sub>)<sub>3</sub>]:

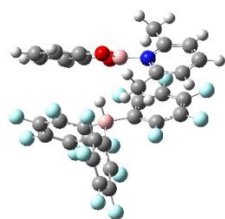

Charge = 0 Multiplicity = 1

C,0,1.4002298563,-1.1081368053,1.1745038  
C,0,0.9069382246,-1.469127356,-1.3916686487  
C,0,-1.094245402,-0.4548648542,0.1972666709  
C,0,2.7249983076,-0.7010814372,1.2811847205  
C,0,0.9702567683,-1.9510495601,2.1900157457  
C,0,1.6278059055,-0.9778133542,-2.4699775921  
C,0,0.5804006165,-2.8160031443,-1.4736113356  
C,0,-1.5903156164,0.0277105664,1.4092251632  
C,0,-2.0692042978,-0.6071485121,-0.7819084266  
C,0,3.5591587296,-1.0495856653,2.3327467301  
C,0,1.7687129574,-2.3353179279,3.2581458499  
C,0,1.9782740084,-1.7493367243,-3.5707300969  
C,0,0.9078481702,-3.6277746719,-2.5466035304  
C,0,-2.9166563278,0.3652242281,1.6299377129  
C,0,-3.409814476,-0.281734491,-0.6085789314  
C,0,3.0741945178,-1.8769381174,3.3321483848  
C,0,1.6163303251,-3.0847432468,-3.6087159513  
C,0,-3.8385682946,0.2203909159,0.6055095755  
F,0,3.262090273,0.0877883379,0.3275824845  
F,0,-0.2964430485,-2.4173351325,2.1982674308  
F,0,2.0189801082,0.3182991942,-2.512647808  
F,0,-0.123403003,-3.3787956032,-0.467190005  
F,0,-0.759172934,0.2290157849,2.4528829718  
F,0,-1.7428978274,-1.0282328977,-2.0270350062  
F,0,4.8187342763,-0.5917213489,2.3948072061  
F,0,1.2904495296,-3.1376031652,4.2209512564  
F,0,2.6581109681,-1.2133121852,-4.5956845787  
F,0,0.5528882607,-4.91989196,-2.5760000754

F,0,-3.3090033194,0.8897844287,2.8018202041  
F,0,-4.2759353196,-0.3829008898,-1.6297800421  
F,0,3.859199138,-2.2322855737,4.3568527812  
F,0,1.9470488047,-3.8453912122,-4.6585346114  
F,0,-5.1082229082,0.6145333339,0.771136226  
C,0,1.3670725871,2.6427497551,1.286865605  
C,0,1.8664346009,3.1101397717,0.0763860202  
C,0,2.1837569118,2.3621195373,2.3639640954  
C,0,3.2100127225,3.3444672434,-0.1302111351  
C,0,3.5512800905,2.5874569274,2.1671445993  
H,0,1.7849728809,1.9767002809,3.2965724656  
C,0,4.0500357622,3.0707886003,0.9539214529  
H,0,3.5856132805,3.7042167161,-1.0818924399  
H,0,4.2412936153,2.3729248061,2.9767169994  
H,0,5.1177140792,3.2284680441,0.8434244757  
C,0,-2.7043577023,3.3587201881,0.0506127723  
C,0,-3.9826405901,3.3563579461,-0.4848056763  
C,0,-4.2042599022,2.8507441075,-1.7607243497  
C,0,-3.1352529835,2.3578886581,-2.498060449  
C,0,-1.8583714493,2.3554067564,-1.9587716589  
N,0,-1.6672350689,2.8493634485,-0.691597262  
H,0,-5.2073766871,2.8339259786,-2.1755301584  
H,0,-4.7962579521,3.7481663365,0.1139924864  
H,0,-3.2772998999,1.9463182347,-3.4903349651  
C,0,-2.44438146,3.9168700028,1.4162547397  
H,0,-1.6556810058,4.6754033416,1.395478168  
H,0,-3.3604787728,4.3775738702,1.7856012847  
C,0,-0.7036060371,1.7945444856,-2.7266847672  
H,0,-0.0983237169,1.1266838133,-2.1113138139  
H,0,-1.0873751171,1.2398568021,-3.5832478027  
H,0,-0.053003301,2.5951881894,-3.090696309  
B,0,0.5146480699,-0.5756403555,-0.0863362624  
B,0,-0.2824895811,2.8540629543,-0.1094919091  
O,0,-0.0049484412,2.5064031492,1.1800346624  
O,0,0.8154379969,3.2655732829,-0.8115373332  
H,0,-2.1408971633,3.1332142648,2.1148847525  
H,0,0.8778952629,0.5579969089,-0.3098025621

[LutBcat]<sup>+</sup>:

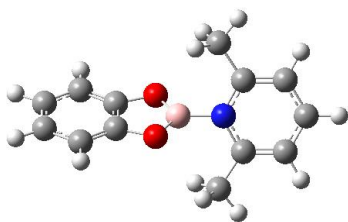

Charge = 1 Multiplicity = 1

C,0,2.3954914849,2.6777195681,0.3427490476  
C,0,2.330304772,3.5765188696,-0.716126942  
C,0,3.5899209973,2.3010063325,0.9209824508  
C,0,3.4552976562,4.15696697,-1.2642105828  
C,0,4.7401607648,2.8808695853,0.3759208538  
H,0,3.6279744528,1.5964252934,1.7443499632  
C,0,4.6745536337,3.785239376,-0.688349411  
H,0,3.3911849183,4.8592645016,-2.087912337  
H,0,5.7073733616,2.6206704118,0.7926860632  
H,0,5.5920278074,4.2109912432,-1.0806159696  
C,0,-1.8868183916,3.284558829,0.8366401274  
C,0,-3.2663663597,3.167688838,0.8222099591  
C,0,-3.897810891,2.5770413196,-0.2677849436  
C,0,-3.1452544111,2.1080759587,-1.3398894272  
C,0,-1.7665659135,2.2336914962,-1.3186462368  
N,0,-1.1763624418,2.8162817748,-0.2325942867  
H,0,-4.979059604,2.4819811893,-0.2817654617  
H,0,-3.831721559,3.5423815094,1.6672577914  
H,0,-3.6147003802,1.6424268385,-2.1983284092  
C,0,-1.1374487104,3.900880167,1.9760490407  
H,0,-0.4359854828,4.6683319208,1.62920144  
H,0,-1.8443348139,4.3695804308,2.6607269344  
C,0,-0.8921369163,1.7601656483,-2.4370362326  
H,0,-0.0768255208,1.125877161,-2.0705673034  
H,0,-1.4886163446,1.177093302,-3.1387416389  
H,0,-0.4570417691,2.6094454644,-2.9726497601  
B,0,0.3150854086,2.9472650277,-0.2132838036  
O,0,1.109086372,2.2703501354,0.6656382888  
O,0,1.0013480191,3.7541775135,-1.0729945316  
H,0,-0.5749561389,3.139309324,2.5247563176

TS1:

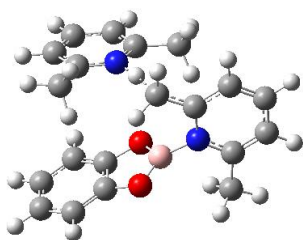

Charge = 0 Multiplicity = 1

C,0,-2.7572184194,-0.7400424489,0.7711285815  
C,0,-2.5683661397,-0.4504746249,2.1194283827  
C,0,-3.0350034111,-2.015718868,0.323206106  
C,0,-2.6477328997,-1.4159191405,3.1026359991  
C,0,-3.1119050917,-3.0079403966,1.307998051  
H,0,-3.1777571623,-2.2314277495,-0.7299136251  
C,0,-2.9237324323,-2.716216431,2.662665156  
H,0,-2.4973515273,-1.1749665945,4.1499898691  
H,0,-3.3249960551,-4.0287918473,1.00941086  
H,0,-2.9961333197,-3.515177501,3.3929617701  
C,0,-0.4750843631,2.9375701922,0.5109568609  
C,0,-0.0185108514,4.2798833425,0.4350877329  
C,0,-0.9093277224,5.3202611453,0.476661406  
C,0,-2.2989373836,5.0812564409,0.5991708421  
C,0,-2.7470240918,3.7925010914,0.6969767891  
N,0,-1.8367124928,2.7576967638,0.6626412725  
H,0,-0.5490526484,6.3420570484,0.4049338681  
H,0,1.0473186042,4.4477633658,0.3273363602  
H,0,-3.0113884814,5.8965814746,0.6190289225  
C,0,0.3810840883,1.8053239093,0.5449755203  
H,0,1.4061488533,2.0169897888,0.2454290409  
H,0,-0.0096094004,0.8939013425,0.0866465553  
C,0,-4.1885053121,3.4129230007,0.8361546686  
H,0,-4.3564111456,2.8179636926,1.7413206857  
H,0,-4.8046007821,4.3102859237,0.9002044928  
H,0,-4.5193031228,2.8263554291,-0.0277872008  
B,0,-2.2623291323,1.3712221313,0.9653130324  
O,0,-2.5862402347,0.4195512855,0.0346824952  
O,0,-2.2711281555,0.8925622848,2.2510446104  
C,0,0.336228868,1.6401281319,4.14724264  
C,0,0.3391539061,1.1016519234,5.4304410607  
C,0,0.5670250771,-0.2630794063,5.590127075  
C,0,0.7836389228,-1.0658897643,4.473908044  
C,0,0.7696589542,-0.4843293231,3.2085585621  
N,0,0.553966754,0.8372055645,3.0919195471  
H,0,0.5751556518,-0.700124987,6.583907968  
H,0,0.1666247054,1.7491778096,6.2829860763

H,0,0.9593824374,-2.1316024436,4.57009546  
C,0,0.0821376135,3.0909638208,3.8641590176  
H,0,0.067405542,3.6612766307,4.7938667425  
H,0,0.8551897082,3.4992812585,3.2065163814  
H,0,-0.8872533587,3.2163884947,3.3667578003  
C,0,0.968606944,-1.2680863719,1.945532181  
H,0,1.2353514434,-2.2994327594,2.1800285304  
H,0,0.0473894377,-1.2762936709,1.3515989749  
H,0,1.7597857924,-0.8248648716,1.3336699872  
H,0,0.4929838335,1.3365889129,1.9455818456

2:

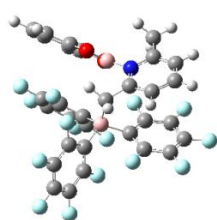

Charge = 0 Multiplicity = 1

C,0,-1.2603744373,-1.155755068,-0.4131148268  
C,0,-0.6535813441,1.3251767495,-0.1530506679  
C,0,1.2617682189,-0.5079720026,0.5551588221  
C,0,-2.2371463713,-1.1199005362,-1.4074919137  
C,0,-1.6024838412,-1.961451362,0.6719971521  
C,0,-0.9993870386,2.2999046849,-1.0802003001  
C,0,-1.0486451531,1.6178759621,1.1494706717  
C,0,1.7194028929,-1.8091873215,0.7518999558  
C,0,2.1443929185,0.4614075871,1.0176360826  
C,0,-3.4184706571,-1.8469656642,-1.3800364796  
C,0,-2.7524018518,-2.7378332235,0.7265833029  
C,0,-1.6581831256,3.4795230477,-0.7525525287  
C,0,-1.702011482,2.7783365063,1.5267825087  
C,0,2.9384466398,-2.1370406199,1.3221674885  
C,0,3.3747176164,0.1860597938,1.6008089373  
C,0,-3.6684255192,-2.6871978208,-0.3105091971  
C,0,-2.0113854373,3.7238828436,0.5613085065  
C,0,3.7838433319,-1.1273478761,1.7482822356  
F,0,-2.08126244,-0.310755702,-2.4821966709  
F,0,-0.824772878,-2.0166125686,1.7713027853  
F,0,-0.7129100262,2.1534551561,-2.3948297087  
F,0,-0.7897269456,0.7299097517,2.1346828405  
F,0,1.0136289599,-2.864825368,0.2774308977  
F,0,1.8775955073,1.7742606158,0.8300241519  
F,0,-4.3042440445,-1.7531247031,-2.3791623316



F,0,-2.9913460739,-3.5231062392,1.785361643  
F,0,-1.9578111598,4.376849185,-1.701704044  
F,0,-2.0427501428,2.994102989,2.8043331809  
F,0,3.3335229595,-3.4172941205,1.3952720017  
F,0,4.1926528913,1.1816044778,1.9663693236  
F,0,-4.7750090886,-3.4350531086,-0.2802159831  
F,0,-2.6492565847,4.8502064233,0.8957559428  
F,0,4.9907573361,-1.4148697204,2.2469448471  
C,0,-1.3824928865,-4.1237985185,-2.5969951319  
C,0,-1.4568833808,-3.2377939896,-3.6669491611  
C,0,-2.3837928573,-5.0320118492,-2.3195472923  
C,0,-2.5314190102,-3.2088971475,-4.5315947151  
C,0,-3.4825995434,-5.0131510185,-3.1864125441  
H,0,-2.3229351702,-5.7068817364,-1.4722430646  
C,0,-3.5522199218,-4.1278597493,-4.2663986075  
H,0,-2.5810545115,-2.5041133208,-5.3544096449  
H,0,-4.3011041728,-5.7038701536,-3.012983155  
H,0,-4.424454172,-4.1437566276,-4.9113604326  
C,0,1.9576025902,-1.0156243648,-2.091885321  
C,0,3.2589322737,-0.5582163723,-1.8711490818  
C,0,4.3082138647,-1.4527423323,-1.7702088071  
C,0,4.0711328591,-2.8196294566,-1.932610351  
C,0,2.7963248967,-3.2676305515,-2.2130068474  
N,0,1.7673421429,-2.3577470586,-2.2829221539  
H,0,5.3126584629,-1.0949835404,-1.5637174349  
H,0,3.4137227004,0.5072825277,-1.7433599258  
H,0,4.8737413146,-3.5440711008,-1.8594589752  
C,0,0.8002845211,-0.0916720904,-1.996577896  
H,0,1.2120220694,0.9125293727,-2.1127309256  
H,0,0.0947093137,-0.2462634776,-2.81229307  
C,0,2.5059826863,-4.7199998146,-2.4363471383  
H,0,1.8963621485,-4.8810340594,-3.3310388336  
H,0,3.4489497212,-5.2521218001,-2.5627486078  
H,0,1.9744866192,-5.1424917817,-1.5786424454  
B,0,0.0350920032,-0.133123776,-0.483373398  
B,0,0.3948647505,-2.87264438,-2.5852648107  
O,0,-0.2104126374,-3.8896602747,-1.9027743243  
O,0,-0.3253249741,-2.4409917761,-3.6668664294

TS2:

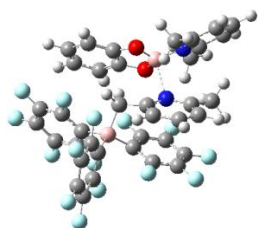

Charge = 0 Multiplicity = 1

C,0,2.0725601719,-1.1943523841,-0.3567836115  
C,0,2.6165634405,1.1958069247,0.5302373297  
C,0,0.5635404248,0.9190628094,-1.2833807811  
C,0,2.4142829848,-2.0737503948,0.665147802  
C,0,2.3914909503,-1.6596847018,-1.6283572301  
C,0,2.9183160047,1.506978625,1.8488990914  
C,0,3.5538204699,1.6680885091,-0.3848611181  
C,0,-0.3459258377,0.1426992733,-1.9945898442  
C,0,0.3956570766,2.2855381729,-1.4701578915  
C,0,2.9654768613,-3.3306785689,0.4667908088  
C,0,2.9444387417,-2.9082901198,-1.8789177318  
C,0,4.024313319,2.255517876,2.2377315402  
C,0,4.6715890509,2.4130610411,-0.0517956012  
C,0,-1.3597900842,0.651944935,-2.7872594316  
C,0,-0.6082267988,2.8470307978,-2.2502551782  
C,0,3.2277174862,-3.7570739729,-0.8227234521  
C,0,4.9097959957,2.7142420087,1.2807391819  
C,0,-1.4989608799,2.0229156447,-2.9135475922  
F,0,2.2141889905,-1.7231489113,1.9579199191  
F,0,2.1499476414,-0.907942272,-2.7225551242  
F,0,2.1247670067,1.0982010055,2.8701795414  
F,0,3.3760429995,1.4116765154,-1.6994456168  
F,0,-0.3286448262,-1.2030931391,-1.8654365852  
F,0,1.1831018192,3.1766289344,-0.8207463875  
F,0,3.2202063474,-4.1420170403,1.5044394293  
F,0,3.1986958903,-3.3036824006,-3.1349855168  
F,0,4.2313271409,2.5369370912,3.5327559411  
F,0,5.5206107082,2.8457777754,-0.9942152323  
F,0,-2.2555830709,-0.1642314774,-3.3701335661  
F,0,-0.7630062797,4.1791616246,-2.3151192089  
F,0,3.7385864436,-4.974099457,-1.0457370787  
F,0,5.9813271854,3.4338208442,1.6319985511  
F,0,-2.5126234954,2.5409510043,-3.6222180694  
C,0,-1.7365847534,-2.7755590334,0.1949045302  
C,0,-1.6319372106,-2.610714692,1.5709960578  
C,0,-1.0051430975,-3.7248488032,-0.4909774287  
C,0,-0.7790976596,-3.3738660429,2.3433729041

C,0,-0.1470215611,-4.5184315821,0.2808734964  
H,0,-1.0834685034,-3.8332862194,-1.5672765497  
C,0,-0.0334430224,-4.3451189154,1.6636364004  
H,0,-0.6835859244,-3.2129675366,3.4121557197  
H,0,0.4519080344,-5.2791161037,-0.2108288043  
H,0,0.6580889367,-4.9663094545,2.2234239183  
C,0,-0.8290509992,1.1542480399,1.1135206609  
C,0,-0.4734776907,2.3658965291,1.7193715165  
C,0,-1.2903258311,3.4759453305,1.5611653407  
C,0,-2.4209993032,3.3689650002,0.7583524458  
C,0,-2.7410224666,2.1282271515,0.2058434601  
N,0,-1.9994234752,1.0273888497,0.4418077968  
H,0,-1.0258648317,4.4248748396,2.0193832178  
H,0,0.4514442313,2.4303787134,2.2790396978  
H,0,-3.0419698263,4.2313466095,0.5357804391  
C,0,0.1271135384,0.0085259175,1.0774833804  
H,0,0.4883487974,-0.2369409045,2.0757671966  
H,0,-0.3929416695,-0.8572253696,0.6751053589  
C,0,-3.9185734897,2.0288520824,-0.7278258792  
H,0,-4.870302602,2.0330029211,-0.1841974878  
H,0,-3.9287514587,2.901575555,-1.3874303852  
H,0,-3.8608533446,1.1316613058,-1.3479431337  
B,0,1.3759410775,0.2594421805,-0.0081583742  
B,0,-3.0431363608,-1.1151892111,0.7919882537  
O,0,-2.6236048685,-1.8451053931,-0.3025268221  
O,0,-2.4493313367,-1.5720565984,1.9612242311  
C,0,-5.3789058756,-0.7396375595,-0.071119097  
C,0,-6.6745574934,-0.2727329681,0.1024188703  
C,0,-7.0197787775,0.4512496501,1.2339388129  
C,0,-6.0466878627,0.7064080824,2.1880756076  
C,0,-4.7547018501,0.2249028188,2.0263092158  
N,0,-4.4336456429,-0.4942662175,0.8982297135  
H,0,-8.0321424408,0.8196017378,1.3657228886  
H,0,-7.4027579735,-0.4778402937,-0.6728804963  
H,0,-6.2747148767,1.2767256592,3.0807709793  
C,0,-5.0557538698,-1.4932961163,-1.3265994152  
H,0,-4.8158042052,-2.5375468012,-1.1127443853  
H,0,-5.931808343,-1.461969987,-1.9742845297  
H,0,-4.2057249615,-1.0616660258,-1.8573294114  
C,0,-3.7569929116,0.4938225196,3.1141638983  
H,0,-3.6803485036,-0.3760212126,3.7732315733  
H,0,-2.7584842007,0.7151202623,2.7418856537  
H,0,-4.1136410945,1.3419212564,3.6999176464

3:

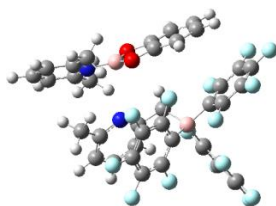

Charge = 0 Multiplicity = 1

C,0,1.8886017074,1.2655754746,0.3586617907  
C,0,2.6098734033,-1.0156208335,-0.6210646112  
C,0,0.5765762623,-1.0025011948,1.2267782696  
C,0,2.2266584434,2.164129891,-0.6477112033  
C,0,2.1794452258,1.7205697683,1.6405179399  
C,0,2.9192109731,-1.2784842997,-1.948303638  
C,0,3.6112621997,-1.3914934615,0.2709476592  
C,0,-0.3932804148,-0.3528532069,1.9819999343  
C,0,0.5583798455,-2.3844254305,1.368050531  
C,0,2.7680552261,3.4208454056,-0.4272255744  
C,0,2.7110790535,2.9739424817,1.9135217348  
C,0,4.0933454273,-1.897866611,-2.3644407865  
C,0,4.7959485029,-2.0087585252,-0.0890900043  
C,0,-1.3240623909,-0.992823677,2.7813884574  
C,0,-0.3629043366,-3.0761793153,2.1448019814  
C,0,3.0042893526,3.835645891,0.8711000601  
C,0,5.0406806166,-2.2685108091,-1.4292674668  
C,0,-1.3188485645,-2.3745796058,2.8563627029  
F,0,2.0353933907,1.8268181571,-1.9456521379  
F,0,1.950662216,0.9473918503,2.7225008631  
F,0,2.0713415057,-0.9457527441,-2.953339292  
F,0,3.4342877292,-1.1631213487,1.5915307546  
F,0,-0.5352694593,0.9889992284,1.8843022777  
F,0,1.4201214036,-3.1651991182,0.672079433  
F,0,3.0222031898,4.251668082,-1.4499017985  
F,0,2.9383077014,3.3597982237,3.1777057523  
F,0,4.3086284164,-2.1367929591,-3.6668617147  
F,0,5.7049933419,-2.3540578567,0.8332151885  
F,0,-2.2861143493,-0.2954226336,3.4120766378  
F,0,-0.3724617305,-4.4190598528,2.1639589495  
F,0,3.4840816918,5.0613318184,1.1160075332  
F,0,6.1780641722,-2.8622366754,-1.8080894946  
F,0,-2.2557650307,-3.0214848847,3.565116495  
C,0,-1.8398640407,2.8366156223,-0.043927343  
C,0,-1.7882642158,2.8397090519,-1.4318427515  
C,0,-1.0595752246,3.6784352732,0.7257341661  
C,0,-0.9440737511,3.6700352956,-2.1420248177

C,0,-0.2170018472,4.543675274,0.0205605462  
H,0,-1.1007074643,3.6612000378,1.8091490745  
C,0,-0.1559499125,4.5372620165,-1.3778383594  
H,0,-0.8988819899,3.6459284204,-3.2254979909  
H,0,0.4138140043,5.2318337745,0.5753841051  
H,0,0.5288117177,5.2107099152,-1.882617571  
C,0,-0.8217525872,-1.2955190408,-1.1498602496  
C,0,-0.4001105933,-2.4513600091,-1.8197670004  
C,0,-1.1387191085,-3.620525146,-1.6848282935  
C,0,-2.2675529389,-3.6207955157,-0.8709068729  
C,0,-2.6443431605,-2.424744665,-0.2530944153  
N,0,-1.9578285074,-1.2855912314,-0.4216156526  
H,0,-0.8215170981,-4.5307900476,-2.1864703636  
H,0,0.5065174705,-2.430625466,-2.4122227457  
H,0,-2.8400251267,-4.5270525348,-0.6961411489  
C,0,0.0194237902,-0.0580571814,-1.1097308904  
H,0,0.3594590841,0.2240253295,-2.1063249622  
H,0,-0.5998534513,0.751317711,-0.7163818824  
C,0,-3.842763857,-2.3859071209,0.6582082677  
H,0,-4.7764151528,-2.384037517,0.0839311935  
H,0,-3.8645953719,-3.2741244817,1.2970803616  
H,0,-3.8179861988,-1.4948837238,1.2918744803  
B,0,1.2909640451,-0.2177879647,-0.0355786314  
B,0,-3.2590793814,1.3571762713,-0.7917201536  
O,0,-2.7650030417,1.8949208407,0.3643501169  
O,0,-2.6819346349,1.9023489626,-1.9129354197  
C,0,-5.4374412365,0.5463550039,0.1027706528  
C,0,-6.6343524479,-0.133270316,-0.0656124158  
C,0,-6.8635327769,-0.8854558734,-1.2090536488  
C,0,-5.8710198346,-0.9649818484,-2.1755328751  
C,0,-4.6811200593,-0.2687299322,-2.0215795288  
N,0,-4.4834491198,0.4872165483,-0.8888067703  
H,0,-7.8016881415,-1.4157127268,-1.3388937743  
H,0,-7.3790903634,-0.0670290217,0.7182962027  
H,0,-6.0048937806,-1.560801829,-3.0708375708  
C,0,-5.2060237566,1.3235260881,1.3620779202  
H,0,-5.0400847316,2.384265678,1.1590774305  
H,0,-6.0879452578,1.2228678625,1.9940602711  
H,0,-4.3360344314,0.9461817346,1.9043415508  
C,0,-3.6490059312,-0.3507320662,-3.104905392  
H,0,-3.7081510276,0.5274034998,-3.7546515275  
H,0,-2.6332602569,-0.415648,-2.7165702284  
H,0,-3.8580473617,-1.2379317247,-3.7038032559

IM4:

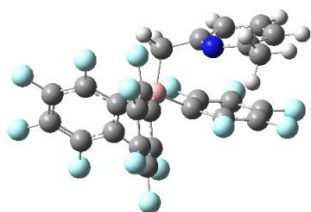

Charge = -1 Multiplicity = 1

C,0,-1.7839859637,-0.9190155381,-0.4171427901  
C,0,-0.557069271,1.3397701359,-0.0255103729  
C,0,0.8412174204,-0.9776327827,0.4250438061  
C,0,-2.7571460768,-0.5763512087,-1.3501361667  
C,0,-2.2218575764,-1.8067933247,0.5594469164  
C,0,-0.5778650567,2.473181498,-0.8308489062  
C,0,-0.8510544194,1.5882836837,1.3118605892  
C,0,1.0485897875,-2.3433684557,0.2587521464  
C,0,1.8850445406,-0.3328104823,1.0791019939  
C,0,-4.045967782,-1.0889024479,-1.3614158895  
C,0,-3.5024627841,-2.3447026873,0.593343284  
C,0,-0.8004763236,3.7554828332,-0.3384919073  
C,0,-1.0856460781,2.8433114248,1.8473325153  
C,0,2.1879935323,-3.0203855474,0.6612207594  
C,0,3.0565022851,-0.9616975896,1.4827107674  
C,0,-4.4226992402,-1.9866154581,-0.3766951335  
C,0,-1.0554341779,3.9449217872,1.0072734372  
C,0,3.2154408155,-2.3175735961,1.2679833588  
F,0,-2.4733566921,0.3230625163,-2.3195788407  
F,0,-1.4030520261,-2.2076981075,1.5516976548  
F,0,-0.3951940577,2.4108669181,-2.1635074754  
F,0,-0.8820207046,0.5526588905,2.1812276395  
F,0,0.1440018308,-3.0822728516,-0.4278261057  
F,0,1.8563703891,0.9998059693,1.3062158311  
F,0,-4.9282595945,-0.7213560689,-2.3029328548  
F,0,-3.8593751956,-3.2047709329,1.559008979  
F,0,-0.7842019839,4.8149345722,-1.1637887092  
F,0,-1.3409957982,3.0062620198,3.1552322833  
F,0,2.3431200532,-4.3283999445,0.398224737  
F,0,4.05959428,-0.2533055498,2.0273414334  
F,0,-5.6614672761,-2.4971774257,-0.359823474  
F,0,-1.2827068096,5.1747720089,1.4902621824  
F,0,4.3613575865,-2.9319105199,1.5978636962  
C,0,1.8130409385,-0.0695923364,-1.9933262512  
C,0,2.7620907416,-1.0953059805,-2.1486332967  
C,0,4.0942434766,-0.8344522415,-1.8596727907

C,0,4.4613139549,0.4469750597,-1.4500217217  
 C,0,3.470519662,1.4283345229,-1.3774692799  
 N,0,2.184673589,1.1698296289,-1.6436388849  
 H,0,4.8395269049,-1.6226726628,-1.9332548848  
 H,0,2.4387039956,-2.0878713514,-2.4492204375  
 H,0,5.4878715293,0.6830878059,-1.1876250914  
 C,0,0.3410888155,-0.3568946867,-2.0343782546  
 H,0,-0.1621902277,0.314076236,-2.729525993  
 H,0,0.1862088684,-1.3838959759,-2.3870733302  
 C,0,3.7760989005,2.8392030448,-0.9540822308  
 H,0,3.2887316309,3.0454191083,0.0047103035  
 H,0,4.8504928101,3.0079991087,-0.8447041226  
 H,0,3.3740620519,3.5464988725,-1.6852538529  
 B,0,-0.2981012743,-0.2151548909,-0.5003232652

HLutidine+

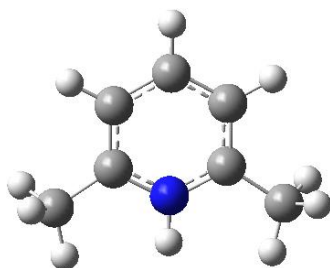

Charge = 1 Multiplicity = 1

C,0,1.2012667606,0.2620085635,0.  
 C,0,1.2086693225,-1.1247521552,0.  
 C,0,0.,-1.8159317823,0.  
 C,0,-1.2086693225,-1.1247521552,0.  
 C,0,-1.2012667606,0.2620085635,0.  
 N,0,0.,0.8819413095,0.  
 H,0,0.,-2.9014568778,0.  
 H,0,2.1590350028,-1.6460934899,0.  
 H,0,-2.1590350028,-1.6460934899,0.  
 C,0,2.4373575893,1.1010450984,0.  
 H,0,3.0383058982,0.8703442968,0.883679323  
 H,0,3.0383058982,0.8703442968,-0.883679323  
 H,0,2.2058834922,2.1678929889,0.  
 C,0,-2.4373575893,1.1010450984,0.  
 H,0,-3.0383058982,0.8703442968,-0.883679323  
 H,0,-3.0383058982,0.8703442968,0.883679323  
 H,0,-2.2058834922,2.1678929889,0.  
 H,0,0.,1.9023601519,0.

TS3

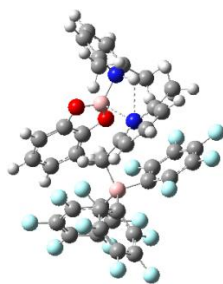

Charge = 0 Multiplicity = 1

C,0,-1.7970916739,-1.3781540107,0.4653811612  
C,0,-2.7498717628,0.7864557642,-0.6069415236  
C,0,-0.7019578253,1.0402711865,1.2148347899  
C,0,-1.9924062511,-2.3749969121,-0.4848192384  
C,0,-2.0460658292,-1.7876485812,1.7713536941  
C,0,-3.0975917434,0.9119164099,-1.9444657701  
C,0,-3.7629135999,1.1586706084,0.2732568377  
C,0,0.3207545162,0.5063932217,1.9920409284  
C,0,-0.7917328317,2.4251587236,1.2853572065  
C,0,-2.3514340174,-3.6805222583,-0.1882428626  
C,0,-2.3986338841,-3.0845485272,2.1200335008  
C,0,-4.3190607369,1.4088293988,-2.3862431864  
C,0,-4.9957189986,1.6540874884,-0.1126442312  
C,0,1.2066208422,1.2600554812,2.7427781857  
C,0,0.0779579109,3.2270808359,2.0153642736  
C,0,-2.546099066,-4.043622787,1.132415162  
C,0,-5.2774287011,1.7849772437,-1.4642822551  
C,0,1.0938914994,2.6399280269,2.7470554488  
F,0,-1.8329642598,-2.0977396356,-1.8006700735  
F,0,-1.9385407258,-0.9218166357,2.8006125718  
F,0,-2.2383449195,0.5572042228,-2.9329846923  
F,0,-3.5491080395,1.0525244912,1.6028006052  
F,0,0.5577797486,-0.8261303126,1.9745938679  
F,0,-1.7165531575,3.0972771078,0.56084677  
F,0,-2.4750141403,-4.5968582272,-1.1596060669  
F,0,-2.590270155,-3.4196683349,3.4036577449  
F,0,-4.5686412968,1.5291002079,-3.6982470169  
F,0,-5.9146489793,2.0060271872,0.796039248  
F,0,2.2284096351,0.6745783953,3.397420397  
F,0,-0.0141536586,4.5643361231,1.9613615908  
F,0,-2.8584295466,-5.304920462,1.4511908114  
F,0,-6.4589930169,2.2634473377,-1.8669021596  
F,0,1.9924759315,3.3924148346,3.3978561811  
C,0,2.0545198698,-2.4595962523,-0.0144068366  
C,0,2.0097412197,-2.3827220662,-1.4013856078  
C,0,1.4286646843,-3.4655164072,0.6926394944



C,0,1.3390608947,-3.3049199608,-2.1760785142  
C,0,0.760266341,-4.4219889628,-0.0802196415  
H,0,1.4497684684,-3.5015442127,1.7762043053  
C,0,0.7154725844,-4.3443860923,-1.4766853214  
H,0,1.2919809142,-3.218312596,-3.2561312683  
H,0,0.2513914657,-5.2400590051,0.4198925525  
H,0,0.1728680619,-5.1010792174,-2.0329149033  
C,0,0.6312863716,1.3451838401,-1.2222922337  
C,0,0.0340071291,2.3947052833,-1.9348919917  
C,0,0.5747440664,3.66879977,-1.8687824999  
C,0,1.6872501955,3.8834688891,-1.0617278028  
C,0,2.2715751675,2.7933880513,-0.4216846659  
N,0,1.7946445383,1.5342632713,-0.5507129085  
H,0,0.1091904223,4.4935790751,-2.4002015  
H,0,-0.8688410934,2.20596558,-2.5013809768  
H,0,2.0975697495,4.8771257985,-0.9129198361  
C,0,-0.0751024502,0.0391316124,-1.0653840352  
H,0,-0.3685391088,-0.376573122,-2.0296062712  
H,0,0.5975878499,-0.6599113379,-0.574570121  
C,0,3.4681950187,3.0377627553,0.4659163679  
H,0,4.4175104937,3.0365506178,-0.091786816  
H,0,3.3949915358,4.0318227088,0.9140971733  
H,0,3.5217034193,2.3148047697,1.2869860134  
B,0,-1.3651415037,0.1418327154,0.0006080236  
B,0,3.1015003682,-0.6746281069,-0.6436082083  
O,0,2.7794184479,-1.3749261439,0.4739857584  
O,0,2.6964998656,-1.2423466088,-1.8129789015  
C,0,5.3217032648,-0.3222953781,0.3221285126  
C,0,6.3842325712,-1.0533779354,-0.1226701718  
C,0,6.6756910586,-1.1042719976,-1.494395579  
C,0,5.9376280874,-0.3793720821,-2.4466696915  
C,0,4.8487199234,0.3442372571,-2.0644469412  
N,0,4.4263738009,0.243015889,-0.6749796191  
H,0,7.5336686137,-1.6827444854,-1.825964612  
H,0,7.0250036697,-1.5420966529,0.6023734109  
H,0,6.2405662987,-0.3618073461,-3.4868766768  
C,0,4.991882983,-0.0385482488,1.7343531585  
H,0,3.9287646819,0.1490175218,1.88838972  
H,0,5.3232866073,-0.8657757983,2.3644733078  
H,0,5.5483176186,0.8634466191,2.0291691898  
C,0,4.0331330048,1.2170198887,-2.9348716063  
H,0,2.976600075,0.9284140591,-2.9281899853  
H,0,4.0948149781,2.2524240348,-2.5731986794  
H,0,4.4178092576,1.1652144577,-3.9533553659

H,0,4.1036526378,1.1740424888,-0.3487652707
